# Supplementary material for: Cohort study investigating gout flares and management in UK general practice
Source: Springer Nature journal article supplement (doi:10.1186/s12875-023-02201-7), 2023-11-22
Supplement: MOESM1 [file 26344592]

**Cohort study investigating gout flares and management in UK general practice: Additional File A1**

**Univariate analysis:** Association between variables and flares (Cox proportional-hazards model Anderson-Gill method) and ULT initiation (logistic regression)

|                                       |             | Hazard ratio for flares<br>(95%CI) | P      | Odds Ratio for ULT<br>(95%CI) | P      |
|---------------------------------------|-------------|------------------------------------|--------|-------------------------------|--------|
|                                       | 50-59       | 1.00 (0.94-1.07)                   | 0.926  | 0.96 (0.91-1.02)              | 0.181  |
| Age (25-49 reference)                 | 60-69       | <b>1.18 (1.11-1.25)</b>            | <0.001 | 0.97 (0.93-1.04)              | 0.644  |
|                                       | 70-79       | <b>1.37 (1.30-1.46)</b>            | <0.001 | 1.03 (0.97-1.09)              | 0.408  |
|                                       | 80+         | <b>1.38 (1.29-1.48)</b>            | <0.001 | <b>0.82 (0.77-0.88)</b>       | <0.001 |
|                                       | Female      | <b>0.78 (0.74-0.81)</b>            | <0.001 | <b>0.77 (0.74-0.81)</b>       | <0.001 |
| Sex (ref male)                        | Black       | <b>1.18 (1.10-1.27)</b>            | <0.001 | 1.12 (1.03-1.21)              | 0.004  |
|                                       | South Asian | 0.92 (0.78-1.09)                   | 0.337  | <b>0.78 (0.67-0.95)</b>       | 0.011  |
|                                       | Mixed Race  | 0.76 (0.51-1.13)                   | 0.178  | 0.83 (0.54-1.27)              | 0.389  |
|                                       | Other       | 1.03 (0.90-1.19)                   | 0.639  | 0.94 (0.81-1.08)              | 0.391  |
|                                       | Missing     | 1.03 (1.00-1.07)                   | 0.153  | <b>1.00 (0.95-1.06)</b>       | 0.960  |
| IMD (ref 1st (least deprived) decile) | 2           | 1.11 (1.01-1.22)                   | 0.031  | 1.04 (0.94-1.16)              | 0.429  |
|                                       | 3           | 1.02 (1.01-1.24)                   | 0.644  | 1.09 (1.05-1.31)              | 0.145  |
|                                       | 4           | 1.12 (1.01-1.24)                   | 0.026  | 1.17 (1.05-1.31)              | 0.006  |
|                                       | 5           | <b>1.24 (1.10-1.39)</b>            | <0.001 | <b>1.29 (1.13-1.48)</b>       | <0.001 |
|                                       | Missing     | <b>1.19 (1.11-1.28)</b>            | <0.001 | <b>1.49 (1.36-1.65)</b>       | <0.001 |
|                                       | <20         | 0.90 (0.73-1.11)                   | 0.309  | 0.78 (0.64-0.95)              | 0.014  |
| BMI kg/m <sup>2</sup> (ref 20-24.9)   | 25-29.9     | <b>1.19 (1.12-1.27)</b>            | <0.001 | <b>1.38 (1.29-1.47)</b>       | <0.001 |
|                                       | 30-34.9     | <b>1.32 (1.24-1.41)</b>            | <0.001 | <b>1.58 (1.48-1.69)</b>       | <0.001 |
|                                       | 35+         | <b>1.53 (1.42-1.64)</b>            | <0.001 | <b>1.83 (1.70-1.97)</b>       | <0.001 |
|                                       | Missing     | 1.09 (1.00-1.20)                   | 0.061  | <b>1.30 (1.19-1.43)</b>       | <0.001 |
|                                       | 1-9         | 0.98 (0.91-1.06)                   | 0.673  | <b>0.72 (0.66-0.80)</b>       | <0.001 |
| Alcohol units per week (ref 0)        | 10-24       | 0.97 (0.90-1.04)                   | 0.393  | <b>0.79 (0.72-0.87)</b>       | <0.001 |
|                                       | 25-42       | 1.06 (0.97-1.17)                   | 0.203  | 0.86 (0.77-0.96)              | 0.007  |
|                                       | >42         | 1.07 (0.94-1.22)                   | 0.292  | <b>0.81 (0.74-0.92)</b>       | 0.002  |
|                                       | Missing     | 1.02 (0.95-1.10)                   | 0.512  | <b>0.81 (0.74-0.87)</b>       | <0.001 |
| Hypertension                          |             | <b>1.37 (0.32-1.43)</b>            | <0.001 | <b>1.26 (1.21 (1.31))</b>     | <0.001 |
| Type 1 diabetes                       |             | 1.23 (0.94-1.62)                   | 0.136  | 1.12 (0.86-1.46)              | 0.407  |
| Type 2 diabetes                       |             | <b>1.31 (1.24-1.39)</b>            | <0.001 | 1.09 (1.02-1.15)              | 0.005  |
| Heart Failure                         |             | <b>2.25 (2.11-2.40)</b>            | <0.001 | <b>2.08 (1.93-2.24)</b>       | <0.001 |
| CVD                                   |             | <b>1.62 (1.55-1.70)</b>            | <0.001 | <b>1.30 (1.24-1.36)</b>       | <0.001 |
| Diuretics                             |             | <b>1.60 (1.54-1.67)</b>            | <0.001 | <b>1.59 (1.53-1.66)</b>       | <0.001 |
| Aspirin                               |             | <b>1.33 (1.27-1.40)</b>            | <0.001 | <b>1.24 (1.17-1.30)</b>       | <0.001 |
| CKD (ref none)                        | CKD Stage 3 | <b>1.69 (1.62-1.77)</b>            | <0.001 | <b>1.71 (1.63-1.79)</b>       | <0.001 |
|                                       | CKD stage 4 | <b>2.08 (1.83-2.35)</b>            | <0.001 | <b>2.52 (2.20-2.90)</b>       | <0.001 |
|                                       | CKD stage 5 | 1.16 (0.93-1.46)                   | 0.173  | <b>1.80 (1.44-2.25)</b>       | <0.001 |
|                                       | 360-419     | <b>2.17 (1.89-2.53)</b>            | <0.001 | <b>3.23 (2.82-3.82)</b>       | <0.001 |
|                                       | 420-479     | <b>3.16 (2.77-3.61)</b>            | <0.001 | <b>5.97 (5.15-6.93)</b>       | <0.001 |
| Serum urate μmol/L (ref <360)         | 480-539     | <b>4.34 (3.79-4.95)</b>            | <0.001 | <b>9.99 (8.61-11.6)</b>       | <0.001 |
|                                       | >=540       | <b>6.70 (5.86-7.67)</b>            | <0.001 | <b>19.0 (16.4-22.0)</b>       | <0.001 |
|                                       | Missing     | <b>3.15 (2.77-3.59)</b>            | <0.001 | <b>5.62 (4.84-6.53)</b>       | <0.001 |
| Number of flares                      |             |                                    |        | <b>1.54 (1.49-1.60)</b>       | <0.001 |

Bold indicates significance at level of p<0.003
