# Supplementary material for: Cohort study investigating gout flares and management in UK general practice
Source: Springer Nature journal article supplement (doi:10.1186/s12875-023-02201-7), 2023-11-22
Supplement: MOESM2 [file 26344592]

**Cohort study investigating gout flares and management in UK general practice**  
Codes used in database creation and frequency of occurrence in cohort of gout codes

| READ_CODE | Description                              | Contribution to cohort N(%) |
|-----------|------------------------------------------|-----------------------------|
| C34..00   | Gout                                     | 86956 (94.85)               |
| N023.00   | Gouty arthritis                          | 446 (0.49)                  |
| 1443      | H/O: gout                                | 2174 (2.37)                 |
| C34y200   | Gouty tophi of other sites               | 35 (0.04)                   |
| C34y500   | Gouty tophi of hand                      | 166 (0.18)                  |
| C340.00   | Gouty arthropathy                        | 164 (0.18)                  |
| C342.00   | Idiopathic gout                          | 39 (0.04)                   |
| N023z00   | Gouty arthritis NOS                      | 98 (0.11)                   |
| 6691      | Initial gout assessment                  | -                           |
| 669..00   | Gout monitoring                          | 811 (0.88)                  |
| 2D52.00   | O/E - auricle of ear - tophi             | 18 (0.02)                   |
| C345.00   | Gout due to impairment of renal function | 4 (0.00)                    |
| C34z.00   | Gout NOS                                 | 586 (0.64)                  |
| C34yz00   | Other specified gouty manifestation NOS  | 2 (0.00)                    |
| C34y.00   | Other specified gouty manifestation      | 16 (0.02)                   |
| 6693      | Joints gout affected                     | -                           |
| 6695      | Date gout treatment started              | 25 (0.03)                   |
| 6692      | Follow-up gout assessment                | 11 (0.01)                   |
| N023700   | Gouty arthritis of the ankle and foot    | 4 (0.00)                    |
| C34y000   | Gouty tophi of ear                       | 20 (0.02)                   |
| C344.00   | Drug-induced gout                        | 1 (0.00)                    |
| N023300   | Gouty arthritis of the forearm           | -                           |
| N023600   | Gouty arthritis of the lower leg         | -                           |
| C34y300   | Gouty iritis                             | -                           |
| N023400   | Gouty arthritis of the hand              | 1 (0.00)                    |
| 669Z.00   | Gout monitoring NOS                      | 7 (0.00)                    |
| C341.00   | Gouty nephropathy                        | -                           |
| G557300   | Gouty tophi of heart                     | -                           |
| N023x00   | Gouty arthritis of multiple sites        | 4 (0.00)                    |
| 6697      | Gout associated problems                 | -                           |
| C34y400   | Gouty neuritis                           | -                           |
| N023y00   | Gouty arthritis of other specified site  | -                           |
| C341z00   | Gouty nephropathy NOS                    | 1 (0.00)                    |
| 6696      | Date of last gout attack                 | -                           |
| N023100   | Gouty arthritis of the shoulder region   | 84 (0.09)                   |
| N023800   | Gouty arthritis of toe                   | -                           |
| C34y100   | Gouty tophi of heart                     | -                           |
| Nyu1700   | [X]Other secondary gout                  | -                           |
| N023200   | Gouty arthritis of the upper arm         | -                           |

## Oral steroids

### DRUG\_CODE DESCRIPTION

78144 Prednisolone 25mg tablets (Phoenix Healthcare Distribution Ltd) Prednisolone 25mg Tablet Oral

34660 Prednisolone 1mg tablets (Kent Pharmaceuticals Ltd) Prednisolone 1mg Tablet Oral

25272 Precortisyl 1mg Tablet (Hoechst Marion Roussel) Prednisolone 1mg Tablet Oral

41515 Prednisolone 5mg tablets (Teva UK Ltd) Prednisolone 5mg Tablet Oral

73678 Prednisolone 5mg gastro-resistant tablets (DE Pharmaceuticals) Prednisolone 5mg Gastro-resistant tablet Oral

74493 Prednisolone 5mg soluble tablets (Actavis UK Ltd) Prednisolone sodium phosphate 5mg Soluble tablet Oral

75001 Prednisolone 1mg tablets (DE Pharmaceuticals) Prednisolone 1mg Tablet Oral

58234 Prednisolone 10mg/5ml oral solution Prednisolone 2mg/1ml Oral solution Oral

54118 Prednisolone 25mg/5ml oral suspension Prednisolone 5mg/1ml Oral suspension Oral

60421 Prednisolone 5mg tablets (Strides Pharma UK Ltd) Prednisolone 5mg Tablet Oral

64007 Pevanti 10mg tablets (Advanz Pharma) Prednisolone 10mg Tablet Oral

32803 Prednisolone 5mg gastro-resistant tablets (Accord Healthcare Ltd) Prednisolone 5mg Gastro-resistant tablet Oral

34393 Prednisolone 5mg gastro-resistant tablets (Teva UK Ltd) Prednisolone 5mg Gastro-resistant tablet Oral

58987 Prednisolone 5mg gastro-resistant tablets (Phoenix Healthcare Distribution Ltd) Prednisolone 5mg Gastro-resistant tablet Oral

79930 Prednisolone 2.5mg gastro-resistant tablets (Phoenix Healthcare Distribution Ltd) Prednisolone 2.5mg Gastro-resistant tablet Oral

2704 Prednisolone 25mg tablets Prednisolone 25mg Tablet Oral

34631 Prednisolone 1mg Tablet (Co-Pharma Ltd) Prednisolone 1mg Tablet Oral

27959 PREDNISOLONE

27889 PREDNISOLONE

64128 Pevanti 5mg tablets (Advanz Pharma) Prednisolone 5mg Tablet Oral

53336 Prednisolone 25mg tablets (A A H Pharmaceuticals Ltd) Prednisolone 25mg Tablet Oral

59229 Dilacort 5mg gastro-resistant tablets (Auden McKenzie (Pharma Division) Ltd) Prednisolone 5mg Gastro-resistant tablet Oral

63082 Prednisolone 20mg tablets Prednisolone 20mg Tablet Oral

34748 Prednisolone 1mg tablets (Teva UK Ltd) Prednisolone 1mg Tablet Oral

63214 Prednisolone 5mg soluble tablets (Alliance Healthcare (Distribution) Ltd) Prednisolone sodium phosphate 5mg Soluble tablet Oral

73294 Prednisolone 2.5mg/5ml oral solution Prednisolone 500microgram/1ml Oral solution Oral

34914 Prednisolone 1mg Tablet (Celltech Pharma Europe Ltd) Prednisolone 1mg Tablet Oral

34978 Prednisolone 1mg tablets (Wockhardt UK Ltd) Prednisolone 1mg Tablet Oral

2368 Prednisolone 2.5mg tablet Prednisolone 2.5mg Tablets Oral

66645 Prednisolone 5mg/5ml oral solution unit dose (Logixx Pharma Solutions Ltd) Prednisolone 1mg/1ml Oral solution Oral

578 Prednisolone 1mg tablets Prednisolone 1mg Tablet Oral

41745 Prednisolone 25mg tablets (Zentiva) Prednisolone 25mg Tablet Oral

28376 Prednisolone 2.5mg Gastro-resistant tablet (Biorex Laboratories Ltd) Prednisolone 2.5mg Gastro-resistant tablet Oral

34452 Prednisolone 1mg tablets (A A H Pharmaceuticals Ltd) Prednisolone 1mg Tablet Oral

34781 Prednisolone 5mg tablets (Kent Pharmaceuticals Ltd) Prednisolone 5mg Tablet Oral

Prednisolone 2.5mg gastro-resistant tablets (Alliance Healthcare (Distribution) Ltd)  
 76020 Prednisolone 2.5mg Gastro-resistant tablet Oral  
 Dilacort 2.5mg gastro-resistant tablets (Crescent Pharma Ltd) Prednisolone 2.5mg Gastro-  
 80110 resistant tablet Oral  
 7584 PREDNISOLONE 4 MG TAB  
 64009 Pevanti 20mg tablets (Advanz Pharma) Prednisolone 20mg Tablet Oral  
 Deltacortril 2.5mg gastro-resistant tablets (Alliance Pharmaceuticals Ltd) Prednisolone 2.5mg  
 5913 Gastro-resistant tablet Oral  
 20095 Precortisyl forte 25mg Tablet (Aventis Pharma) Prednisolone 25mg Tablet Oral  
 65020 Prednisolone 25mg/5ml oral solution Prednisolone 5mg/1ml Oral solution Oral  
 44 Prednisolone 5mg gastro-resistant tablets Prednisolone 5mg Gastro-resistant tablet Oral  
 45302 Prednisolone 5mg Tablet (Biorex Laboratories Ltd) Prednisolone 5mg Tablet Oral  
 Prednisolone 1mg gastro-resistant tablets (A A H Pharmaceuticals Ltd) Prednisolone 1mg  
 72421 Gastro-resistant tablet Oral  
 Prednisolone 5mg gastro-resistant tablets (A A H Pharmaceuticals Ltd) Prednisolone 5mg  
 31532 Gastro-resistant tablet Oral  
 38407 Prednisolone 20mg tablet Prednisolone 20mg Tablets Oral  
 67076 Prednisolone 20mg/5ml oral solution Prednisolone 4mg/1ml Oral solution Oral  
 Dilacort 5mg gastro-resistant tablets (Teva UK Ltd) Prednisolone 5mg Gastro-resistant tablet  
 78129 Oral  
 28859 Deltastab 5mg Tablet (Waymade Healthcare Plc) Prednisolone 5mg Tablet Oral  
 Prednisolone 5mg soluble tablets (A A H Pharmaceuticals Ltd) Prednisolone sodium  
 61689 phosphate 5mg Soluble tablet Oral  
 Prednisolone 2.5mg gastro-resistant tablets (A A H Pharmaceuticals Ltd) Prednisolone 2.5mg  
 28375 Gastro-resistant tablet Oral  
 63791 Prednisolone 5mg/5ml oral solution unit dose Prednisolone 1mg/1ml Oral solution Oral  
 13522 PREDNISOLONE 2 MG TAB  
 61162 Prednisolone 5mg tablets (Waymade Healthcare Plc) Prednisolone 5mg Tablet Oral  
 Prednisolone 5mg gastro-resistant tablets (Alliance Pharmaceuticals Ltd) Prednisolone 5mg  
 67107 Gastro-resistant tablet Oral  
 Prednisolone 5mg Soluble tablet (Amdipharm Plc) Prednisolone sodium phosphate 5mg  
 47142 Soluble tablet Oral  
 75763 Prednisolone 5mg Tablet (Celltech Pharma Europe Ltd) Prednisolone 5mg Tablet Oral  
 Prednisolone 1mg tablets (Alliance Healthcare (Distribution) Ltd) Prednisolone 1mg Tablet  
 73553 Oral  
 59338 Prednisolone 1mg/5ml oral solution Prednisolone 200microgram/1ml Oral solution Oral  
 21417 Prednisolone 5mg tablets (A A H Pharmaceuticals Ltd) Prednisolone 5mg Tablet Oral  
 3059 PREDNISOLONE 50 MG TAB  
 Prednisolone 2.5mg/5ml oral suspension Prednisolone 500microgram/1ml Oral suspension  
 54434 Oral  
 53313 Prednisolone 20mg/5ml oral suspension Prednisolone 4mg/1ml Oral suspension Oral  
 65626 Prednisolone 10mg/5ml oral suspension Prednisolone 2mg/1ml Oral suspension Oral  
 34404 Prednisolone 1mg tablets (Accord Healthcare Ltd) Prednisolone 1mg Tablet Oral  
 Dilacort 5mg gastro-resistant tablets (Crescent Pharma Ltd) Prednisolone 5mg Gastro-  
 69568 resistant tablet Oral  
 Prednisolone 5mg soluble tablets (Advanz Pharma) Prednisolone sodium phosphate 5mg  
 19141 Soluble tablet Oral  
 Prednisolone 5mg gastro-resistant tablets (Waymade Healthcare Plc) Prednisolone 5mg  
 59912 Gastro-resistant tablet Oral

Prednisolone 5mg soluble tablets (Focus Pharmaceuticals Ltd) Prednisolone sodium  
 70603 phosphate 5mg Soluble tablet Oral  
 Prednisolone 2.5mg gastro-resistant tablets (Alliance Pharmaceuticals Ltd) Prednisolone  
 55480 2.5mg Gastro-resistant tablet Oral  
 Deltacortril 5mg gastro-resistant tablets (Alliance Pharmaceuticals Ltd) Prednisolone 5mg  
 5490 Gastro-resistant tablet Oral  
 51753 Prednisolone 1mg tablets (Strides Pharma UK Ltd) Prednisolone 1mg Tablet Oral  
 34109 Prednisolone 5 mg gastro-resistant tablet Prednisolone 5mg Enteric Coated Tablets Oral  
 Prednisolone 5mg gastro-resistant tablets (Alliance Healthcare (Distribution) Ltd)  
 66550 Prednisolone 5mg Gastro-resistant tablet Oral  
 58384 Prednisolone 1mg tablets (Almus Pharmaceuticals Ltd) Prednisolone 1mg Tablet Oral  
 69811 Prednisolone 30mg tablets (Actavis UK Ltd) Prednisolone 30mg Tablet Oral  
 2799 PREDNISOLONE 10 MG TAB  
 Dilacort 2.5mg gastro-resistant tablets (Auden McKenzie (Pharma Division) Ltd) Prednisolone  
 59283 2.5mg Gastro-resistant tablet Oral  
 9727 Prednisolone 50mg tablets Prednisolone 50mg Tablet Oral  
 95 Prednisolone 5mg tablets Prednisolone 5mg Tablet Oral  
 56891 Prednisolone 1mg tablets (Waymade Healthcare Plc) Prednisolone 1mg Tablet Oral  
 61132 Prednisolone 1mg tablets (Boston Healthcare Ltd) Prednisolone 1mg Tablet Oral  
 33988 Prednisolone 5mg Tablet (Co-Pharma Ltd) Prednisolone 5mg Tablet Oral  
 63066 Prednisolone 2.5mg tablets Prednisolone 2.5mg Tablet Oral  
 32835 Prednisolone 5mg tablets (Wockhardt UK Ltd) Prednisolone 5mg Tablet Oral  
 Prednisolone 5mg/5ml oral solution unit dose (A A H Pharmaceuticals Ltd) Prednisolone  
 67559 1mg/1ml Oral solution Oral

955 Prednisolone 5mg soluble tablets Prednisolone sodium phosphate 5mg Soluble tablet Oral  
 Prednisolone 2.5mg gastro-resistant tablets (Accord Healthcare Ltd) Prednisolone 2.5mg  
 34461 Gastro-resistant tablet Oral  
 67507 Prednisolone 30mg tablets Prednisolone 30mg Tablet Oral

557 Prednisolone 2.5mg gastro-resistant tablets Prednisolone 2.5mg Gastro-resistant tablet Oral  
 66914 Prednisolone 1mg gastro-resistant tablets Prednisolone 1mg Gastro-resistant tablet Oral

79091 Prednisolone 1.5mg/5ml oral solution Prednisolone 300microgram/1ml Oral solution Oral  
 Prednisolone 5mg Gastro-resistant tablet (Biorex Laboratories Ltd) Prednisolone 5mg Gastro-  
 33691 resistant tablet Oral  
 58000 Prednisolone 5mg tablets (Almus Pharmaceuticals Ltd) Prednisolone 5mg Tablet Oral  
 55024 Prednisolone 5mg/5ml oral solution Prednisolone 1mg/1ml Oral solution Oral  
 23512 Precortisyl 5mg Tablet (Hoechst Marion Roussel) Prednisolone 5mg Tablet Oral  
 69686 Pevanti 25mg tablets (Advanz Pharma) Prednisolone 25mg Tablet Oral  
 Prednisolone 5mg soluble tablets (DE Pharmaceuticals) Prednisolone sodium phosphate 5mg  
 78789 Soluble tablet Oral  
 Prednisolone 1mg/ml oral solution (Logixx Pharma Solutions Ltd) Prednisolone 1mg/1ml Oral  
 63549 solution Oral  
 Prednisolone 2.5mg gastro-resistant tablets (Waymade Healthcare Plc) Prednisolone 2.5mg  
 68497 Gastro-resistant tablet Oral  
 58369 Prednisolone 5mg tablets (Boston Healthcare Ltd) Prednisolone 5mg Tablet Oral  
 63172 Prednisolone 10mg tablets Prednisolone 10mg Tablet Oral  
 29333 Prednisolone 5mg tablets (Actavis UK Ltd) Prednisolone 5mg Tablet Oral

Prednisolone 1mg gastro-resistant tablets (Alliance Healthcare (Distribution) Ltd)  
80050 Prednisolone 1mg Gastro-resistant tablet Oral  
7710 PREDNISOLONE 15 MG TAB  
64008 Pevanti 2.5mg tablets (Advanz Pharma) Prednisolone 2.5mg Tablet Oral  
74239 Prednisolone 15mg/5ml oral solution Prednisolone 3mg/1ml Oral solution Oral  
33990 Prednisolone 5mg Tablet (IVAX Pharmaceuticals UK Ltd) Prednisolone 5mg Tablet Oral

64416 Prednisolone 10mg/ml oral solution sugar free Prednisolone 10mg/1ml Oral solution Oral  
Prednisolone 5mg soluble tablets (Phoenix Labs Ltd) Prednisolone sodium phosphate 5mg  
77760 Soluble tablet Oral  
64221 Prednisolone 5mg/5ml oral suspension Prednisolone 1mg/1ml Oral suspension Oral  
27962 Deltastab 1mg Tablet (Waymade Healthcare Plc) Prednisolone 1mg Tablet Oral  
81168 Prednisolone 1mg gastro-resistant tablets (Alliance Pharmaceuticals Ltd)  
Prednisolone 2.5mg gastro-resistant tablets (Mawdsley-Brooks & Company  
81344 Ltd)Prednisolone2.5mgGastro-resistant tabletOral  
81369 Prednisolone 5mg tablets (Genesis Pharmaceuticals Ltd)Prednisolone5mgTabletOral

82367 Prednisolone 5mg tablets (Phoenix Healthcare Distribution Ltd)Prednisolone5mgTabletOral  
Prednisolone 2.5mg gastro-resistant tablets (Almus Pharmaceuticals  
82432 Ltd)Prednisolone2.5mgGastro-resistant tabletOral  
Prednisolone 10mg/ml oral solution sugar free (A A H Pharmaceuticals  
82675 Ltd)Prednisolone10mg/1mlOral solutionOral

82743 Prednisolone 1.5mg/5ml oral suspensionPrednisolone300microgram/1mlOral suspensionOral

### **Intra-articular injection**

READ\_CODE DESCRIPTION

7K6Z700 Injection of steroid into knee joint  
7K6Z500 Injection of steroid into shoulder joint  
7L19100 Injection of steroid for local action NEC  
7K6Z600 Injection of steroid into ankle joint  
7G2A100 Injection of steroid into subcutaneous tissue  
7K6ZF00 Injection of steroid into wrist joint  
7L19F00 Injection of steroid NEC  
7K6ZG00 Injection of steroid into carpometacarpal joint of thumb  
7K6ZH00 Injection of steroid into carpometacarpal joint of finger  
7K6ZJ00 Injection of steroid into hip joint  
7K6ZM00 Injection of steroid into elbow joint

**Joint aspiration**

| READ_CODE | DESCRIPTION                         |
|-----------|-------------------------------------|
| 7K6Z800   | Aspiration of fluid from knee joint |
| 7K6U400   | Aspiration of joint NEC             |
| 816y.00   | Other therapeutic aspiration        |

## Oral NSAIDs

### DRUG\_CODE\_ DESCRIPTION

33669 Diclofenac 50mg Gastro-resistant tablet (Genus Pharmaceuticals Ltd) Diclofenac sodium 50mg Gastro-resistant tablet Oral

33801 Opustan 250mg Capsule (Opus Pharmaceuticals Ltd) Mefenamic acid 250mg Capsule Oral

3182 Froben 50mg tablets (Abbott Laboratories Ltd) Flurbiprofen 50mg Tablet Oral

14678 Defanac sr 100mg Modified-release tablet (Ranbaxy (UK) Ltd) Diclofenac sodium 100mg Modified-release tablet Oral

50602 Diclofenac potassium 50mg tablets (Alliance Healthcare (Distribution) Ltd) Diclofenac potassium 50mg Tablet Oral

40401 Naproxen 250mg gastro-resistant tablets (IVAX Pharmaceuticals UK Ltd) Naproxen 250mg Gastro-resistant tablet Oral

29037 Valdic 100 Retard tablets (Fannin UK Ltd) Diclofenac sodium 100mg Modified-release tablet Oral

2387 Arthrotec 75 gastro-resistant tablets (Pfizer Ltd) Diclofenac sodium/Misoprostol 75mg + 200microgram Gastro-resistant tablet Oral

34850 Ibuprofen 600mg tablets (Teva UK Ltd) Ibuprofen 600mg Tablet Oral

13818 Nabumetone 500mg tablets (Accord Healthcare Ltd) Nabumetone 500mg Tablet Oral

30164 Lemsip Cold and Flu Sinus 12 Hr Ibuprofen + Pseudoephedrine modified-release capsules (Reckitt Benckiser Healthcare (UK) Ltd) Pseudoephedrine hydrochloride/Ibuprofen 45mg + 300mg Modified-release capsule Oral

46967 Mefenamic acid 250mg Capsule (Sandoz Ltd) Mefenamic acid 250mg Capsule Oral

17532 Dicloflex Retard 100mg tablets (Kent Pharmaceuticals Ltd) Diclofenac sodium 100mg Modified-release tablet Oral

35653 Etopan XL 600mg tablets (Sun Pharmaceutical Industries Europe B.V.) Etodolac 600mg Modified-release tablet Oral

78779 Ketonal 50mg Capsule (Lagap) Ketoprofen 50mg Capsule Oral

46848 Naproxen 500mg Gastro-resistant tablet (Almus Pharmaceuticals Ltd) Naproxen 500mg Gastro-resistant tablet Oral

53700 Naproxen 250mg gastro-resistant tablets (Alliance Healthcare (Distribution) Ltd) Naproxen 250mg Gastro-resistant tablet Oral

3326 Oruvail 100mg Modified-release capsule (Hawgreen Ltd) Ketoprofen 100mg Modified-release capsule Oral

35935 Meloxicam 7.5mg tablets (Somex Pharma) Meloxicam 7.5mg Tablet Oral

57006 Diclofenac sodium 25mg gastro-resistant tablets (Phoenix Healthcare Distribution Ltd) Diclofenac sodium 25mg Gastro-resistant tablet Oral

51293 Diclofenac potassium 50mg tablets (Phoenix Healthcare Distribution Ltd) Diclofenac potassium 50mg Tablet Oral

42108 Ibuprofen 200mg tablets (OBG Pharmaceuticals Ltd) Ibuprofen 200mg Tablet Oral

78172 Naproxen 250mg tablets (IVAX Pharmaceuticals UK Ltd) Naproxen 250mg Tablet Oral

18527 Mandafen 400mg tablets (M & A Pharmachem Ltd) Ibuprofen 400mg Tablet Oral

612 Dicloflex 25mg gastro-resistant tablets (Dexcel-Pharma Ltd) Diclofenac sodium 25mg Gastro-resistant tablet Oral



71989 Meloxicam 15mg tablets (Almus Pharmaceuticals Ltd) Meloxicam 15mg Tablet Oral  
Diclofenac potassium 50mg tablets (A A H Pharmaceuticals Ltd) Diclofenac potassium  
48059 50mg Tablet Oral  
736 Indometacin 50mg capsules Indometacin 50mg Capsule Oral  
Voltarol 50mg dispersible tablets (DE Pharmaceuticals) Diclofenac sodium 50mg  
50058 Dispersible tablet Oral  
1073 Mefenamic acid 500mg tablets Mefenamic acid 500mg Tablet Oral  
63612 Suprol 200mg Capsule (Lorex Synthelabo Ltd) 200mg Capsule  
20016 Tolmetin 400mg Capsule Tolmetin Sodium 400mg Capsule Oral  
12075 Mobiflex 20mg Tablet (Roche Products Ltd) Tenoxicam 20mg Tablet Oral  
Diclofenac 50mg dispersible tablets sugar free (DE Pharmaceuticals) Diclofenac  
57162 sodium 50mg Dispersible tablet Oral  
66544 Ibuprofen 400mg tablets (DE Pharmaceuticals) Ibuprofen 400mg Tablet Oral  
34527 Ibuprofen 200mg tablets (Zentiva) Ibuprofen 200mg Tablet Oral  
Nurofen Express 512mg tablets (Reckitt Benckiser Healthcare (UK) Ltd) Ibuprofen  
44483 sodium dihydrate 400mg Tablet Oral  
Naproxen 250mg effervescent tablets sugar free Naproxen 250mg Effervescent  
65862 tablet Oral  
Ketoprofen 200mg modified-release capsules (A A H Pharmaceuticals Ltd)  
77293 Ketoprofen 200mg Modified-release capsule Oral  
Timpron 250mg Gastro-resistant tablet (Berk Pharmaceuticals Ltd) Naproxen 250mg  
31429 Gastro-resistant tablet Oral  
Rheuflex 500mg Tablet (Goldshield Pharmaceuticals Ltd) Naproxen 500mg Tablet  
28816 Oral  
  
53345 Voltarol Rapid 50mg tablets (Lexon (UK) Ltd) Diclofenac potassium 50mg Tablet Oral  
Naproxen 250mg gastro-resistant tablets (Teva UK Ltd) Naproxen 250mg Gastro-  
34290 resistant tablet Oral  
Nurofen Maximum Strength Migraine Pain 684mg caplets (Reckitt Benckiser  
33935 Healthcare (UK) Ltd) Ibuprofen lysine 400mg Tablet Oral  
Diclofenac sodium 50mg gastro-resistant tablets (Kent Pharmaceuticals Ltd)  
27055 Diclofenac sodium 50mg Gastro-resistant tablet Oral  
Indometacin 50mg Capsule (Meridian Healthcare (UK) Ltd) Indometacin 50mg  
36577 Capsule Oral  
  
21815 Arthrofen 600 tablets (Ashbourne Pharmaceuticals Ltd) Ibuprofen 600mg Tablet Oral  
Diclofenac sodium 100mg modified-release tablets (Phoenix Healthcare Distribution  
67220 Ltd) Diclofenac sodium 100mg Modified-release tablet Oral  
5175 Celebrex 100mg capsules (Upjohn UK Ltd) Celecoxib 100mg Capsule Oral  
Jomethid XL 200mg capsules (Actavis UK Ltd) Ketoprofen 200mg Modified-release  
30327 capsule Oral  
Ketoprofen 200mg Modified-release capsule (Actavis UK Ltd) Ketoprofen 200mg  
33568 Modified-release capsule Oral  
78096 Etoricoxib 60mg tablets (Torrent Pharma (UK) Ltd) Etoricoxib 60mg Tablet Oral  
Voltarol Rapid 50mg tablets (Novartis Pharmaceuticals UK Ltd) Diclofenac potassium  
5085 50mg Tablet Oral  
360 Brufen 100mg/5ml syrup (Mylan) Ibuprofen 20mg/1ml Oral suspension Oral  
Brufen 600mg effervescent granules sachets (Necessity Supplies Ltd) Ibuprofen  
55009 600mg Effervescent granules Oral

7481 Lederfen 450mg Tablet (Wyeth Pharmaceuticals) Fenbufen 450mg Tablet Oral  
 Diclofenac sodium 25mg gastro-resistant tablets (Waymade Healthcare Plc)

74451 Diclofenac sodium 25mg Gastro-resistant tablet Oral

72925 Celecoxib 100mg capsules (A A H Pharmaceuticals Ltd) Celecoxib 100mg Capsule Oral  
 Diclofenac 100mg Modified-release tablet (IVAX Pharmaceuticals UK Ltd) Diclofenac  
 42793 sodium 100mg Modified-release tablet Oral

2366 Flurbiprofen 100mg tablets Flurbiprofen 100mg Tablet Oral

34595 Mefenamic acid 500mg tablets (Zentiva) Mefenamic acid 500mg Tablet Oral

42604 Mobiflex 20mg tablets (Mylan) Tenoxicam 20mg Tablet Oral  
 Ibuprofen 300mg / Pseudoephedrine 45mg modified-release capsules  
 Pseudoephedrine hydrochloride/Ibuprofen 45mg + 300mg Modified-release capsule  
 28172 Oral

526 Aceclofenac 100mg tablets Aceclofenac 100mg Tablet Oral

51614 Ibuprofen 200mg caplets (Lloyds Pharmacy Ltd) Ibuprofen 200mg Tablet Oral  
 Stirlescent 250mg effervescent tablets (Stirling Anglian Pharmaceuticals Ltd)

67117 Naproxen 250mg Effervescent tablet Oral

Misofen 50mg/200microgram gastro-resistant tablets (Morningside Healthcare Ltd)

64595 Diclofenac sodium/Misoprostol 50mg + 200microgram Gastro-resistant tablet Oral  
 Lofensaid Retard 75 tablets (Opus Pharmaceuticals Ltd) Diclofenac sodium 75mg  
 16286 Modified-release tablet Oral

66323 Ebrelin 300mg capsules (Ranbaxy (UK) Ltd) Etodolac 300mg Capsule Oral  
 Ibuprofen 200mg / Codeine 12.8mg tablets Ibuprofen/Codeine phosphate 200mg +  
 11554 12.8mg Tablet Oral

1866 Naprosyn 500mg tablets (Atnahs Pharma UK Ltd) Naproxen 500mg Tablet Oral

21811 Lidifen 200mg Tablet (Berk Pharmaceuticals Ltd) Ibuprofen 200mg Tablet Oral  
 Apsifen -f 600mg Tablet (Approved Prescription Services Ltd) Ibuprofen 600mg  
 31469 Tablet Oral

Ketovail 100mg modified-release capsules (Teva UK Ltd) Ketoprofen 100mg Modified-  
 17818 release capsule Oral

Ketoprofen 100mg capsules (A A H Pharmaceuticals Ltd) Ketoprofen 100mg Capsule  
 40141 Oral

20059 Tiaprofenic acid 300mg sachets Tiaprofenic Acid 300mg Sachets Oral  
 Mefenamic acid 250mg capsules (Essential Generics Ltd) Mefenamic acid 250mg  
 57007 Capsule Oral

34143 Naprosyn 375 Tablet (Roche Products Ltd) Naproxen Tablet Oral  
 Diclofenac 25mg Gastro-resistant tablet (Almus Pharmaceuticals Ltd) Diclofenac  
 73131 sodium 25mg Gastro-resistant tablet Oral

Fenbid 300mg Spansules (Mercury Pharma Group Ltd) Ibuprofen 300mg Modified-  
 10785 release capsule Oral

32090 Mefenamic acid 500mg tablets (Actavis UK Ltd) Mefenamic acid 500mg Tablet Oral  
 Mefenamic acid 500mg tablets (Alliance Healthcare (Distribution) Ltd) Mefenamic  
 57297 acid 500mg Tablet Oral

34536 Ibuprofen 400mg tablets (IVAX Pharmaceuticals UK Ltd) Ibuprofen 400mg Tablet Oral  
 Cuprofen for Children 100mg/5ml oral suspension (SSL International Plc) Ibuprofen  
 24469 20mg/1ml Oral suspension Oral

26234 Flamatrol 10mg Capsule (Berk Pharmaceuticals Ltd) Piroxicam 10mg Capsule Oral  
Ibuprofen and codeine 200mg + 12.5mg Tablet Codeine Phosphate/Ibuprofen 200mg  
12709 + 12.5mg Tablet Oral  
Diclovol 75mg SR tablets (Arun Pharmaceuticals Ltd) Diclofenac sodium 75mg  
14084 Modified-release tablet Oral  
Nycopren 250mg gastro-resistant tablets (Ardern Healthcare Ltd) Naproxen 250mg  
3496 Gastro-resistant tablet Oral  
Calprofen 100mg/5ml oral suspension 5ml sachets (McNeil Products Ltd) Ibuprofen  
56441 20mg/1ml Oral suspension Oral  
Ibuprofen 200mg tablets (Mawdsley-Brooks & Company Ltd) Ibuprofen 200mg  
68018 Tablet Oral  
21821 Lidifen f 600mg Tablet (Berk Pharmaceuticals Ltd) Ibuprofen 600mg Tablet Oral  
Nurofen for Children 100mg chewable capsules (Reckitt Benckiser Healthcare (UK)  
73040 Ltd) Ibuprofen 100mg Chewable capsule Oral  
Larafen CR 200mg capsules (Ennogen Pharma Ltd) Ketoprofen 200mg Modified-  
32227 release capsule Oral

54137 Ibuprofen 400mg tablets (Aspar Pharmaceuticals Ltd) Ibuprofen 400mg Tablet Oral  
Diclofenac sodium 75mg modified-release capsules (Waymade Healthcare Plc)  
59880 Diclofenac sodium 75mg Modified-release capsule Oral  
Ibuprofen sodium dihydrate 400mg tablets Ibuprofen sodium dihydrate 400mg  
66567 Tablet Oral  
5254 Celecoxib 200mg capsules Celecoxib 200mg Capsule Oral  
Mefenamic acid 500mg tablets (A A H Pharmaceuticals Ltd) Mefenamic acid 500mg  
32105 Tablet Oral  
Pseudoephedrine 45mg with ibuprofen 300mg modified-release capsule  
Ibuprofen/Pseudoephedrine Hydrochloride 45mg + 300mg Modified Release  
27438 Capsules Oral  
Mefenamic acid 250mg Capsule (Berk Pharmaceuticals Ltd) Mefenamic acid 250mg  
34898 Capsule Oral  
43032 Inoven 200mg Tablet (Janssen-Cilag Ltd) Ibuprofen 200mg Tablet Oral  
54660 Diclofenac sodium 50mg capsules Diclofenac Sodium  
Dysman 500 tablets (Ashbourne Pharmaceuticals Ltd) Mefenamic acid 500mg Tablet  
13459 Oral  
14333 Ibuprofen 400mg capsules Ibuprofen 400mg Capsule Oral  
21045 Ibuprofen 400mg Tablet (Alfred Benzon (UK) Ltd) Ibuprofen 400mg Tablet Oral  
13347 Alrheumat 50mg Capsule (Bayer Plc) Ketoprofen 50mg Capsule Oral  
928 Diclofenac sodium 25mg tablets Diclofenac Sodium 25mg Tablets Oral  
Meloxicam 15mg orodispersible tablets sugar free Meloxicam 15mg Orodispersible  
57370 tablet Oral  
Fenpaed 100mg/5ml Oral suspension (Pinewood Healthcare) Ibuprofen 100mg/5ml  
18820 Oral Suspension Oral  
70393 Naproxen 250mg tablets (DE Pharmaceuticals) Naproxen 250mg Tablet Oral  
53576 Arcoxia 120mg tablets (DE Pharmaceuticals) Etoricoxib 120mg Tablet Oral  
Mendys 250mg Capsule (Kent Pharmaceuticals Ltd) Mefenamic acid 250mg Capsule  
36260 Oral  
Nurofen meltlets lemon 200mg Orodispersible tablet (Reckitt Benckiser Healthcare  
18812 (UK) Ltd) Ibuprofen 200mg Orodispersible tablet Oral

Voltarol Pain-eze Extra Strength 25mg tablets (Novartis Consumer Health UK Ltd)  
 47820 Diclofenac potassium 25mg Tablet Oral  
 Axorid 200mg/20mg modified-release capsules (Meda Pharmaceuticals Ltd)  
 41365 Omeprazole/Ketoprofen 20mg + 200mg Modified-release capsule Oral  
 34961 Ibuprofen 600mg tablets (Sandoz Ltd) Ibuprofen 600mg Tablet Oral  
 43541 Piroxicam 10mg capsules (Actavis UK Ltd) Piroxicam 10mg Capsule Oral  
 Timpron 500mg Gastro-resistant tablet (Berk Pharmaceuticals Ltd) Naproxen 500mg  
 26231 Gastro-resistant tablet Oral  
 13380 Clinoril 200mg tablets (Merck Sharp & Dohme Ltd) Sulindac 200mg Tablet Oral  
 55582 Celebrex 200mg capsules (Lexon (UK) Ltd) Celecoxib 200mg Capsule Oral  
 14385 Cuprofen 200mg Tablet (SSL International Plc) Ibuprofen 200mg Tablet Oral  
 Berlind 75 Retard capsules (Tillomed Laboratories Ltd) Indometacin 75mg Modified-  
 77102 release capsule Oral  
 Lofensaid 50mg gastro-resistant tablets (Opus Pharmaceuticals Ltd) Diclofenac  
 18798 sodium 50mg Gastro-resistant tablet Oral  
 Ibuprofen with pseudoephedrine hc 400mg + 60mg Liquid  
 28822 Ibuprofen/Pseudoephedrine Hydrochloride 400mg + 60mg Liquid Oral  
  
 71027 Piroxicam 10mg capsules (Sigma Pharmaceuticals Plc) Piroxicam 10mg Capsule Oral  
 9822 Arcoxia 120mg tablets (Merck Sharp & Dohme Ltd) Etoricoxib 120mg Tablet Oral  
 Piroxicam 20mg capsules (IVAX Pharmaceuticals UK Ltd) Piroxicam 20mg Capsule  
 41623 Oral  
 Diclofenac 10mg/5ml oral suspension Diclofenac sodium 2mg/1ml Oral suspension  
 61762 Oral  
 Dicloflex 50mg Gastro-resistant tablet (Ratiopharm UK Ltd) Diclofenac sodium 50mg  
 9886 Gastro-resistant tablet Oral  
 First Resort Double Action Pain Relief 12.5mg tablets (Actavis UK Ltd) Diclofenac  
 45814 potassium 12.5mg Tablet Oral  
 Ketoprofen 200mg modified-release capsules Ketoprofen 200mg Modified-release  
 3043 capsule Oral  
 Pranoxen continus 375mg Tablet (Napp Pharmaceuticals Ltd) Naproxen 375mg  
 21843 Tablet Oral  
 15159 Tolfenamic acid 200mg Capsule Tolfenamic Acid 200mg Capsule Oral  
 Dicloflex sr 75mg Tablet (Ratiopharm UK Ltd) Diclofenac sodium 75mg Modified-  
 17491 release tablet Oral  
 Ibuprofen 100mg/5ml oral suspension 5ml sachets sugar free Ibuprofen 20mg/1ml  
 48562 Oral suspension Oral  
 Valenac ec 50mg Gastro-resistant tablet (Shire Pharmaceuticals Ltd) Diclofenac  
 25283 sodium 50mg Gastro-resistant tablet Oral  
 Nurofen 200mg tablets (Reckitt Benckiser Healthcare (UK) Ltd) Ibuprofen 200mg  
 36650 Tablet Oral  
 Nurofen Express 684mg caplets (Reckitt Benckiser Healthcare (UK) Ltd) Ibuprofen  
 36787 lysine 400mg Tablet Oral  
  
 78149 Ibuprofen 600mg Tablet (IVAX Pharmaceuticals UK Ltd) Ibuprofen 600mg Tablet Oral  
  
 56762 Naproxen 100mg/5ml oral suspension Naproxen 20mg/1ml Oral suspension Oral  
 60772 Indometacin 25mg/5ml oral solution Indometacin 5mg/1ml Oral solution Oral  
 33321 Indometacin 50mg capsules (Actavis UK Ltd) Indometacin 50mg Capsule Oral  
 10169 Brexidol 20mg tablets (Chiesi Ltd) Piroxicam betadex 20mg Tablet Oral

Naprosyn EC 250mg tablets (Atrahs Pharma UK Ltd) Naproxen 250mg Gastro-  
 3972 resistant tablet Oral  
 77260 Meloxicam 15mg tablets (Teva UK Ltd) Meloxicam 15mg Tablet Oral  
 Tolectin 200mg Capsule (Cilag Pharmaceuticals Ltd) Tolmetin Sodium 200mg Capsule  
 18640 Oral  
 29704 Paxofen 200mg Tablet (M A Steinhard Ltd) Ibuprofen 200mg Tablet Oral  
 40484 Orudis 100mg capsules (Sanofi) Ketoprofen 100mg Capsule Oral  
 Diclofenac sodium 75mg modified-release capsules (Waymade Healthcare Plc)  
 71064 Diclofenac sodium 75mg Modified-release capsule Oral  
 Arthrotec 50 gastro-resistant tablets (Pfizer Ltd) Diclofenac sodium/Misoprostol  
 162 50mg + 200microgram Gastro-resistant tablet Oral  
 Slofenac 75mg SR tablets (Sterwin Medicines) Diclofenac sodium 75mg Modified-  
 19382 release tablet Oral  
 Ketoprofen 100mg / Omeprazole 20mg modified-release capsules  
 41364 Ketoprofen/Omeprazole 100mg + 20mg Modified-release capsule Oral  
 Ibuprofen 100mg/5ml oral suspension sugar free (DE Pharmaceuticals) Ibuprofen  
 73112 20mg/1ml Oral suspension Oral  
  
 78343 Naproxen 500mg tablets (Noumed Life Sciences Ltd) Naproxen 500mg Tablet Oral  
 1086 Ibuprofen 600mg tablets Ibuprofen 600mg Tablet Oral  
 Indocid R 75mg capsules (Merck Sharp & Dohme Ltd) Indometacin 75mg Modified-  
 1496 release capsule Oral  
 29465 Piroxicam 20mg capsules (Actavis UK Ltd) Piroxicam 20mg Capsule Oral  
 Tolectin 400mg Capsule (Cilag Pharmaceuticals Ltd) Tolmetin Sodium 400mg Capsule  
 10711 Oral  
 43904 Feminax Express 342mg tablets (Bayer Plc) Ibuprofen lysine 200mg Tablet Oral  
 Ketoprofen 200mg Modified-release capsule (Generics (UK) Ltd) Ketoprofen 200mg  
 46920 Modified-release capsule Oral  
 661 Naproxen 250mg tablets Naproxen 250mg Tablet Oral  
  
 56039 Ibuprofen 600mg tablets (Waymade Healthcare Plc) Ibuprofen 600mg Tablet Oral  
 Fenactol SR 75mg tablets (Discovery Pharmaceuticals) Diclofenac sodium 75mg  
 17126 Modified-release tablet Oral  
 Pardelprin MR 75mg capsules (Actavis UK Ltd) Indometacin 75mg Modified-release  
 23204 capsule Oral  
 Feminax Ultra 250mg gastro-resistant tablets (Bayer Plc) Naproxen 250mg Gastro-  
 38511 resistant tablet Oral  
 Acoflam 75mg SR tablets (Mercury Pharma Group Ltd) Diclofenac sodium 75mg  
 75442 Modified-release tablet Oral  
  
 24193 Imbrilon 25mg Capsule (Berk Pharmaceuticals Ltd) Indometacin 25mg Capsule Oral  
 Nurofen Express 400mg liquid capsules (Reckitt Benckiser Healthcare (UK) Ltd)  
 37648 Ibuprofen 400mg Capsule Oral  
 Volsaid Retard 75 tablets (Chiesi Ltd) Diclofenac sodium 75mg Modified-release  
 4506 tablet Oral  
 Diclofenac sodium 25mg gastro-resistant tablets (Sterwin Medicines) Diclofenac  
 62636 sodium 25mg Gastro-resistant tablet Oral  
 78072 Etoricoxib 120mg tablets (Accord Healthcare Ltd) Etoricoxib 120mg Tablet Oral  
 Naproxen 250mg gastro-resistant tablets (Ranbaxy (UK) Ltd) Naproxen 250mg Gastro-  
 70698 resistant tablet Oral

Diclofenac potassium 50mg tablets (Focus Pharmaceuticals Ltd) Diclofenac  
 52338 potassium 50mg Tablet Oral  
 65025 Ibuprofen 400mg tablets (Crescent Pharma Ltd) Ibuprofen 400mg Tablet Oral  
 Anadin LiquiFast 400mg capsules (Pfizer Consumer Healthcare Ltd) Ibuprofen 400mg  
 43456 Capsule Oral  
 Diclofenac 100mg Modified-release capsule (Sandoz Ltd) Diclofenac sodium 100mg  
 34744 Modified-release capsule Oral  
 Oruvail 100 modified-release capsules (Sanofi) Ketoprofen 100mg Modified-release  
 40215 capsule Oral  
 Naproxen 500mg Gastro-resistant tablet (Sterwin Medicines) Naproxen 500mg  
 31945 Gastro-resistant tablet Oral  
 Diclofenac sodium 25mg gastro-resistant tablets (Mylan) Diclofenac sodium 25mg  
 31944 Gastro-resistant tablet Oral  
 76041 Ibular 400mg tablets (Ennogen Pharma Ltd) Ibuprofen 400mg Tablet Oral  
  
 16001 Ibuprofen 200mg tablets (A A H Pharmaceuticals Ltd) Ibuprofen 200mg Tablet Oral  
 24137 Indometacin 25mg capsules (Actavis UK Ltd) Indometacin 25mg Capsule Oral  
 Voltarol Rapid 50mg tablets (DE Pharmaceuticals) Diclofenac potassium 50mg Tablet  
 69477 Oral  
 Cuprofen PLUS tablets (SSL International Plc) Ibuprofen/Codeine phosphate 200mg +  
 37816 12.8mg Tablet Oral  
 Rhumalgan SR 75mg capsules (Actavis UK Ltd) Diclofenac sodium 75mg Modified-  
 56898 release capsule Oral  
 Chloraprep with tint solution (CareFusion U.K. Ltd) Isopropyl Alcohol/Chlorhexidine  
 46656 Gluconate Oral Solution Topical  
 Indometacin 25mg capsules (Waymade Healthcare Plc) Indometacin 25mg Capsule  
 79433 Oral  
 Diclofenac sodium 75mg modified-release capsules (DE Pharmaceuticals) Diclofenac  
 60443 sodium 75mg Modified-release capsule Oral  
 Dicloflex 25mg gastro-resistant tablets (Almus Pharmaceuticals Ltd) Diclofenac  
 40756 sodium 25mg Gastro-resistant tablet Oral  
 12122 Orudis 50mg Capsule (Hawgreen Ltd) Ketoprofen 50mg Capsule Oral  
 259 Mefenamic acid 250mg capsules Mefenamic acid 250mg Capsule Oral  
 Mefenamic acid 500mg tablets (Sigma Pharmaceuticals Plc) Mefenamic acid 500mg  
 51827 Tablet Oral  
 Rhumalgan SR 75mg capsules (Almus Pharmaceuticals Ltd) Diclofenac sodium 75mg  
 47501 Modified-release capsule Oral  
 Diclofenac sodium 50mg gastro-resistant tablets (A A H Pharmaceuticals Ltd)  
 26165 Diclofenac sodium 50mg Gastro-resistant tablet Oral  
 389 Ketoprofen 50mg capsules Ketoprofen 50mg Capsule Oral  
 Diclofenac sodium 50mg gastro-resistant tablets (Waymade Healthcare Plc)  
 58048 Diclofenac sodium 50mg Gastro-resistant tablet Oral  
 474 Celecoxib 100mg capsules Celecoxib 100mg Capsule Oral  
 74952 Arcoxia 60mg tablets (Waymade Healthcare Plc) Etoricoxib 60mg Tablet Oral  
 1755 Piroxicam 20mg capsules Piroxicam 20mg Capsule Oral  
 8969 Lodine 300mg Capsule (Shire Pharmaceuticals Ltd) Etodolac 300mg Capsule Oral  
 Indotard 75mg Modified-release capsule (Galen Ltd) Indometacin 75mg Modified-  
 76608 release capsule Oral  
  
 68685 Naproxen 250mg tablets (Waymade Healthcare Plc) Naproxen 250mg Tablet Oral

34769 Naproxen 500mg tablets (A A H Pharmaceuticals Ltd) Naproxen 500mg Tablet Oral  
Diclomax Retard 100mg capsules (Waymade Healthcare Plc) Diclofenac sodium  
71362 100mg Modified-release capsule Oral  
Dicloflex sr 100mg Tablet (Teva UK Ltd) Diclofenac sodium 100mg Modified-release  
48218 tablet Oral  
4216 Brufen 600mg tablets (Mylan) Ibuprofen 600mg Tablet Oral  
26216 Timpron 500mg Tablet (Berk Pharmaceuticals Ltd) Naproxen 500mg Tablet Oral  
Nurofen Express Soluble 400mg oral powder sachets (Reckitt Benckiser Healthcare  
55153 (UK) Ltd) Ibuprofen lysine 400mg Powder Oral  
Ibuprofen 100mg/5ml oral suspension sugar free (Teva UK Ltd) Ibuprofen 20mg/1ml  
26970 Oral suspension Oral  
Nurofen Joint & Back Pain Relief 200mg capsules (Reckitt Benckiser Healthcare (UK)  
70878 Ltd) Ibuprofen 200mg Capsule Oral  
Indometacin 50mg Capsule (Celltech Pharma Europe Ltd) Indometacin 50mg Capsule  
75765 Oral  
Ibuprofen 100mg/5ml oral suspension sugar free (Sigma Pharmaceuticals Plc)  
52617 Ibuprofen 20mg/1ml Oral suspension Oral  
Naproxen 500mg gastro-resistant tablets (A A H Pharmaceuticals Ltd) Naproxen  
34743 500mg Gastro-resistant tablet Oral  
Diclofenac 75mg Modified-release tablet (IVAX Pharmaceuticals UK Ltd) Diclofenac  
33645 sodium 75mg Modified-release tablet Oral  
Diclofenac sodium 100mg modified-release tablets Diclofenac Sodium 100mg  
1984 Modified Release Tablet Oral  
Ibuprofen for Children 100mg/5ml oral suspension (Galpharm International Ltd)  
49266 Ibuprofen 20mg/1ml Oral suspension Oral  
Dexomon 75mg SR tablets (Hillcross Pharmaceuticals Ltd) Diclofenac sodium 75mg  
31383 Modified-release tablet Oral  
Diclomax sr 75mg Modified-release capsule (Provalis Healthcare Ltd) Diclofenac  
3421 sodium 75mg Modified-release capsule Oral  
Indoflex 25mg Capsule (Unimed Pharmaceuticals Ltd) Indometacin 25mg Capsule  
44313 Oral  
Piroxicam 20mg dispersible tablets (A A H Pharmaceuticals Ltd) Piroxicam 20mg  
67608 Dispersible tablet Oral  
Dicloflex 50mg gastro-resistant tablets (Almus Pharmaceuticals Ltd) Diclofenac  
39823 sodium 50mg Gastro-resistant tablet Oral  
Diclofenac 50mg Tablet (C P Pharmaceuticals Ltd) Diclofenac sodium 50mg Gastro-  
33559 resistant tablet Oral  
Diclomax SR 75mg capsules (Waymade Healthcare Plc) Diclofenac sodium 75mg  
74028 Modified-release capsule Oral  
59562 Ibuprofen 600mg tablets (Boston Healthcare Ltd) Ibuprofen 600mg Tablet Oral  
Ketoprofen 200mg / Omeprazole 20mg modified-release capsules  
41367 Omeprazole/Ketoprofen 20mg + 200mg Modified-release capsule Oral  
4911 Ibuprofen 400mg Granules Ibuprofen 400mg Granules Oral  
Diclofenac 25mg Gastro-resistant tablet (Genus Pharmaceuticals Ltd) Diclofenac  
34362 sodium 25mg Gastro-resistant tablet Oral  
Indomod 75mg modified-release capsules (Pfizer Ltd) Indometacin 75mg Modified-  
18662 release capsule Oral  
Oruvail 200 modified-release capsules (Dowelhurst Ltd) Ketoprofen 200mg Modified-  
74005 release capsule Oral

3710 Piroxicam 20mg dispersible tablets Piroxicam 20mg Dispersible tablet Oral  
 Berlind 75mg Modified-release capsule (Neo Laboratories Ltd) Indometacin 75mg  
 76583 Modified-release capsule Oral  
 10149 Ibuprofen 200mg capsules Ibuprofen 200mg Capsule Oral  
 50343 Feldene 0.5% gel (DE Pharmaceuticals) Piroxicam 5mg/1gram Gel Cutaneous  
 Ketoprofen cr 200mg Capsule (Bristol-Myers Squibb Pharmaceuticals Ltd) Ketoprofen  
 33180 200mg Modified-release capsule Oral  
 Flamatak MR 100mg tablets (Actavis UK Ltd) Diclofenac sodium 100mg Modified-  
 20384 release tablet Oral  
 Diclofenac sodium 50mg gastro-resistant tablets (Sterwin Medicines) Diclofenac  
 31950 sodium 50mg Gastro-resistant tablet Oral  
 54783 Naproxen 250mg tablets (Teva UK Ltd) Naproxen 250mg Tablet Oral  
 Feldene 20mg Orodispersible tablet (Pfizer Ltd) Piroxicam 20mg Orodispersible  
 3409 tablet Oral  
 Oruvail 200 modified-release capsules (Waymade Healthcare Plc) Ketoprofen 200mg  
 71104 Modified-release capsule Oral  
 Naproxen and misoprostol 500mgwith200microgram combined Tablet  
 15180 Naproxen/Misoprostol 500mg+200mcg Tablet Oral  
 Nurofen Back Pain SR 300mg capsules (Reckitt Benckiser Healthcare (UK) Ltd)  
 28479 Ibuprofen 300mg Modified-release capsule Oral  
 Econac SR 75mg tablets (Advanz Pharma) Diclofenac sodium 75mg Modified-release  
 31787 tablet Oral  
 55486 Naproxen 500mg tablets (Teva UK Ltd) Naproxen 500mg Tablet Oral  
 Voltarol 50mg Tablet (Novartis Pharmaceuticals UK Ltd) Diclofenac sodium 50mg  
 1446 Gastro-resistant tablet Oral  
 Nurofen 200mg Soluble tablet (Crookes Healthcare Ltd) Ibuprofen 200mg Soluble  
 3597 Tablet Oral  
 Oruvail 200 modified-release capsules (Sanofi) Ketoprofen 200mg Modified-release  
 40185 capsule Oral  
 Diclofenac sodium 25mg gastro-resistant tablets (Medreich Plc) Diclofenac sodium  
 79731 25mg Gastro-resistant tablet Oral  
 Lemsip flu 12 hr Modified-release capsule (Reckitt Benckiser Healthcare (UK) Ltd)  
 Pseudoephedrine hydrochloride/Ibuprofen 45mg + 300mg Modified-release capsule  
 22283 Oral  
 Ibuprofen 300mg modified-release capsules Ibuprofen 300mg Modified-release  
 784 capsule Oral  
 Galpharm Ibuprofen For Children 100mg/5ml oral suspension 5ml sachets (Galpharm  
 71374 International Ltd) Ibuprofen 20mg/1ml Oral suspension Oral  
 66486 Arcoxia 90mg tablets (DE Pharmaceuticals) Etoricoxib 90mg Tablet Oral  
 Defanac Retard 100mg tablets (Ranbaxy (UK) Ltd) Diclofenac sodium 100mg  
 14707 Modified-release tablet Oral  
  
 Nurofen for Children Singles 100mg/5ml oral suspension 5ml sachets orange (Reckitt  
 51769 Benckiser Healthcare (UK) Ltd) Ibuprofen 20mg/1ml Oral suspension Oral  
 Ibuprofen and codeine 200mg+12.8mg Tablet (Almus Pharmaceuticals Ltd)  
 53617 Ibuprofen/Codeine phosphate 200mg + 12.8mg Tablet Oral  
  
 53803 Ibuprofen 200mg capsules (Kent Pharmaceuticals Ltd) Ibuprofen 200mg Capsule Oral  
 31064 Mobiflex 20mg Granules (Roche Products Ltd) Tenoxicam 20mg Granules Oral



Ibuprofen 200mg capsules (Colorama Pharmaceuticals Ltd) Ibuprofen 200mg Capsule  
62238 Oral  
Indometacin 50mg capsules (A A H Pharmaceuticals Ltd) Indometacin 50mg Capsule  
31959 Oral  
597 Diclofenac potassium 50mg tablets Diclofenac potassium 50mg Tablet Oral  
Nurofen Extra Strength 400mg capsules (Reckitt Benckiser Healthcare (UK) Ltd)  
29068 Ibuprofen 400mg Capsule Oral  
Voltarol Joint Pain 12.5mg tablets (Novartis Consumer Health UK Ltd) Diclofenac  
44112 potassium 12.5mg Tablet Oral  
11999 Orudis 100mg Capsule (Hawgreen Ltd) Ketoprofen 100mg Capsule Oral  
5812 Etoricoxib 90mg tablets Etoricoxib 90mg Tablet Oral  
5938 Etoricoxib 120mg tablets Etoricoxib 120mg Tablet Oral

73961 Naproxen 250mg tablets (Sigma Pharmaceuticals Plc) Naproxen 250mg Tablet Oral  
Naproxen 500mg gastro-resistant tablets (Phoenix Healthcare Distribution Ltd)  
55894 Naproxen 500mg Gastro-resistant tablet Oral  
67768 Naproxen 250mg tablets (Mylan) Naproxen 250mg Tablet Oral  
52141 Mobilan 25mg Capsule (Galen Ltd) Indometacin 25mg Capsule Oral  
650 Etoricoxib 60mg tablets Etoricoxib 60mg Tablet Oral

50117 Brufen 100mg/5ml syrup (Lexon (UK) Ltd) Ibuprofen 20mg/1ml Oral suspension Oral  
76955 Naproxen 75mg/5ml oral suspension Naproxen 15mg/1ml Oral suspension Oral  
Voltarol Rapid 25mg tablets (Novartis Pharmaceuticals UK Ltd) Diclofenac potassium  
5401 25mg Tablet Oral  
Diclofenac sodium 100mg modified-release tablets (A A H Pharmaceuticals Ltd)  
34271 Diclofenac sodium 100mg Modified-release tablet Oral  
Ibuprofen 100mg/5ml oral suspension sugar free (Pinewood Healthcare) Ibuprofen  
74216 20mg/1ml Oral suspension Oral  
Ponstan 50mg/5ml paediatric Liquid (Chemidex Pharma Ltd) Mefenamic acid  
14541 10mg/1ml Oral suspension Oral  
Diclofenac sodium 50mg gastro-resistant tablets (Sandoz Ltd) Diclofenac sodium  
29330 50mg Gastro-resistant tablet Oral  
48546 Ibuprofen 400mg caplets (Bristol Laboratories Ltd) Ibuprofen 400mg Tablet Oral

31777 Piroxicam 20mg dispersible tablets (Mylan) Piroxicam 20mg Dispersible tablet Oral

66648 Ibuprofen 400mg tablets (Almus Pharmaceuticals Ltd) Ibuprofen 400mg Tablet Oral  
5080 Celebrex 200mg capsules (Upjohn UK Ltd) Celecoxib 200mg Capsule Oral  
Diclovol Retard 100mg tablets (Arun Pharmaceuticals Ltd) Diclofenac sodium 100mg  
14085 Modified-release tablet Oral  
14776 Surgam 300mg tablets (Sanofi) Tiaprofenic acid 300mg Tablet Oral  
Diclofenac 75mg Modified-release tablet (Genus Pharmaceuticals Ltd) Diclofenac  
34212 sodium 75mg Modified-release tablet Oral  
Meflam 500mg Tablet (Trinity Pharmaceuticals Ltd) Mefenamic acid 500mg Tablet  
26522 Oral

56554 Naproxen 250mg/5ml oral suspension Naproxen 50mg/1ml Oral suspension Oral  
73629 Naproxen 500mg tablets (Mylan) Naproxen 500mg Tablet Oral  
27782 Ibuprofen 400mg tablets (Teva UK Ltd) Ibuprofen 400mg Tablet Oral  
2197 Naproxen 375mg Tablet Naproxen 375mg Tablet Oral

Nurofen Recovery 200mg orodispersible tablets (Reckitt Benckiser Healthcare (UK) Ltd) Ibuprofen 200mg Orodispersible tablet Oral  
28168  
28900 Indometacin 25mg Capsule (Generics (UK) Ltd) Indometacin 25mg Capsule Oral  
Ibuprofen 100mg/5ml oral suspension sugar free (Alliance Healthcare (Distribution) Ltd) Ibuprofen 20mg/1ml Oral suspension Oral  
53331  
Voltarol 75mg SR tablets (Lexon (UK) Ltd) Diclofenac sodium 75mg Modified-release  
50317 tablet Oral  
Feldene Melt 20mg tablets (Waymade Healthcare Plc) Piroxicam 20mg  
67815 Orodispersible tablet Oral

48161 Naproxen 500mg Tablet (Almus Pharmaceuticals Ltd) Naproxen 500mg Tablet Oral  
34447 Ibuprofen 200mg tablets (Thornton & Ross Ltd) Ibuprofen 200mg Tablet Oral  
Voltarol 50mg dispersible tablets (Waymade Healthcare Plc) Diclofenac sodium  
57045 50mg Dispersible tablet Oral  
Naprosyn EC 500mg tablets (Atrahs Pharma UK Ltd) Naproxen 500mg Gastro-  
3901 resistant tablet Oral  
1739 Brufen 400mg tablets (Mylan) Ibuprofen 400mg Tablet Oral  
66247 Ibuprofen 100mg chewable capsules Ibuprofen 100mg Chewable capsule Oral  
177 Indometacin 25mg capsules Indometacin 25mg Capsule Oral  
1231 Ketoprofen 100mg capsules Ketoprofen 100mg Capsule Oral  
Ponstan Forte 500mg tablets (Chemidex Pharma Ltd) Mefenamic acid 500mg Tablet  
296 Oral

39019 Brufen Retard 800mg tablets (Mylan) Ibuprofen 800mg Modified-release tablet Oral  
Diclofenac sodium 25mg gastro-resistant tablets (IVAX Pharmaceuticals UK Ltd)  
33994 Diclofenac sodium 25mg Gastro-resistant tablet Oral  
Mefenamic acid 500mg Tablet (Berk Pharmaceuticals Ltd) Mefenamic acid 500mg  
34910 Tablet Oral  
Rhumalgan SR 75mg capsules (Sandoz Ltd) Diclofenac sodium 75mg Modified-release  
17030 capsule Oral  
Indometacin 25mg capsules (Genesis Pharmaceuticals Ltd) Indometacin 25mg  
51339 Capsule Oral  
Rhumalgan CR 75 tablets (Sandoz Ltd) Diclofenac sodium 75mg Modified-release  
17029 tablet Oral

65514 Ibuprofen 200mg tablets (Boston Healthcare Ltd) Ibuprofen 200mg Tablet Oral  
66571 Celecoxib 200mg capsules (Actavis UK Ltd) Celecoxib 200mg Capsule Oral  
Nabumetone 500mg tablets (A A H Pharmaceuticals Ltd) Nabumetone 500mg Tablet  
42821 Oral  
Mefenamic acid 250mg Dispersible tablet Mefenamic Acid 250mg Dispersible Tablet  
1983 Oral  
Nurofen Express 256mg tablets (Reckitt Benckiser Healthcare (UK) Ltd) Ibuprofen  
42397 sodium dihydrate 200mg Tablet Oral  
Ponstan 250mg Dispersible tablet (Chemidex Pharma Ltd) Mefenamic Acid 250mg  
1246 Dispersible Tablet Oral  
586 Ibuprofen 200mg Capsule Ibuprofen 200mg Capsule Oral  
Axorid 100mg/20mg modified-release capsules (Meda Pharmaceuticals Ltd)  
41366 Ketoprofen/Omeprazole 100mg + 20mg Modified-release capsule Oral  
Diclomax Retard 100mg capsules (DE Pharmaceuticals) Diclofenac sodium 100mg  
74835 Modified-release capsule Oral

3817 Synflex 275mg tablets (Roche Products Ltd) Naproxen sodium 275mg Tablet Oral  
 Rheumatac Retard 75 tablets (Advanz Pharma) Diclofenac sodium 75mg Modified-  
 26351 release tablet Oral

62643 Indometacin 50mg Capsule (Carter Wallace Ltd) Indometacin 50mg Capsule Oral

50266 Ibuprofen 200mg caplets (The Boots Company Plc) Ibuprofen 200mg Tablet Oral

77335 Nurofen 400mg Granules (Crookes Healthcare Ltd) Ibuprofen 400mg Granules

14422 Fenbufen 450mg Effervescent tablet Fenbufen 450mg Effervescent Tablet Oral  
 Ibuprofen 400mg tablets (Alliance Healthcare (Distribution) Ltd) Ibuprofen 400mg  
 57112 Tablet Oral

Motifene 75mg modified-release capsules (Daiichi Sankyo UK Ltd) Diclofenac sodium  
 8062 75mg Modified-release capsule Oral  
 Diclofenac sodium 75mg modified-release capsules (A A H Pharmaceuticals Ltd)

32854 Diclofenac sodium 75mg Modified-release capsule Oral

51874 Arcoxia 30mg tablets (Lexon (UK) Ltd) Etoricoxib 30mg Tablet Oral  
 Diclofenac potassium 25mg tablets (Accord Healthcare Ltd) Diclofenac potassium  
 48871 25mg Tablet Oral  
 Naproxen 500mg gastro-resistant tablets (DE Pharmaceuticals) Naproxen 500mg  
 76404 Gastro-resistant tablet Oral

3897 Sulindac 100mg tablets Sulindac 100mg Tablet Oral

26242 Timpron 250mg Tablet (Berk Pharmaceuticals Ltd) Naproxen 250mg Tablet Oral  
 Ibuprofen 100mg/5ml oral suspension sugar free (Vantage) Ibuprofen 20mg/1ml  
 29352 Oral suspension Oral

52154 Ibuprofen 200mg tablets (Galpharm International Ltd) Ibuprofen 200mg Tablet Oral

64759 Diclofenac 50mg/5ml oral solution Diclofenac sodium 10mg/1ml Oral solution Oral  
 Mefenamic acid 250mg/5ml oral suspension Mefenamic acid 50mg/1ml Oral  
 75154 suspension Oral

10209 Ibufem 200mg tablets (Galpharm International Ltd) Ibuprofen 200mg Tablet Oral

55233 Ibuprofen 400mg Tablet (Nuicare Plc) Ibuprofen 400mg Tablet Oral  
 Naproxen 50mg/ml oral suspension (Thornton & Ross Ltd) Naproxen 50mg/1ml Oral  
 69645 suspension Oral

60035 Ibuprofen 200mg tablets film coated (Actavis UK Ltd) Ibuprofen 200mg Tablet Oral

4469 Fenopropfen 300mg tablets Fenopropfen calcium 300mg Tablet Oral  
 Pseudoephedrine 30mg with ibuprofen 200mg tablet Ibuprofen/Pseudoephedrine  
 28519 Hydrochloride 30mg + 200mg Tablets Oral  
 Naproxen 500mg / Esomeprazole 20mg modified-release tablets  
 Naproxen/Esomeprazole magnesium trihydrate 500mg + 20mg Modified-release  
 44800 tablet Oral  
 Indomax 75 SR capsules (Ashbourne Pharmaceuticals Ltd) Indometacin 75mg  
 17680 Modified-release capsule Oral

Nurofen for Children Singles 100mg/5ml oral suspension 5ml sachets strawberry

50363 (Reckitt Benckiser Healthcare (UK) Ltd) Ibuprofen 20mg/1ml Oral suspension Oral  
 Naprosyn EC 375mg tablets (Atnahs Pharma UK Ltd) Naproxen 375mg Gastro-  
 4045 resistant tablet Oral

Diclofenac sodium 50mg gastro-resistant tablets (Crescent Pharma Ltd) Diclofenac  
79845 sodium 50mg Gastro-resistant tablet Oral  
Opustan 500mg Tablet (Opus Pharmaceuticals Ltd) Mefenamic acid 500mg Tablet  
26247 Oral  
Meflam 250mg Capsule (Trinity Pharmaceuticals Ltd) Mefenamic acid 250mg Capsule  
22230 Oral

33785 Galprofen 200mg tablets (Galpharm International Ltd) Ibuprofen 200mg Tablet Oral  
32875 Ibuprofen 400mg tablets (Sandoz Ltd) Ibuprofen 400mg Tablet Oral  
Diclofenac 50mg Tablet (Regent Laboratories Ltd) Diclofenac sodium 50mg Gastro-  
30942 resistant tablet Oral  
50059 Celebrex 100mg capsules (Necessity Supplies Ltd) Celecoxib 100mg Capsule Oral  
Tiloket CR 100mg capsules (Tillomed Laboratories Ltd) Ketoprofen 100mg Modified-  
31916 release capsule Oral  
Diclofenac 50mg/5ml oral suspension Diclofenac sodium 10mg/1ml Oral suspension  
54906 Oral  
Ibuprofen 400mg tablets sugar coated (Kent Pharmaceuticals Ltd) Ibuprofen 400mg  
56213 Tablet Oral

79577 Naproxen 250mg tablets (Genesis Pharmaceuticals Ltd) Naproxen 250mg Tablet Oral  
48644 Ibuprofen 400mg caplets (Lloyds Pharmacy Ltd) Ibuprofen 400mg Tablet Oral  
6249 Froben 100mg tablets (Abbott Laboratories Ltd) Flurbiprofen 100mg Tablet Oral  
Naproxen 250mg gastro-resistant tablets (Kent Pharmaceuticals Ltd) Naproxen  
55505 250mg Gastro-resistant tablet Oral  
8401 Motrin 400mg tablets (Pfizer Ltd) Ibuprofen 400mg Tablet Oral  
Piroxicam 10mg capsules (IVAX Pharmaceuticals UK Ltd) Piroxicam 10mg Capsule  
41624 Oral  
Diclofenac sodium 100mg modified-release capsules Diclofenac sodium 100mg  
1115 Modified-release capsule Oral  
Diclofenac sodium 75mg modified-release capsules (Phoenix Healthcare Distribution  
61596 Ltd) Diclofenac sodium 75mg Modified-release capsule Oral  
Arthrosin EC 500 tablets (Ashbourne Pharmaceuticals Ltd) Naproxen 500mg Gastro-  
25342 resistant tablet Oral  
Diclomax Retard 100mg capsules (Mawdsley-Brooks & Company Ltd) Diclofenac  
74048 sodium 100mg Modified-release capsule Oral  
Fenoket 200mg modified-release capsules (Opus Pharmaceuticals Ltd) Ketoprofen  
18647 200mg Modified-release capsule Oral  
Indometacin 75mg Modified-release capsule (Actavis UK Ltd) Indometacin 75mg  
32097 Modified-release capsule Oral  
Naproxen 250mg gastro-resistant tablets (Mylan) Naproxen 250mg Gastro-resistant  
34289 tablet Oral  
Brufen retard tabs 800mg Modified-release tablet (Abbott Laboratories Ltd)  
2129 Ibuprofen 800mg Modified-release tablet Oral  
28348 Ibuprofen 200mg tablets (Teva UK Ltd) Ibuprofen 200mg Tablet Oral  
Calprofen 100mg/5ml oral suspension (McNeil Products Ltd) Ibuprofen 20mg/1ml  
49432 Oral suspension Oral  
76284 Ibular 200mg tablets (Ennogen Pharma Ltd) Ibuprofen 200mg Tablet Oral  
9474 Preservex 100mg tablets (Almirall Ltd) Aceclofenac 100mg Tablet Oral  
Diclofenac potassium 50mg tablets (DE Pharmaceuticals) Diclofenac potassium 50mg  
65783 Tablet Oral

65591 Ibuprofen 200mg tablets (Crescent Pharma Ltd) Ibuprofen 200mg Tablet Oral  
Ibuprofen 100mg/5ml oral suspension sugar free (Thornton & Ross Ltd) Ibuprofen  
32862 20mg/1ml Oral suspension Oral  
17201 Motrin 600mg tablets (Pfizer Ltd) Ibuprofen 600mg Tablet Oral  
4298 Nurofen 200mg Tablet (Crookes Healthcare Ltd) Ibuprofen 200mg Tablet Oral  
72293 Celecoxib 200mg capsules (Mylan) Celecoxib 200mg Capsule Oral  
Arthrosin EC 250 tablets (Ashbourne Pharmaceuticals Ltd) Naproxen 250mg Gastro-  
25341 resistant tablet Oral  
Valket 200 Retard capsules (Tillomed Laboratories Ltd) Ketoprofen 200mg Modified-  
57943 release capsule Oral  
Diclofenac sodium 100mg modified-release capsules (Sigma Pharmaceuticals Plc)  
78675 Diclofenac sodium 100mg Modified-release capsule Oral  
Diclofenac sodium 75mg modified-release capsules (Sigma Pharmaceuticals Plc)  
66577 Diclofenac sodium 75mg Modified-release capsule Oral

34911 Ibuprofen 200mg Tablet (Celltech Pharma Europe Ltd) Ibuprofen 200mg Tablet Oral  
Indolar SR 75mg capsules (Sandoz Ltd) Indometacin 75mg Modified-release capsule  
14476 Oral

38770 Lodine SR 600mg tablets (Almirall Ltd) Etodolac 600mg Modified-release tablet Oral  
1470 Mobic 15mg tablets (Boehringer Ingelheim Ltd) Meloxicam 15mg Tablet Oral  
Ibuprofen 600mg effervescent granules sachets Ibuprofen 600mg Effervescent  
3599 granules Oral

76610 Indometacin 25mg/5ml oral suspension Indometacin 5mg/1ml Oral suspension Oral  
61953 Ibuprofen 200mg caplets (Wockhardt UK Ltd) Ibuprofen 200mg Tablet Oral  
2288 Naprosyn 250mg tablets (Atnahs Pharma UK Ltd) Naproxen 250mg Tablet Oral

51808 Diclofenac 12.5mg/5ml oral solution Diclofenac sodium 2.5mg/1ml Oral solution Oral  
3266 Flurbiprofen 50mg tablets Flurbiprofen 50mg Tablet Oral  
75549 Etoricoxib 30mg tablets (Accord Healthcare Ltd) Etoricoxib 30mg Tablet Oral  
11907 Dexibuprofen 400mg tablets Dexibuprofen 400mg Tablet Oral  
Ibuprofen 200mg/5ml oral suspension sugar free Ibuprofen 40mg/1ml Oral  
75893 suspension Oral  
37562 Arcoxia 30mg tablets (Merck Sharp & Dohme Ltd) Etoricoxib 30mg Tablet Oral  
Diclofenac 50mg Gastro-resistant tablet (Pharmacia Ltd) Diclofenac sodium 50mg  
30297 Gastro-resistant tablet Oral  
34354 Ibuprofen 200mg tablets (Vantage) Ibuprofen 200mg Tablet Oral  
Galprofen 100mg/5ml oral suspension (Galpharm International Ltd) Ibuprofen  
30724 20mg/1ml Oral suspension Oral  
Ibuprofen 200mg capsules (AM Distributions (Yorkshire) Ltd) Ibuprofen 200mg  
59067 Capsule Oral  
Naproxen 250mg gastro-resistant tablets (Genesis Pharmaceuticals Ltd) Naproxen  
65348 250mg Gastro-resistant tablet Oral  
2258 Emflex 60mg capsules (Merck Serono Ltd) Acemetacin 60mg Capsule Oral  
38817 Diclofenac potassium 12.5mg tablets Diclofenac potassium 12.5mg Tablet Oral  
Meloxicam 7.5mg orodispersible tablets sugar free Meloxicam 7.5mg Orodispersible  
57475 tablet Oral  
Naproxen 500mg gastro-resistant tablets (Genesis Pharmaceuticals Ltd) Naproxen  
54476 500mg Gastro-resistant tablet Oral

Diclofenac sodium 25mg gastro-resistant tablets (Actavis UK Ltd) Diclofenac sodium  
 24121 25mg Gastro-resistant tablet Oral  
 Diclofenac sodium 50mg gastro-resistant tablets (IVAX Pharmaceuticals UK Ltd)  
 34487 Diclofenac sodium 50mg Gastro-resistant tablet Oral  
 Adcortyl with graneodin Cream (E R Squibb and Sons Ltd) Neomycin  
 1608 Sulphate/Gramicidin/Triamcinolone Acetonide Cream Topical  
 Nurofen for Children Cold, Pain and Fever Strawberry Flavour 100mg/5ml oral  
 suspension (Reckitt Benckiser Healthcare (UK) Ltd) Ibuprofen 20mg/1ml Oral  
 59502 suspension Oral  
  
 71314 Ibuprofen 200mg tablets (Kent Pharmaceuticals Ltd) Ibuprofen 200mg Tablet Oral  
  
 58652 Ibuprofen 600mg tablets (Sigma Pharmaceuticals Plc) Ibuprofen 600mg Tablet Oral  
 25619 Nurofen 400mg Tablet (Crookes Healthcare Ltd) Ibuprofen 400mg Tablet Oral  
 Voltarol Rapid 50mg tablets (Waymade Healthcare Plc) Diclofenac potassium 50mg  
 58071 Tablet Oral  
 Etodolac sr 600mg Tablet (Winthrop Pharmaceuticals Ltd) Etodolac 600mg Modified-  
 76419 release tablet Oral  
 Rhumalgan XL 100mg capsules (Almus Pharmaceuticals Ltd) Diclofenac sodium  
 56078 100mg Modified-release capsule Oral  
 Diflunisal 250mg Tablet (Approved Prescription Services Ltd) Diflunisal 250mg Tablet  
 75120 Oral  
 Flamrase 50 EC tablets (Teva UK Ltd) Diclofenac sodium 50mg Gastro-resistant tablet  
 21824 Oral  
 66364 Meloxicam 15mg tablets (Actavis UK Ltd) Meloxicam 15mg Tablet Oral  
 Ibuprofen 100mg/5ml oral suspension 5ml sachets sugar free (Thornton & Ross Ltd)  
 25205 Ibuprofen 20mg/1ml Oral suspension Oral  
 21813 Lidifen 400mg Tablet (Berk Pharmaceuticals Ltd) Ibuprofen 400mg Tablet Oral  
 Ketozip 200 XL capsules (Ashbourne Pharmaceuticals Ltd) Ketoprofen 200mg  
 21955 Modified-release capsule Oral  
 Nurofen for children baby 100mg/5ml Oral suspension (Reckitt Benckiser Healthcare  
 44233 (UK) Ltd) Ibuprofen 100mg/5ml Oral Suspension Oral  
 Nurofen 200mg liquid capsules (Reckitt Benckiser Healthcare (UK) Ltd) Ibuprofen  
 35292 200mg Capsule Oral  
 Diclofenac sodium 50mg gastro-resistant tablets (Teva UK Ltd) Diclofenac sodium  
 28553 50mg Gastro-resistant tablet Oral  
 Nurofen Advance 200mg tablets (Crookes Healthcare Ltd) Ibuprofen lysine 200mg  
 24887 Tablet Oral  
 Etolyn 600mg modified-release tablets (Mylan) Etodolac 600mg Modified-release  
 71908 tablet Oral  
 Dicloflex Retard 100mg tablets (Teva UK Ltd) Diclofenac sodium 100mg Modified-  
 42455 release tablet Oral  
 Diclofenac sodium 50mg gastro-resistant tablets (Medreich Plc) Diclofenac sodium  
 72396 50mg Gastro-resistant tablet Oral  
 71152 Mobiflex 20mg tablets (Dowelhurst Ltd) Tenoxicam 20mg Tablet Oral  
 Voltarol Rapid 25mg tablets (DE Pharmaceuticals) Diclofenac potassium 25mg Tablet  
 51343 Oral  
 Ibuprofen 100mg/5ml oral suspension sugar free (Sandoz Ltd) Ibuprofen 20mg/1ml  
 29332 Oral suspension Oral  
 71041 Ibuprofen 600mg tablets (Bristol Laboratories Ltd) Ibuprofen 600mg Tablet Oral

Fenactol 50mg gastro-resistant tablets (Dexcel-Pharma Ltd) Diclofenac sodium 50mg  
17128 Gastro-resistant tablet Oral  
11980 Cuprofen 400mg Tablet (SSL International Plc) Ibuprofen 400mg Tablet Oral

45213 Diclofenac 10mg dispersible tablets Diclofenac sodium 10mg Dispersible tablet Oral  
Diclofenac sodium 75mg modified-release tablets Diclofenac sodium 75mg Modified-  
580 release tablet Oral  
Ibuprofen 200mg capsules (Bell,Sons & Co (Druggists) Ltd) Ibuprofen 200mg Capsule  
70299 Oral

45262 Naproxen Oral solution Naproxen Oral Solution Oral  
Proflex 200mg Tablet (Novartis Consumer Health UK Ltd) Ibuprofen 200mg Tablet  
19575 Oral  
Artracin sr 75mg Modified-release capsule (Trinity Pharmaceuticals Ltd) Indometacin  
23026 75mg Modified-release capsule Oral

55434 Ibuprofen 400mg tablets (Bristol Laboratories Ltd) Ibuprofen 400mg Tablet Oral  
62843 Arcoxia 90mg tablets (Lexon (UK) Ltd) Etoricoxib 90mg Tablet Oral  
Valenac ec 25mg Gastro-resistant tablet (Shire Pharmaceuticals Ltd) Diclofenac  
28390 sodium 25mg Gastro-resistant tablet Oral  
Diclofenac sodium 25mg gastro-resistant tablets (Teva UK Ltd) Diclofenac sodium  
32108 25mg Gastro-resistant tablet Oral

65471 Ibuprofen 200mg tablets (Almus Pharmaceuticals Ltd) Ibuprofen 200mg Tablet Oral

55454 Naproxen 500mg tablets (Kent Pharmaceuticals Ltd) Naproxen 500mg Tablet Oral  
10481 Lederfen f 450mg Tablet (Wyeth Pharmaceuticals) Fenbufen 450mg Tablet Oral

72030 Naproxen 500mg tablets (Sigma Pharmaceuticals Plc) Naproxen 500mg Tablet Oral  
Digenac xl 100mg Modified-release tablet (Genus Pharmaceuticals Ltd) Diclofenac  
18371 sodium 100mg Modified-release tablet Oral

34621 Ibuprofen 200mg Tablet (Nucare Plc) Ibuprofen 200mg Tablet Oral  
Voltarol 50mg dispersible tablets (Lexon (UK) Ltd) Diclofenac sodium 50mg  
49059 Dispersible tablet Oral

21050 Ketonal 100mg Capsule (Lagap) Ketoprofen 100mg Capsule Oral  
Diclofenac 75mg Modified-release tablet (Galen Ltd) Diclofenac sodium 75mg  
30282 Modified-release tablet Oral

53604 Ibuprofen 200mg capsules (Numark Ltd) Ibuprofen 200mg Capsule Oral  
Diclovol Retard 100mg tablets (Mylan) Diclofenac sodium 100mg Modified-release  
27200 tablet Oral

2243 Meloxicam 7.5mg tablets Meloxicam 7.5mg Tablet Oral

47816 Tenoxicam 20mg Tablet (Sovereign Medical Ltd) Tenoxicam 20mg Tablet Oral  
1043 Naproxen sodium 275mg tablets Naproxen sodium 275mg Tablet Oral

19322 Disalcid 500mg Capsule (3M Health Care Ltd) Salsalate 500mg Capsule Oral  
Defanac 25mg gastro-resistant tablets (Ranbaxy (UK) Ltd) Diclofenac sodium 25mg  
25362 Gastro-resistant tablet Oral  
Naproxen 500mg tablets (Alliance Healthcare (Distribution) Ltd) Naproxen 500mg  
61695 Tablet Oral

77228 Ibuprofen 200mg Tablet (LPC Medical (UK) Ltd) Ibuprofen 200mg Tablet Oral  
49277 Ibuprofen 200mg caplets (Bristol Laboratories Ltd) Ibuprofen 200mg Tablet Oral  
Indometacin 75mg modified-release capsules Indometacin 75mg Modified-release  
1210 capsule Oral

Manorfen 400mg tablets (The Manor Drug Company (Nottingham) Ltd) Ibuprofen  
 36606 400mg Tablet Oral  
 Ketoprofen 100mg modified-release capsules (A A H Pharmaceuticals Ltd)  
 75573 Ketoprofen 100mg Modified-release capsule Oral  
 Indometacin sr 75mg Modified-release capsule (Generics (UK) Ltd) Indometacin  
 41823 75mg Modified-release capsule Oral  
 Diclofenac sodium 25mg gastro-resistant tablets Diclofenac Sodium 25mg EC Tablets  
 1096 Oral  
 Naproxen 50mg/ml oral suspension (Alliance Healthcare (Distribution) Ltd) Naproxen  
 69828 50mg/1ml Oral suspension Oral  
 Oruvail 200mg Modified-release capsule (Hawgreen Ltd) Ketoprofen 200mg  
 838 Modified-release capsule Oral  
 62658 Arcoxia 120mg tablets (Waymade Healthcare Plc) Etoricoxib 120mg Tablet Oral  
 Diclofenac sodium 50mg gastro-resistant tablets Diclofenac Sodium 50mg EC Tablets  
 1075 Oral  
 Lofensaid Retard 100 tablets (Opus Pharmaceuticals Ltd) Diclofenac sodium 100mg  
 16272 Modified-release tablet Oral  
 33589 Ibuprofen 400mg tablets (Thornton & Ross Ltd) Ibuprofen 400mg Tablet Oral  
 Ketoprofen sr 200mg Capsule (Approved Prescription Services Ltd) Ketoprofen  
 46919 200mg Modified-release capsule Oral  
 79167 Ibuprofen 400mg Tablet (Teva UK Ltd) Ibuprofen 400mg Tablet Oral

Arthrotec 75 gastro-resistant tablets (Mawdsley-Brooks & Company Ltd) Diclofenac  
 50269 sodium/Misoprostol 75mg + 200microgram Gastro-resistant tablet Oral  
 Advil cold and sinus 200mg+30mg Tablet (Wyeth Consumer Healthcare)  
 32704 Ibuprofen/Pseudoephedrine hydrochloride 200mg + 30mg Tablet Oral  
 Ibuprofen sodium dihydrate 200mg tablets Ibuprofen sodium dihydrate 200mg  
 39502 Tablet Oral  
 Arthrotec 50 gastro-resistant tablets (Lexon (UK) Ltd) Diclofenac sodium/Misoprostol  
 70438 50mg + 200microgram Gastro-resistant tablet Oral  
 Diclofenac 50mg Gastro-resistant tablet (Almus Pharmaceuticals Ltd) Diclofenac  
 42406 sodium 50mg Gastro-resistant tablet Oral  
 Rhumalgan 25mg Tablet (Lagap) Diclofenac sodium 25mg Gastro-resistant tablet  
 25790 Oral  
 Ibuprofen Twelve Plus Pain Relief 200mg/5ml oral suspension (Aspire Pharma Ltd)  
 76234 Ibuprofen 40mg/1ml Oral suspension Oral  
 Naproxen 25mg/ml oral suspension sugar free (Orion Pharma (UK) Ltd) Naproxen  
 68470 25mg/1ml Oral suspension Oral  
 33111 Prosaid 250mg Tablet (BHR Pharmaceuticals Ltd) Naproxen 250mg Tablet Oral  
 16194 Lodine 200mg Tablet (Shire Pharmaceuticals Ltd) Etodolac 200mg Tablet Oral

2938 Ibuprofen 100mg/5ml Oral suspension Ibuprofen 100mg/5ml Oral Suspension Oral  
 Anadin ultra double strength 400mg Capsule (Wyeth Consumer Healthcare)  
 37253 Ibuprofen 400mg Capsule Oral

56106 Naproxen 500mg/5ml oral suspension Naproxen 100mg/1ml Oral suspension Oral  
 Boots Ibuprofen and Codeine 200mg/12.8mg tablets (The Boots Company Plc)  
 69285 Ibuprofen/Codeine phosphate 200mg + 12.8mg Tablet Oral  
 1778 Surgam 300mg Tablet (Sanofi) Tiaprofenic acid 300mg Tablet Oral



Naproxen 250mg gastro-resistant tablets (Accord Healthcare Ltd) Naproxen 250mg  
 58221 Gastro-resistant tablet Oral

24212 Imbrilon 50mg Capsule (Berk Pharmaceuticals Ltd) Indometacin 50mg Capsule Oral  
 29587 Ebufac 400mg Tablet (DDSA Pharmaceuticals Ltd) Ibuprofen 400mg Tablet Oral

64245 Celecoxib 200mg capsules (A A H Pharmaceuticals Ltd) Celecoxib 200mg Capsule Oral  
 68582 Ibuprofen 200mg tablets (DE Pharmaceuticals) Ibuprofen 200mg Tablet Oral  
 Diclofenac sodium 75mg modified-release tablets Diclofenac Sodium 75mg Modified  
 1233 Release Tablet Oral

19046 Ibuprofen 400mg tablets (A A H Pharmaceuticals Ltd) Ibuprofen 400mg Tablet Oral  
 Econac XL 100mg tablets (Advanz Pharma) Diclofenac sodium 100mg Modified-  
 36486 release tablet Oral

48084 Ibuprofen 200mg/5ml oral suspension Ibuprofen 40mg/1ml Oral suspension Oral  
 Brufen Retard 800mg tablets (Lexon (UK) Ltd) Ibuprofen 800mg Modified-release  
 74313 tablet Oral  
 Nurofen for children 100mg/5ml Oral suspension (Reckitt Benckiser Healthcare (UK)  
 4731 Ltd) Ibuprofen 100mg/5ml Oral Suspension Oral

15068 Arthrofen 400 tablets (Ashbourne Pharmaceuticals Ltd) Ibuprofen 400mg Tablet Oral  
 Dicloflex 50mg gastro-resistant tablets (Dexcel-Pharma Ltd) Diclofenac sodium 50mg  
 4692 Gastro-resistant tablet Oral

46440 Naproxen 500mg Tablet (M & A Pharmachem Ltd) Naproxen 500mg Tablet Oral  
 Diclofenac sodium 100mg modified-release capsules (Actavis UK Ltd) Diclofenac  
 68354 sodium 100mg Modified-release capsule Oral  
 Voltarol Rapid 50mg tablets (Mawdsley-Brooks & Company Ltd) Diclofenac  
 51099 potassium 50mg Tablet Oral

21421 Seractil 400mg tablets (Thornton & Ross Ltd) Dexibuprofen 400mg Tablet Oral  
 Dicloflex 75mg SR tablets (Teva UK Ltd) Diclofenac sodium 75mg Modified-release  
 20805 tablet Oral  
 Diclofenac sodium 25mg gastro-resistant tablets (A A H Pharmaceuticals Ltd)

24128 Diclofenac sodium 25mg Gastro-resistant tablet Oral  
 141 Piroxicam 10mg capsules Piroxicam 10mg Capsule Oral  
 Fenbutip 450mg Tablet (Ashbourne Pharmaceuticals Ltd) Fenbuten 450mg Tablet  
 26214 Oral  
 Dicloflex retard tabs 100 100mg Modified-release tablet (Dexcel-Pharma Ltd)

8789 Diclofenac sodium 100mg Modified-release tablet Oral  
 Voltarol Retard 100mg tablets (Waymade Healthcare Plc) Diclofenac sodium 100mg  
 77405 Modified-release tablet Oral  
 Flamrase 25 EC tablets (Teva UK Ltd) Diclofenac sodium 25mg Gastro-resistant tablet  
 21807 Oral

45320 Ibuprofen 200mg tablets (Sandoz Ltd) Ibuprofen 200mg Tablet Oral  
 Diclomax SR 75mg capsules (DE Pharmaceuticals) Diclofenac sodium 75mg Modified-  
 71117 release capsule Oral  
 Diclofenac sodium 100mg modified-release capsules (A A H Pharmaceuticals Ltd)

72546 Diclofenac sodium 100mg Modified-release capsule Oral  
 26404 Tolmetin 200mg Capsule Tolmetin Sodium 200mg Capsule Oral  
 1621 Brufen 200mg tablets (Abbott Laboratories Ltd) Ibuprofen 200mg Tablet Oral

54514 Ibuprofen lysine 400mg oral powder sachets Ibuprofen lysine 400mg Powder Oral  
68932 Meloxicam 15mg tablets (Somex Pharma) Meloxicam 15mg Tablet Oral  
Mefenamic acid 250mg capsules (Advanz Pharma) Mefenamic acid 250mg Capsule  
79173 Oral  
Mefenamic acid 250mg Capsule (Actavis UK Ltd) Mefenamic acid 250mg Capsule  
4710 Oral  
4564 Fenopropfen 200mg Tablet Fenopropfen Calcium 200mg Tablet Oral  
Ibuprofen 100mg/5ml oral suspension sugar free (Phoenix Healthcare Distribution  
71072 Ltd) Ibuprofen 20mg/1ml Oral suspension Oral  
Volraman 25mg gastro-resistant tablets (LPC Medical (UK) Ltd) Diclofenac sodium  
21444 25mg Gastro-resistant tablet Oral  
Trilisate 500mg Tablet (Napp Pharmaceuticals Ltd) Magnesium Trisilicate 500mg  
12188 Tablet Oral  
Slofenac 100mg Modified-release tablet (Sterwin Medicines) Diclofenac sodium  
24236 100mg Modified-release tablet Oral

66757 Celebrex 200mg capsules (Waymade Healthcare Plc) Celecoxib 200mg Capsule Oral  
Diclofenac sodium 50mg gastro-resistant tablets (Sigma Pharmaceuticals Plc)  
71100 Diclofenac sodium 50mg Gastro-resistant tablet Oral  
Anadin LiquiFast 200mg effervescent tablets (Pfizer Consumer Healthcare Ltd)  
46860 Ibuprofen 200mg Effervescent tablet Oral  
64297 Nabumetone 500mg tablets (Mylan) Nabumetone 500mg Tablet Oral

19036 Arthrofen 200 tablets (Ashbourne Pharmaceuticals Ltd) Ibuprofen 200mg Tablet Oral  
Diclofenac sodium 75mg modified-release capsules (Actavis UK Ltd) Diclofenac  
60666 sodium 75mg Modified-release capsule Oral

19320 Piroflam 20mg Capsule (Opus Pharmaceuticals Ltd) Piroxicam 20mg Capsule Oral  
Progesic 200mg Tablet (Eli Lilly and Company Ltd) Fenopropfen Calcium 200mg Tablet  
17754 Oral  
Voltarol Rapid 50mg tablets (Sigma Pharmaceuticals Plc) Diclofenac potassium 50mg  
70468 Tablet Oral  
Celecoxib 200mg capsules (Sigma Pharmaceuticals Plc) Celecoxib 200mg Capsule  
64935 Oral  
Fenactol 25mg gastro-resistant tablets (Discovery Pharmaceuticals) Diclofenac  
18921 sodium 25mg Gastro-resistant tablet Oral  
Voltarol 25mg gastro-resistant tablets (Novartis Pharmaceuticals UK Ltd) Diclofenac  
497 sodium 25mg Gastro-resistant tablet Oral  
32366 Relcofen 200mg Tablet (Actavis UK Ltd) Ibuprofen 200mg Tablet Oral

21864 Pirozip 10 capsules (Ashbourne Pharmaceuticals Ltd) Piroxicam 10mg Capsule Oral  
Naproxen 500mg gastro-resistant tablets (Kent Pharmaceuticals Ltd) Naproxen  
52931 500mg Gastro-resistant tablet Oral  
Froben sr 200mg Modified-release capsule (Abbott Laboratories Ltd) Flurbiprofen  
4043 200mg Modified-release capsule Oral  
43616 Celecoxib 400mg capsules Celecoxib 400mg Capsule Oral  
Diclotard 75mg modified-release tablets (Galen Ltd) Diclofenac sodium 75mg  
9500 Modified-release tablet Oral

Difenor xl 100mg Modified-release tablet (IVAX Pharmaceuticals UK Ltd) Diclofenac  
26888 sodium 100mg Modified-release tablet Oral  
16192 Motrin 200mg Tablet (Pharmacia Ltd) Ibuprofen 200mg Tablet Oral  
Dysman 250 capsules (Ashbourne Pharmaceuticals Ltd) Mefenamic acid 250mg  
48810 Capsule Oral  
7522 Lederfen 300mg Tablet (Wyeth Pharmaceuticals) Fenbufen 300mg Tablet Oral  
Naproxen 375mg gastro-resistant tablets Naproxen 375mg Gastro-resistant tablet  
3432 Oral  
43911 Ibuprofen 600mg Tablet (C P Pharmaceuticals Ltd) Ibuprofen 600mg Tablet Oral

41621 Piroxicam 20mg capsules (A A H Pharmaceuticals Ltd) Piroxicam 20mg Capsule Oral  
30243 Ibuprofen 200mg effervescent tablets Ibuprofen 200mg Effervescent tablet Oral

33113 Artracin 50mg Capsule (DDSA Pharmaceuticals Ltd) Indometacin 50mg Capsule Oral  
Indometacin 25mg capsules (Almus Pharmaceuticals Ltd) Indometacin 25mg Capsule  
67756 Oral  
46968 Mefenamic acid 250mg capsules (Mylan) Mefenamic acid 250mg Capsule Oral  
Voltarol 50mg dispersible tablets (Mawdsley-Brooks & Company Ltd) Diclofenac  
53384 sodium 50mg Dispersible tablet Oral  
Naproxen 500mg gastro-resistant tablets (Mylan) Naproxen 500mg Gastro-resistant  
34610 tablet Oral  
Fenbuzip 300mg Tablet (Ashbourne Pharmaceuticals Ltd) Fenbufen 300mg Tablet  
26994 Oral  
Ibuprofen 100mg/5ml oral suspension sugar free (A A H Pharmaceuticals Ltd)  
33704 Ibuprofen 20mg/1ml Oral suspension Oral  
Defanac 50mg gastro-resistant tablets (Ranbaxy (UK) Ltd) Diclofenac sodium 50mg  
25358 Gastro-resistant tablet Oral  
402 Nurofen 200mg Tablet (Crookes Healthcare Ltd) Ibuprofen 200mg Tablet Oral

63357 Naproxen 250mg tablets (Almus Pharmaceuticals Ltd) Naproxen 250mg Tablet Oral  
Ibuprofen 100mg/5ml Oral suspension (Hillcross Pharmaceuticals Ltd) Ibuprofen  
29345 20mg/1ml Oral suspension Oral  
Fenpaed 100mg/5ml oral suspension (Pinewood Healthcare) Ibuprofen 20mg/1ml  
65121 Oral suspension Oral  
344 Acemetacin 60mg capsules Acemetacin 60mg Capsule Oral  
Indometacin 75mg modified-release capsules (Kent Pharmaceuticals Ltd)  
60916 Indometacin 75mg Modified-release capsule Oral  
Ibuprofen 100mg/5ml Oral suspension (Neo Laboratories Ltd) Ibuprofen 20mg/1ml  
34663 Oral suspension Oral  
Oruvail 100 modified-release capsules (Waymade Healthcare Plc) Ketoprofen 100mg  
71127 Modified-release capsule Oral  
30122 Lornoxicam 8mg tablets Lornoxicam 8mg Tablet Oral  
29010 Phenylbutazone 100mg tablets Phenylbutazone 100mg Tablet Oral  
Ketoprofen sr 100mg Capsule (Approved Prescription Services Ltd) Ketoprofen  
42500 100mg Modified-release capsule Oral  
Diclofenac sodium 75mg modified-release tablets (A A H Pharmaceuticals Ltd)  
31589 Diclofenac sodium 75mg Modified-release tablet Oral  
Naprosyn S/R 500mg tablets (Roche Products Ltd) Naproxen sodium 500mg Modified-  
8663 release tablet Oral

Diclomax Retard 100mg capsules (Galen Ltd) Diclofenac sodium 100mg Modified-  
 38948 release capsule Oral  
 Mefenamic acid 500mg/5ml oral suspension Mefenamic acid 100mg/1ml Oral  
 76310 suspension Oral  
 Sudafed sinus pressure & pain Tablet (McNeil Products Ltd)  
 44892 Ibuprofen/Pseudoephedrine hydrochloride 200mg + 30mg Tablet Oral  
 Ibuprofen 200mg tablets (Bell,Sons & Co (Druggists) Ltd) Ibuprofen 200mg Tablet  
 77525 Oral  
 Voltarol Pain-eze 12.5mg tablets (Novartis Consumer Health UK Ltd) Diclofenac  
 39722 potassium 12.5mg Tablet Oral  
 Dicloflex Retard 100mg tablets (Almus Pharmaceuticals Ltd) Diclofenac sodium  
 35893 100mg Modified-release tablet Oral  
 Piroxicam 20mg Capsule (Ashbourne Pharmaceuticals Ltd) Piroxicam 20mg Capsule  
 77185 Oral  
 Flamrase sr 75mg Modified-release tablet (APS Berk) Diclofenac sodium 75mg  
 11322 Modified-release tablet Oral

5407 Naproxen 125mg/5ml oral suspension Naproxen 25mg/1ml Oral suspension Oral  
 Ibuprofen 200mg capsules (Galpharm International Ltd) Ibuprofen 200mg Capsule  
 52009 Oral  
 20386 Ramodar 200mg Tablet (Wyeth Pharmaceuticals) Etodolac 200mg Tablet Oral  
 Nurofen Joint & Back Pain Relief 256mg tablets (Reckitt Benckiser Healthcare (UK)  
 69018 Ltd) Ibuprofen sodium dihydrate 200mg Tablet Oral  
 850 Mobic 7.5mg tablets (Boehringer Ingelheim Ltd) Meloxicam 7.5mg Tablet Oral  
 33318 Indometacin 50mg Capsule (Generics (UK) Ltd) Indometacin 50mg Capsule Oral  
 Indometacin sr 75mg Modified-release capsule (C P Pharmaceuticals Ltd)  
 41817 Indometacin 75mg Modified-release capsule Oral  
 Ibuprofen 800mg modified-release tablets Ibuprofen 800mg Modified-release tablet  
 1392 Oral  
 15 Ibuprofen 400mg tablets Ibuprofen 400mg Tablet Oral  
 25794 Isifen 400mg Tablet (Isis Products Ltd) Ibuprofen 400mg Tablet Oral  
 75771 Larafen 100mg Capsule (Sandoz Ltd) Ketoprofen 100mg Capsule Oral  
 Naproxen 500mg gastro-resistant tablets Naproxen 500mg Gastro-resistant tablet  
 3053 Oral  
 Diclofenac 50mg Tablet (Approved Prescription Services Ltd) Diclofenac sodium  
 54463 50mg Gastro-resistant tablet Oral  
 Acoflam 100mg Retard tablets (Mercury Pharma Group Ltd) Diclofenac sodium  
 55099 100mg Modified-release tablet Oral  
 Motifene 75mg modified-release capsules (Lexon (UK) Ltd) Diclofenac sodium 75mg  
 77392 Modified-release capsule Oral  
 Valdic 75 Retard tablets (Fannin UK Ltd) Diclofenac sodium 75mg Modified-release  
 30849 tablet Oral  
 2363 Dolobid 250mg tablets (Merck Sharp & Dohme Ltd) Diflunisal 250mg Tablet Oral  
 Brufen 100mg/5ml syrup (Sigma Pharmaceuticals Plc) Ibuprofen 20mg/1ml Oral  
 59203 suspension Oral

34550 Ibuprofen 400mg tablets film coated (Actavis UK Ltd) Ibuprofen 400mg Tablet Oral  
 34924 Mefenamic acid 250mg Capsule (Teva UK Ltd) Mefenamic acid 250mg Capsule Oral

Junior Ibuprofen 100mg/5ml oral suspension (Numark Ltd) Ibuprofen 20mg/1ml Oral  
50652 suspension Oral  
Oruvail 100 modified-release capsules (Mawdsley-Brooks & Company Ltd)  
71376 Ketoprofen 100mg Modified-release capsule Oral  
30168 Arthroxen 250mg Tablet (C P Pharmaceuticals Ltd) Naproxen 250mg Tablet Oral  
Boots Rapid Ibuprofen lysine 342mg tablets (The Boots Company Plc) Ibuprofen  
48568 lysine 200mg Tablet Oral  
Condrotec 500mg+200microgram Tablet (Pharmacia Ltd) Naproxen/Misoprostol  
17733 500mg+200microgram Tablet Oral  
Isclofen 50mg Gastro-resistant tablet (Isis Products Ltd) Diclofenac sodium 50mg  
33457 Gastro-resistant tablet Oral  
Anadin Ibuprofen 200mg tablets (Pfizer Consumer Healthcare Ltd) Ibuprofen 200mg  
32509 Tablet Oral  
51360 Naproxen 250mg tablets (Accord Healthcare Ltd) Naproxen 250mg Tablet Oral  
Diclofenac sodium 25mg gastro-resistant tablets (DE Pharmaceuticals) Diclofenac  
64303 sodium 25mg Gastro-resistant tablet Oral  
Ibuprofen 100mg/5ml oral suspension sugar free Ibuprofen 20mg/1ml Oral  
48326 suspension Oral  
341 Feldene 10mg capsules (Pfizer Ltd) Piroxicam 10mg Capsule Oral  
  
39693 Naproxen 200mg/5ml oral suspension Naproxen 40mg/1ml Oral suspension Oral  
  
63079 Ibuprofen 400mg tablets (Waymade Healthcare Plc) Ibuprofen 400mg Tablet Oral  
2235 Relifex 500mg tablets (Mylan) Nabumetone 500mg Tablet Oral  
Naproxen 500mg gastro-resistant tablets (Actavis UK Ltd) Naproxen 500mg Gastro-  
30982 resistant tablet Oral  
Indometacin 50mg Capsule (Approved Prescription Services Ltd) Indometacin 50mg  
41615 Capsule Oral  
Arcoxia 90mg tablets (Mawdsley-Brooks & Company Ltd) Etoricoxib 90mg Tablet  
64521 Oral  
  
44703 Piroxicam 10mg Capsule (Berk Pharmaceuticals Ltd) Piroxicam 10mg Capsule Oral  
Flurbiprofen 50mg Tablet (Bristol-Myers Squibb Pharmaceuticals Ltd) Flurbiprofen  
34725 50mg Tablet Oral  
Diclovol 50mg gastro-resistant tablets (Arun Pharmaceuticals Ltd) Diclofenac sodium  
15732 50mg Gastro-resistant tablet Oral  
Diclofenac sodium 50mg gastro-resistant tablets (Actavis UK Ltd) Diclofenac sodium  
24122 50mg Gastro-resistant tablet Oral  
  
24356 Ecoxolac 300mg capsules (Meda Pharmaceuticals Ltd) Etodolac 300mg Capsule Oral  
78629 Meloxicam 15mg tablets (Mylan) Meloxicam 15mg Tablet Oral  
Nurofen Express 200mg liquid capsules (Reckitt Benckiser Healthcare (UK) Ltd)  
37002 Ibuprofen 200mg Capsule Oral  
Naproxen 250mg gastro-resistant tablets (Sovereign Medical Ltd) Naproxen 250mg  
80088 Gastro-resistant tablet Oral  
Nurofen for Children Cold, Pain and Fever Orange Flavour 100mg/5ml oral  
suspension (Reckitt Benckiser Healthcare (UK) Ltd) Ibuprofen 20mg/1ml Oral  
60510 suspension Oral  
  
73743 Ibuprofen 400mg tablets (Sigma Pharmaceuticals Plc) Ibuprofen 400mg Tablet Oral

62251 Arcoxia 90mg tablets (Sigma Pharmaceuticals Plc) Etoricoxib 90mg Tablet Oral  
45331 Ibuprofen 200mg Tablet (Co-Pharma Ltd) Ibuprofen 200mg Tablet Oral  
76342 Ibuprofen 200mg tablets (Bristol Laboratories Ltd) Ibuprofen 200mg Tablet Oral  
Dicloflex 75mg SR tablets (Actavis UK Ltd) Diclofenac sodium 75mg Modified-release  
46844 tablet Oral  
Rheuflex 250mg Tablet (Goldshield Pharmaceuticals Ltd) Naproxen 250mg Tablet  
25750 Oral  
Diclofenac sodium 100mg modified-release tablets (Sigma Pharmaceuticals Plc)  
69584 Diclofenac sodium 100mg Modified-release tablet Oral  
34931 Ibuprofen 200mg Tablet (Regent Laboratories Ltd) Ibuprofen 200mg Tablet Oral  
3935 Feldene 20 capsules (Pfizer Ltd) Piroxicam 20mg Capsule Oral  
Flamrase SR 100mg tablets (Teva UK Ltd) Diclofenac sodium 100mg Modified-release  
10917 tablet Oral  
Nurofen for children 3 months to 9 years 100mg/5ml Oral suspension (Reckitt  
35265 Benckiser Healthcare (UK) Ltd) Ibuprofen 100mg/5ml Oral Suspension Oral  
Mefenamic acid 500mg tablets (IVAX Pharmaceuticals UK Ltd) Mefenamic acid  
32234 500mg Tablet Oral  
Indometacin 75mg modified-release capsules (A A H Pharmaceuticals Ltd)  
34190 Indometacin 75mg Modified-release capsule Oral  
Dicloflex 25mg gastro-resistant tablets (Teva UK Ltd) Diclofenac sodium 25mg Gastro-  
35711 resistant tablet Oral

71968 Ibuprofen 400mg capsules (Ennogen Healthcare Ltd) Ibuprofen 400mg Capsule Oral

36597 Hedex Ibuprofen 200mg tablets (Omega Pharma Ltd) Ibuprofen 200mg Tablet Oral

Arthrotec 50 gastro-resistant tablets (Mawdsley-Brooks & Company Ltd) Diclofenac  
71088 sodium/Misoprostol 50mg + 200microgram Gastro-resistant tablet Oral  
Lodine sr 600mg Modified-release tablet (Shire Pharmaceuticals Ltd) Etodolac 600mg  
5266 Modified-release tablet Oral  
45216 Ibuprofen 400mg Tablet (C P Pharmaceuticals Ltd) Ibuprofen 400mg Tablet Oral  
Ibuprofen 400mg capsules (AM Distributions (Yorkshire) Ltd) Ibuprofen 400mg  
63036 Capsule Oral  
Dicloflex 75mg SR tablets (Dexcel-Pharma Ltd) Diclofenac sodium 75mg Modified-  
9222 release tablet Oral  
Ketpron XL 200mg capsules (Mercury Pharma Group Ltd) Ketoprofen 200mg  
31962 Modified-release capsule Oral  
3974 Tenoxicam 20mg tablets Tenoxicam 20mg Tablet Oral  
Naproxen 500mg gastro-resistant tablets (Alliance Healthcare (Distribution) Ltd)  
53626 Naproxen 500mg Gastro-resistant tablet Oral  
Diclofenac sodium 50mg gastro-resistant tablets (Genesis Pharmaceuticals Ltd)  
50785 Diclofenac sodium 50mg Gastro-resistant tablet Oral  
Rhumalgan CR 100 tablets (Sandoz Ltd) Diclofenac sodium 100mg Modified-release  
21610 tablet Oral  
Care Ibuprofen for Children 100mg/5ml oral suspension (Thornton & Ross Ltd)  
66194 Ibuprofen 20mg/1ml Oral suspension Oral  
68097 Naproxen 250mg tablets (Crescent Pharma Ltd) Naproxen 250mg Tablet Oral

38332 Ibucalm 200mg tablets (Aspar Pharmaceuticals Ltd) Ibuprofen 200mg Tablet Oral

Meloxicam 7.5mg tablets (Mawdsley-Brooks & Company Ltd) Meloxicam 7.5mg  
79307 Tablet Oral  
Closteril 100mg Modified-release tablet (Pharmalife Healthcare Services Ltd)  
28764 Diclofenac sodium 100mg Modified-release tablet Oral  
Ibuprofen 200mg orodispersible tablets sugar free Ibuprofen 200mg Orodispersible  
5648 tablet Oral  
Ketoprofen cr 100mg Capsule (Bristol-Myers Squibb Pharmaceuticals Ltd) Ketoprofen  
75581 100mg Modified-release capsule Oral  
1468 Ibuprofen 200mg Soluble tablet Ibuprofen 200mg Soluble Tablet Oral  
Nurofen Express 342mg caplets (Reckitt Benckiser Healthcare (UK) Ltd) Ibuprofen  
37731 lysine 200mg Tablet Oral  
Orbifen for children 100mg/5ml Oral suspension (Orbis Consumer Products Ltd)  
18196 Ibuprofen 100mg/5ml Oral Suspension Oral  
39317 Naproxen 500mg tablets (Wockhardt UK Ltd) Naproxen 500mg Tablet Oral  
25257 Advil 200mg tablets (Wyeth Consumer Healthcare) Ibuprofen 200mg Tablet Oral  
Froben SR 200mg capsules (Abbott Laboratories Ltd) Flurbiprofen 200mg Modified-  
38944 release capsule Oral  
Dicloflex 75mg SR tablets (Almus Pharmaceuticals Ltd) Diclofenac sodium 75mg  
29181 Modified-release tablet Oral  
Indometacin 25mg Capsule (Approved Prescription Services Ltd) Indometacin 25mg  
41521 Capsule Oral  
62892 Ibuprofen 200mg tablets (Wockhardt UK Ltd) Ibuprofen 200mg Tablet Oral  
62840 Celebrex 100mg capsules (DE Pharmaceuticals) Celecoxib 100mg Capsule Oral  
849 Ibumed 400mg Tablet (Medipharma Ltd) Ibuprofen 400mg Tablet Oral  
5482 Sulindac 200mg tablets Sulindac 200mg Tablet Oral  
Piroxicam 20mg capsules (Approved Prescription Services Ltd) Piroxicam 20mg  
74659 Capsule Oral  
Relifex 500mg/5ml oral suspension (Meda Pharmaceuticals Ltd) Nabumetone  
10295 100mg/1ml Oral suspension Oral

34980 Ibuprofen 200mg tablets sugar coated (Actavis UK Ltd) Ibuprofen 200mg Tablet Oral  
Dicloflex 25mg Gastro-resistant tablet (Ratiopharm UK Ltd) Diclofenac sodium 25mg  
20105 Gastro-resistant tablet Oral  
Diclofenac sodium 100mg modified-release tablets (Ethigen Ltd) Diclofenac sodium  
66123 100mg Modified-release tablet Oral  
628 Diclofenac potassium 25mg tablets Diclofenac potassium 25mg Tablet Oral  
80442 Arcoxia 60mg tablets (DE Pharmaceuticals) Etoricoxib 60mg Tablet Oral  
Mobiflex 20mg Effervescent tablet (Roche Products Ltd) Tenoxicam 20mg  
24531 Effervescent Tablet Oral

39109 Feldene Melt 20mg tablets (Pfizer Ltd) Piroxicam 20mg Orodispersible tablet Oral

32100 Ibuprofen 600mg tablets (A A H Pharmaceuticals Ltd) Ibuprofen 600mg Tablet Oral  
Voltarol Retard 100mg tablets (Sigma Pharmaceuticals Plc) Diclofenac sodium 100mg  
54021 Modified-release tablet Oral  
Naproxen 125mg/5ml oral suspension sugar free Naproxen 25mg/1ml Oral  
66993 suspension Oral

77421 Relifex 500mg tablets (Waymade Healthcare Plc) Nabumetone 500mg Tablet Oral

Mefenamic acid 50mg/5ml oral suspension Mefenamic acid 10mg/1ml Oral  
9736 suspension Oral  
Boots Period Pain Relief 250mg gastro-resistant tablets (The Boots Company Plc)  
76073 Naproxen 250mg Gastro-resistant tablet Oral  
Boots Ibuprofen 6 Months Plus 100mg/5ml oral suspension strawberry (The Boots  
76093 Company Plc) Ibuprofen 20mg/1ml Oral suspension Oral  
Celebrex 100mg capsules (Mawdsley-Brooks & Company Ltd) Celecoxib 100mg  
52420 Capsule Oral  
24320 Indolar 50mg Capsule (Lagap) Indometacin 50mg Capsule Oral

77553 Celebrex 200mg capsules (Sigma Pharmaceuticals Plc) Celecoxib 200mg Capsule Oral  
Tiloket 200mg Modified-release capsule (Tillomed Laboratories Ltd) Ketoprofen  
27013 200mg Modified-release capsule Oral  
Ibuprofen 200mg tablets (Alliance Healthcare (Distribution) Ltd) Ibuprofen 200mg  
59553 Tablet Oral  
Ibuprofen 200mg modified-release capsules Ibuprofen 200mg Modified-release  
392 capsule Oral  
Diclofenac 100mg Modified-release tablet (Actavis UK Ltd) Diclofenac sodium 100mg  
27362 Modified-release tablet Oral  
Mefenamic acid 500mg tablets (Almus Pharmaceuticals Ltd) Mefenamic acid 500mg  
64103 Tablet Oral  
80017 Celecoxib 200mg capsules (Milpharm Ltd) Celecoxib 200mg Capsule Oral  
Nurofen for Children 100mg/5ml oral suspension orange (Reckitt Benckiser  
48738 Healthcare (UK) Ltd) Ibuprofen 20mg/1ml Oral suspension Oral  
63843 Naproxen 250mg tablets (Milpharm Ltd) Naproxen 250mg Tablet Oral  
Celecoxib 200mg capsules (Alliance Healthcare (Distribution) Ltd) Celecoxib 200mg  
65016 Capsule Oral  
6464 Arcoxia 60mg tablets (Merck Sharp & Dohme Ltd) Etoricoxib 60mg Tablet Oral  
50628 Ibuprofen 400mg caplets (The Boots Company Plc) Ibuprofen 400mg Tablet Oral  
Ketoprofen 100mg modified-release capsules (Alliance Healthcare (Distribution) Ltd)  
77459 Ketoprofen 100mg Modified-release capsule Oral

34889 Ibuprofen 400mg Tablet (Celltech Pharma Europe Ltd) Ibuprofen 400mg Tablet Oral  
Dexomon retard 100mg Modified-release tablet (Hillcross Pharmaceuticals Ltd)  
16225 Diclofenac sodium 100mg Modified-release tablet Oral  
28255 Naproxen 250mg tablets (Wockhardt UK Ltd) Naproxen 250mg Tablet Oral

120 Indocid 25mg capsules (Merck Sharp & Dohme Ltd) Indometacin 25mg Capsule Oral  
23323 Prosaid 500mg Tablet (BHR Pharmaceuticals Ltd) Naproxen 500mg Tablet Oral  
Diclofenac sodium 25mg gastro-resistant tablets (Kent Pharmaceuticals Ltd)  
53164 Diclofenac sodium 25mg Gastro-resistant tablet Oral

76595 Meloxicam 7.5mg/5ml oral suspension Meloxicam 1.5mg/1ml Oral suspension Oral  
40394 Advil 400mg Tablet (Wyeth Consumer Healthcare) Ibuprofen 400mg Tablet Oral  
41701 Ibuprofen 600mg tablets (Actavis UK Ltd) Ibuprofen 600mg Tablet Oral  
24020 Valrox 250mg Tablet (Shire Pharmaceuticals Ltd) Naproxen 250mg Tablet Oral  
Oruvail 150 modified-release capsules (Sanofi) Ketoprofen 150mg Modified-release  
40664 capsule Oral  
51242 Naproxen 500mg tablets (Pfizer Ltd) Naproxen 500mg Tablet Oral  
59709 Prontoderm solution (B.Braun Medical Ltd)



26095 Ibuprofen lysine 400mg tablets Ibuprofen lysine 400mg Tablet Oral  
     Diclofenac 50mg dispersible tablets sugar free Diclofenac sodium 50mg Dispersible  
     417 tablet Oral  
     Feverfen 100mg/5ml oral suspension (Wise Pharmaceuticals Ltd) Ibuprofen  
 25800 20mg/1ml Oral suspension Oral  
     Indometacin sr 75mg Capsule (Lagap) Indometacin 75mg Modified-release capsule  
 42003 Oral  
     Diclofenac 25mg Tablet (Berk Pharmaceuticals Ltd) Diclofenac sodium 25mg Gastro-  
 32536 resistant tablet Oral  
 32136 Ibular 200mg Tablet (Lagap) Ibuprofen 200mg Tablet Oral  
 30382 Ibuprofen 200mg Tablet (C P Pharmaceuticals Ltd) Ibuprofen 200mg Tablet Oral  
     Pranoxen continus 500mg Tablet (Napp Pharmaceuticals Ltd) Naproxen sodium  
 21816 500mg Modified-release tablet Oral  
     807 Naproxen 500mg tablets Naproxen 500mg Tablet Oral

21840 Arthrosin 250 tablets (Ashbourne Pharmaceuticals Ltd) Naproxen 250mg Tablet Oral

    Diclofenac sodium 75mg gastro-resistant / Misoprostol 200microgram tablets  
 4880 Diclofenac sodium/Misoprostol 75mg + 200microgram Gastro-resistant tablet Oral  
     Lofensaid 25mg gastro-resistant tablets (Opus Pharmaceuticals Ltd) Diclofenac  
 25329 sodium 25mg Gastro-resistant tablet Oral  
 34425 Ibuprofen 400mg Tablet (Family Health) Ibuprofen 400mg Tablet Oral  
     4368 Lodine 200mg Capsule (Shire Pharmaceuticals Ltd) Etodolac 200mg Capsule Oral  
 20230 Salsalate 500mg capsules Salsalate 500mg Capsules Oral

    647 Ibuprofen 100mg/5ml oral suspension Ibuprofen 20mg/1ml Oral suspension Oral  
 67740 Ibuprofen 600mg tablets (Fannin UK Ltd) Ibuprofen 600mg Tablet Oral  
 59246 Naproxen 500mg tablets (Accord Healthcare Ltd) Naproxen 500mg Tablet Oral

41513 Ibuprofen 200mg tablets (IVAX Pharmaceuticals UK Ltd) Ibuprofen 200mg Tablet Oral  
 32242 Ibuprofen 400mg tablets (Sterwin Medicines) Ibuprofen 400mg Tablet Oral  
     Diclofenac 25mg Gastro-resistant tablet (Pharmacia Ltd) Diclofenac sodium 25mg  
 34218 Gastro-resistant tablet Oral  
     Naproxen 500mg gastro-resistant tablets (Teva UK Ltd) Naproxen 500mg Gastro-  
 27366 resistant tablet Oral  
     Voltarol 50mg dispersible tablets (Novartis Pharmaceuticals UK Ltd) Diclofenac  
     589 sodium 50mg Dispersible tablet Oral

61235 Meloxicam 7.5mg tablets (Sigma Pharmaceuticals Plc) Meloxicam 7.5mg Tablet Oral

    Diclofenac sodium 50mg gastro-resistant / Misoprostol 200microgram tablets  
 1692 Diclofenac sodium/Misoprostol 50mg + 200microgram Gastro-resistant tablet Oral  
     Etodolac 600mg modified-release tablets (Alliance Healthcare (Distribution) Ltd)  
 52714 Etodolac 600mg Modified-release tablet Oral  
     Rheumacin LA 75mg capsules (Hillcross Pharmaceuticals Ltd) Indometacin 75mg  
 18234 Modified-release capsule Oral  
 60705 Meloxicam 15mg tablets (Niche Generics Ltd) Meloxicam 15mg Tablet Oral  
 37094 Cuprofen 200mg tablets (SSL International Plc) Ibuprofen 200mg Tablet Oral

Misofen 75mg/200microgram gastro-resistant tablets (Morningside Healthcare Ltd)  
58842 Diclofenac sodium/Misoprostol 75mg + 200microgram Gastro-resistant tablet Oral  
Voltarol 50mg gastro-resistant tablets (Novartis Pharmaceuticals UK Ltd) Diclofenac  
4631 sodium 50mg Gastro-resistant tablet Oral  
Diclofenac sodium 100mg modified-release tablets (AM Distributions (Yorkshire) Ltd)  
59289 Diclofenac sodium 100mg Modified-release tablet Oral  
56275 Meloxicam 7.5mg tablets (Teva UK Ltd) Meloxicam 7.5mg Tablet Oral  
37750 Piroxicam 20mg capsules (Mylan) Piroxicam 20mg Capsule Oral  
Voltarol 75mg SR tablets (Novartis Pharmaceuticals UK Ltd) Diclofenac sodium 75mg  
4625 Modified-release tablet Oral

21846 Pirozip 20 capsules (Ashbourne Pharmaceuticals Ltd) Piroxicam 20mg Capsule Oral  
Dysman 250mg Capsule (Ashbourne Pharmaceuticals Ltd) Mefenamic acid 250mg  
21831 Capsule Oral  
1757 Choline Mg trisilicylate 500mg tablets Magnesium Trisilicate 500mg Tablets Oral  
Fenbuzip 300mg Capsule (Ashbourne Pharmaceuticals Ltd) Fenbufen 300mg Capsule  
26205 Oral  
Dicloflex sr 75mg Tablet (Genus Pharmaceuticals Ltd) Diclofenac sodium 75mg  
30790 Modified-release tablet Oral  
71949 Flarin 200mg capsules (infirst Healthcare Ltd) Ibuprofen 200mg Capsule Oral  
24682 Tenoxicam 20mg effervescent tablets Tenoxicam 20mg Effervescent Tablet Oral  
Contraflam 250mg Capsule (Berk Pharmaceuticals Ltd) Mefenamic acid 250mg  
30389 Capsule Oral  
Diclofenac potassium 25mg tablets (A A H Pharmaceuticals Ltd) Diclofenac potassium  
58572 25mg Tablet Oral  
Diclofenac sodium 75mg modified-release capsules Diclofenac sodium 75mg  
447 Modified-release capsule Oral  
2863 Tiaprofenic acid 300mg tablets Tiaprofenic acid 300mg Tablet Oral  
4309 Ibuprofen lysine 200mg tablets Ibuprofen lysine 200mg Tablet Oral  
Diclofenac 50mg dispersible tablets sugar free (Sigma Pharmaceuticals Plc)  
59595 Diclofenac sodium 50mg Dispersible tablet Oral

68220 Ibuprofen 200mg capsules (Ennogen Healthcare Ltd) Ibuprofen 200mg Capsule Oral  
Nurofen Express 256mg caplets (Reckitt Benckiser Healthcare (UK) Ltd) Ibuprofen  
39758 sodium dihydrate 200mg Tablet Oral  
Ibuprofen 100mg/5ml oral suspension sugar free (Kent Pharmaceuticals Ltd)  
51828 Ibuprofen 20mg/1ml Oral suspension Oral  
Diclomax 100mg Modified-release capsule (Provalis Healthcare Ltd) Diclofenac  
3852 sodium 100mg Modified-release capsule Oral  
Vimovo 500mg/20mg modified-release tablets (AstraZeneca UK Ltd)  
Naproxen/Esomeprazole magnesium trihydrate 500mg + 20mg Modified-release  
44986 tablet Oral  
24305 Ibufac 400mg Tablet (DDSA Pharmaceuticals Ltd) Ibuprofen 400mg Tablet Oral

67594 Ibuprofen 400mg tablets (Kent Pharmaceuticals Ltd) Ibuprofen 400mg Tablet Oral  
Ketotard XL 200mg capsules (Galen Ltd) Ketoprofen 200mg Modified-release capsule  
29772 Oral  
Diclofenac sodium 50mg gastro-resistant tablets (Mylan) Diclofenac sodium 50mg  
21387 Gastro-resistant tablet Oral

7524 Feldene 20mg dispersible tablets (Pfizer Ltd) Piroxicam 20mg Dispersible tablet Oral  
7434 Clinoril 100mg tablets (Merck Sharp & Dohme Ltd) Sulindac 100mg Tablet Oral  
34793 Mefenamic acid 250mg capsules (Zentiva) Mefenamic acid 250mg Capsule Oral

34922 Naproxen 500mg Tablet (Berk Pharmaceuticals Ltd) Naproxen 500mg Tablet Oral  
40336 Orudis 50mg capsules (Sanofi) Ketoprofen 50mg Capsule Oral  
Ibuprofen 400mg tablets (Phoenix Healthcare Distribution Ltd) Ibuprofen 400mg  
75677 Tablet Oral  
41524 Mefenamic acid 500mg tablets (Teva UK Ltd) Mefenamic acid 500mg Tablet Oral  
56584 Arcoxia 60mg tablets (Lexon (UK) Ltd) Etoricoxib 60mg Tablet Oral  
29749 Ibuprofen 200mg tablets (Ranbaxy (UK) Ltd) Ibuprofen 200mg Tablet Oral  
32365 Relcofen 400mg tablets (Actavis UK Ltd) Ibuprofen 400mg Tablet Oral  
Rhumalgan 50mg Tablet (Lagap) Diclofenac sodium 50mg Gastro-resistant tablet  
30806 Oral  
Naproxen 250mg Gastro-resistant tablet (Almus Pharmaceuticals Ltd) Naproxen  
47994 250mg Gastro-resistant tablet Oral

60368 Diclofenac 10mg/5ml oral solution Diclofenac sodium 2mg/1ml Oral solution Oral  
Diclofenac sodium 50mg gastro-resistant / Misoprostol 200microgram tablets (A A H  
Pharmaceuticals Ltd) Diclofenac sodium/Misoprostol 50mg + 200microgram Gastro-  
58415 resistant tablet Oral  
Brufen 100mg/5ml syrup (Mawdsley-Brooks & Company Ltd) Ibuprofen 20mg/1ml  
53397 Oral suspension Oral  
Nurofen Long Lasting 300mg capsules (Crookes Healthcare Ltd) Ibuprofen 300mg  
22206 Modified-release capsule Oral  
46921 Ibuprofen 400mg tablets (Ranbaxy (UK) Ltd) Ibuprofen 400mg Tablet Oral  
Feldene Melt 20mg tablets (Sigma Pharmaceuticals Plc) Piroxicam 20mg  
73981 Orodispersible tablet Oral  
Junifen 100mg/5ml Oral suspension (Crookes Healthcare Ltd) Ibuprofen 100mg/5ml  
1030 Oral Suspension Oral

7426 Lederfen 300mg Capsule (Wyeth Pharmaceuticals) Fenbufen 300mg Capsule Oral  
Fenactol Retard 100mg tablets (Dexcel-Pharma Ltd) Diclofenac sodium 100mg  
17525 Modified-release tablet Oral  
Anadin Ultra 200mg capsules (Pfizer Consumer Healthcare Ltd) Ibuprofen 200mg  
40516 Capsule Oral  
Indometacin 25mg capsules (Alliance Healthcare (Distribution) Ltd) Indometacin  
60930 25mg Capsule Oral  
Naproxen 250mg gastro-resistant tablets Naproxen 250mg Gastro-resistant tablet  
3431 Oral  
Piroxicam 10mg capsules (Approved Prescription Services Ltd) Piroxicam 10mg  
77694 Capsule Oral  
Brufen Retard 800mg tablets (Dowelhurst Ltd) Ibuprofen 800mg Modified-release  
74806 tablet Oral  
Diclomax SR 75mg capsules (Galen Ltd) Diclofenac sodium 75mg Modified-release  
38881 capsule Oral  
Naproxen 50mg/ml oral suspension (DE Pharmaceuticals) Naproxen 50mg/1ml Oral  
80679 suspension Oral

Galprofen Long Lasting 300mg capsules (Galpharm International Ltd) Ibuprofen  
75305 300mg Modified-release capsule Oral

24308 Slo-Indo 75mg capsules (Mylan) Indometacin 75mg Modified-release capsule Oral  
Dicloflex 75mg SR tablets (Kent Pharmaceuticals Ltd) Diclofenac sodium 75mg

20621 Modified-release tablet Oral  
Naproxen 250mg gastro-resistant tablets (A A H Pharmaceuticals Ltd) Naproxen

34738 250mg Gastro-resistant tablet Oral

11495 Piroxicam betadex 20mg tablets Piroxicam betadex 20mg Tablet Oral  
Brufen 600mg effervescent granules sachets (DE Pharmaceuticals) Ibuprofen 600mg

50314 Effervescent granules Oral  
Anadin Ultra liquid capsules (Wyeth Consumer Healthcare) Ibuprofen 200mg Capsule

20978 Oral  
Voltarol 100mg suppositories (Novartis Pharmaceuticals UK Ltd) Diclofenac sodium

4806 100mg Suppository Rectal  
Arthrotec 75 gastro-resistant tablets (Lexon (UK) Ltd) Diclofenac sodium/Misoprostol

65528 75mg + 200microgram Gastro-resistant tablet Oral  
917 Diclofenac sodium 50mg tablets Diclofenac Sodium 50mg Tablets Oral  
Naproxen 500mg Gastro-resistant tablet (Galen Ltd) Naproxen 500mg Gastro-

34977 resistant tablet Oral  
Defanac 75mg SR tablets (Ranbaxy (UK) Ltd) Diclofenac sodium 75mg Modified-

14672 release tablet Oral

80671 Celecoxib 100mg capsules (Brown & Burk UK Ltd) Celecoxib 100mg Capsule Oral  
Diclofenac 50mg Tablet (Berk Pharmaceuticals Ltd) Diclofenac sodium 50mg Gastro-

28256 resistant tablet Oral  
Diclofenac 25mg Tablet (C P Pharmaceuticals Ltd) Diclofenac sodium 25mg Gastro-

75136 resistant tablet Oral  
Naproxen 250mg tablets (Phoenix Healthcare Distribution Ltd) Naproxen 250mg

53980 Tablet Oral  
Indometacin 25mg Capsule (Meridian Healthcare (UK) Ltd) Indometacin 25mg

45256 Capsule Oral  
Diclofenac sodium 100mg modified-release tablets Diclofenac sodium 100mg

3416 Modified-release tablet Oral  
Acoflam 50mg gastro-resistant tablets (Mercury Pharma Group Ltd) Diclofenac

40086 sodium 50mg Gastro-resistant tablet Oral  
Boots Ibuprofen 3 Months Plus 100mg/5ml oral suspension strawberry (The Boots

71584 Company Plc) Ibuprofen 20mg/1ml Oral suspension Oral  
Oruvail 200 modified-release capsules (Lexon (UK) Ltd) Ketoprofen 200mg Modified-

67803 release capsule Oral  
Medifen 3with months 100mg/5ml Oral suspension (SSL International Plc) Ibuprofen

46342 100mg/5ml Oral Suspension Oral

39085 Naproxen 250mg tablets (A A H Pharmaceuticals Ltd) Naproxen 250mg Tablet Oral  
Diclofenac diethylammonium 1.16% gel Diclofenac diethylammonium 11.6mg/1gram

156 Gel Transdermal  
Dicloflex sr 100mg Tablet (IVAX Pharmaceuticals UK Ltd) Diclofenac sodium 100mg

17124 Modified-release tablet Oral

29316 Care ibuprofen 400mg Tablet (Thornton & Ross Ltd) Ibuprofen 400mg Tablet Oral

Diclofenac potassium 50mg tablets (Accord Healthcare Ltd) Diclofenac potassium  
43045 50mg Tablet Oral

34729 Ibuprofen 400mg tablets (OBG Pharmaceuticals Ltd) Ibuprofen 400mg Tablet Oral  
416 Ibuprofen 200mg tablets Ibuprofen 200mg Tablet Oral

45842 Ibuprofen 600mg Tablet (Celltech Pharma Europe Ltd) Ibuprofen 600mg Tablet Oral  
37587 Etoricoxib 30mg tablets Etoricoxib 30mg Tablet Oral

76191 Meloxicam 7.5mg tablets (A A H Pharmaceuticals Ltd) Meloxicam 7.5mg Tablet Oral  
34757 Ibuprofen 400mg Tablet (Unichem) Ibuprofen 400mg Tablet Oral  
Butazolidin 200mg Tablet (Novartis Pharmaceuticals UK Ltd) Phenylbutazone 200mg  
29674 Tablet Oral  
Flamatak MR 75mg tablets (Actavis UK Ltd) Diclofenac sodium 75mg Modified-  
20395 release tablet Oral  
Dicloflex Retard 100mg tablets (Dexcel-Pharma Ltd) Diclofenac sodium 100mg  
39264 Modified-release tablet Oral  
27723 Phenylbutazone 200mg tablets Phenylbutazone 200mg Tablet Oral  
Naproxen 375mg Modified-release tablet Naproxen 375mg Modified-Release Tablet  
15023 Oral  
Apsifen 400mg Tablet (Approved Prescription Services Ltd) Ibuprofen 400mg Tablet  
27968 Oral  
69266 Fusidic acid 2% cream (Teva UK Ltd) Fusidic acid 20mg/1gram Cream Cutaneous  
Orbifen For Children 100mg/5ml oral suspension (Orbis Consumer Products Ltd)  
51943 Ibuprofen 20mg/1ml Oral suspension Oral  
Diclofenac 12.5mg/5ml oral suspension Diclofenac sodium 2.5mg/1ml Oral  
68849 suspension Oral  
Mefenamic acid 250mg capsules (A A H Pharmaceuticals Ltd) Mefenamic acid 250mg  
34438 Capsule Oral  
Naproxen 250mg Gastro-resistant tablet (Galen Ltd) Naproxen 250mg Gastro-  
34670 resistant tablet Oral  
72972 Indometacin Oral solution Indometacin Oral Solution

37553 Ibucalm 400mg tablets (Aspar Pharmaceuticals Ltd) Ibuprofen 400mg Tablet Oral  
Rhumalgan XL 100mg capsules (Sandoz Ltd) Diclofenac sodium 100mg Modified-  
26631 release capsule Oral  
Galprofen Long Lasting 200mg capsules (Galpharm International Ltd) Ibuprofen  
28888 200mg Modified-release capsule Oral  
Apsifen 200mg Tablet (Approved Prescription Services Ltd) Ibuprofen 200mg Tablet  
31482 Oral

28695 Piroflam 10mg Capsule (Opus Pharmaceuticals Ltd) Piroxicam 10mg Capsule Oral  
Clotam 200mg Capsule (Thames Laboratories Ltd) Tolfenamic Acid 200mg Capsule  
20036 Oral

41622 Piroxicam 10mg capsules (A A H Pharmaceuticals Ltd) Piroxicam 10mg Capsule Oral  
Naproxen 250mg gastro-resistant tablets (Sigma Pharmaceuticals Plc) Naproxen  
67363 250mg Gastro-resistant tablet Oral  
Mefenamic acid 500mg tablets (Waymade Healthcare Plc) Mefenamic acid 500mg  
66452 Tablet Oral

21123 Piroxicam 20mg Capsule (Berk Pharmaceuticals Ltd) Piroxicam 20mg Capsule Oral  
Diclovol 25mg gastro-resistant tablets (Arun Pharmaceuticals Ltd) Diclofenac sodium  
25361 25mg Gastro-resistant tablet Oral  
Piroxicam 20mg orodispersible tablets sugar free Piroxicam 20mg Orodispersible  
4965 tablet Oral  
58213 Naproxen 500mg tablets (Milpharm Ltd) Naproxen 500mg Tablet Oral

46942 Ibuprofen 600mg tablets (IVAX Pharmaceuticals UK Ltd) Ibuprofen 600mg Tablet Oral  
Nurofen Plus tablets (Reckitt Benckiser Healthcare (UK) Ltd) Ibuprofen/Codeine  
13893 phosphate 200mg + 12.8mg Tablet Oral

48138 Ibuprofen 200mg tablets (Aspar Pharmaceuticals Ltd) Ibuprofen 200mg Tablet Oral  
Nycopren 500mg gastro-resistant tablets (Ardern Healthcare Ltd) Naproxen 500mg  
17165 Gastro-resistant tablet Oral  
Indometacin 50mg capsules (Almus Pharmaceuticals Ltd) Indometacin 50mg Capsule  
58523 Oral  
Ibuprofen Seven Plus Pain Relief 200mg/5ml oral suspension (Aspire Pharma Ltd)  
78978 Ibuprofen 40mg/1ml Oral suspension Oral

34923 Naproxen 250mg Tablet (Berk Pharmaceuticals Ltd) Naproxen 250mg Tablet Oral  
Indometacin 25mg capsules (A A H Pharmaceuticals Ltd) Indometacin 25mg Capsule  
32641 Oral  
Diclofenac sodium 50mg gastro-resistant tablets (Phoenix Healthcare Distribution  
54518 Ltd) Diclofenac sodium 50mg Gastro-resistant tablet Oral  
Ketpron XL 100mg capsules (Mercury Pharma Group Ltd) Ketoprofen 100mg  
27082 Modified-release capsule Oral  
Solpaflex tablets (GlaxoSmithKline Consumer Healthcare) Ibuprofen/Codeine  
25330 phosphate 200mg + 12.8mg Tablet Oral  
Mefenamic acid 250mg Capsule (IVAX Pharmaceuticals UK Ltd) Mefenamic acid  
41677 250mg Capsule Oral  
Ketoprofen 100mg modified-release capsules Ketoprofen 100mg Modified-release  
1571 capsule Oral  
Naproxen 500mg gastro-resistant tablets (Ranbaxy (UK) Ltd) Naproxen 500mg Gastro-  
58708 resistant tablet Oral  
Nurofen 200mg caplets (Reckitt Benckiser Healthcare (UK) Ltd) Ibuprofen 200mg  
35890 Tablet Oral

51829 Naproxen 250mg tablets (Kent Pharmaceuticals Ltd) Naproxen 250mg Tablet Oral  
18364 Ibular 400mg Tablet (Lagap) Ibuprofen 400mg Tablet Oral  
Naproxen 500mg gastro-resistant tablets (Sigma Pharmaceuticals Plc) Naproxen  
76869 500mg Gastro-resistant tablet Oral  
Naproxen 500mg gastro-resistant tablets (Waymade Healthcare Plc) Naproxen  
60408 500mg Gastro-resistant tablet Oral  
Nurofen Express Period Pain 200mg capsules (Reckitt Benckiser Healthcare (UK) Ltd)  
61878 Ibuprofen 200mg Capsule Oral  
Naproxen 500mg gastro-resistant tablets (Almus Pharmaceuticals Ltd) Naproxen  
65952 500mg Gastro-resistant tablet Oral  
Naproxen 500mg gastro-resistant tablets (IVAX Pharmaceuticals UK Ltd) Naproxen  
77680 500mg Gastro-resistant tablet Oral

25643 Surgam 300mg Sachets (Sanofi) Tiaprofenic Acid 300mg Sachets Oral  
 Voltarol sr 75mg Modified-release tablet (Novartis Pharmaceuticals UK Ltd)

1766 Diclofenac sodium 75mg Modified-release tablet Oral

2234 Nabumetone 500mg tablets Nabumetone 500mg Tablet Oral  
 Diclofenac sodium 50mg gastro-resistant tablets (DE Pharmaceuticals) Diclofenac

74211 sodium 50mg Gastro-resistant tablet Oral  
 Naproxen 125mg/5ml oral suspension sugar free (A A H Pharmaceuticals Ltd)

78985 Naproxen 25mg/1ml Oral suspension Oral  
 Diclofenac sodium 75mg gastro-resistant modified-release capsules Diclofenac

2904 sodium 75mg Modified-release capsule Oral  
 Brufen 600mg effervescent granules sachets (Mylan) Ibuprofen 600mg Effervescent

407 granules Oral  
 Diclofenac 75mg Modified-release capsule (Sandoz Ltd) Diclofenac sodium 75mg

32916 Modified-release capsule Oral

24007 Valrox 500mg Tablet (Shire Pharmaceuticals Ltd) Naproxen 500mg Tablet Oral

56925 Naproxen 250mg tablets (Actavis UK Ltd) Naproxen 250mg Tablet Oral  
 Diclofenac sodium 25mg gastro-resistant tablets (Sandoz Ltd) Diclofenac sodium

34091 25mg Gastro-resistant tablet Oral

46940 Ketoprofen 100mg capsules (Mylan) Ketoprofen 100mg Capsule Oral  
 Indomax 25mg Capsule (Ashbourne Pharmaceuticals Ltd) Indometacin 25mg Capsule

17750 Oral  
 Keral 25mg tablets (A. Menarini Farmaceutica Internazionale SRL) Dexketoprofen

9637 trometamol 25mg Tablet Oral

27783 Ibuprofen 400mg tablets sugar coated (Actavis UK Ltd) Ibuprofen 400mg Tablet Oral  
 Voltarol Rapid 50mg tablets (Stephar (U.K.) Ltd) Diclofenac potassium 50mg Tablet

70145 Oral  
 Ibuprofen 200mg tablets (Phoenix Healthcare Distribution Ltd) Ibuprofen 200mg

80366 Tablet Oral

10325 Dexibuprofen 300mg tablets Dexibuprofen 300mg Tablet Oral

10678 Fenopron 300 tablets (Typharm Ltd) Fenoprofen calcium 300mg Tablet Oral  
 Etodolac 600mg modified-release tablets Etodolac 600mg Modified-release tablet

5455 Oral  
 Butazolidin 100mg Tablet (Novartis Pharmaceuticals UK Ltd) Phenylbutazone 100mg

7483 Gastro-resistant tablet Oral  
 Diclofenac 75mg Modified-release tablet (Actavis UK Ltd) Diclofenac sodium 75mg

42905 Modified-release tablet Oral  
 Diclofenac sodium 50mg gastro-resistant tablets Diclofenac sodium 50mg Gastro-

40 resistant tablet Oral

51284 Arcoxia 60mg tablets (Sigma Pharmaceuticals Plc) Etoricoxib 60mg Tablet Oral  
 Indometacin 75mg modified-release capsules (DE Pharmaceuticals) Indometacin

68708 75mg Modified-release capsule Oral

70828 Naproxen 500mg tablets (DE Pharmaceuticals) Naproxen 500mg Tablet Oral

37053 Migrafen 200mg tablets (Chatfield Laboratories) Ibuprofen 200mg Tablet Oral

5173 Dexketoprofen 25mg tablets Dexketoprofen trometamol 25mg Tablet Oral  
 Naproxen 250mg gastro-resistant tablets (Phoenix Healthcare Distribution Ltd)

72047 Naproxen 250mg Gastro-resistant tablet Oral  
 Boots Ibuprofen Long Lasting 200mg capsules (The Boots Company Plc) Ibuprofen

71779 200mg Modified-release capsule Oral

Ketovail 200mg modified-release capsules (Teva UK Ltd) Ketoprofen 200mg Modified-  
 25701 release capsule Oral  
 Nurofen Meltlets 200mg tablets (Reckitt Benckiser Healthcare (UK) Ltd) Ibuprofen  
 11550 200mg Orodispersible tablet Oral  
 Diclozip 25mg gastro-resistant tablets (Ashbourne Pharmaceuticals Ltd) Diclofenac  
 16221 sodium 25mg Gastro-resistant tablet Oral  
 15104 Naproxen 500mg Granules Naproxen 500mg Granules Oral  
 Mandafen for Children 100mg/5ml oral suspension sugar free (M & A Pharmachem  
 30892 Ltd) Ibuprofen 20mg/1ml Oral suspension Oral  
 Diclofenac sodium 75mg modified-release tablets (Mawdsley-Brooks & Company  
 65877 Ltd) Diclofenac sodium 75mg Modified-release tablet Oral  
 Volraman 50mg gastro-resistant tablets (LPC Medical (UK) Ltd) Diclofenac sodium  
 15201 50mg Gastro-resistant tablet Oral  
 Diclotard 100 100mg Modified-release tablet (Galen Ltd) Diclofenac sodium 100mg  
 9465 Modified-release tablet Oral  
  
 7535 Nurofen 200mg Capsule (Crookes Healthcare Ltd) Ibuprofen 200mg Capsule Oral  
  
 70904 Indometacin 25mg capsules (Crescent Pharma Ltd) Indometacin 25mg Capsule Oral  
 29524 Ibuprofen 600mg Tablet (Alfred Benzon (UK) Ltd) Ibuprofen 600mg Tablet Oral  
 23121 Arthrofen 500mg Tablet (C P Pharmaceuticals Ltd) Naproxen 500mg Tablet Oral  
  
 40083 Ibuprofen 200mg caplets (Galpharm International Ltd) Ibuprofen 200mg Tablet Oral  
 Calprofen 100mg/5ml Oral suspension (McNeil Products Ltd) Ibuprofen 100mg/5ml  
 7058 Oral Suspension Oral  
 Voltarol 25mg Tablet (Novartis Pharmaceuticals UK Ltd) Diclofenac sodium 25mg  
 1139 Gastro-resistant tablet Oral  
 10033 Etodolac 300mg capsules Etodolac 300mg Capsule Oral  
 54304 Naproxen 500mg tablets (Actavis UK Ltd) Naproxen 500mg Tablet Oral  
 19007 Naprosyn 500mg Granules (Roche Products Ltd) Naproxen 500mg Granules Oral  
 Flamrase 75mg SR tablets (Teva UK Ltd) Diclofenac sodium 75mg Modified-release  
 38992 tablet Oral  
 34359 Ibuprofen 400mg tablets (Vantage) Ibuprofen 400mg Tablet Oral  
 Galpharm ibuprofen for children 100mg/5ml Oral suspension (Galpharm  
 39354 International Ltd) Ibuprofen 100mg/5ml Oral Suspension Oral  
 Flexotard MR 100mg tablets (Pfizer Ltd) Diclofenac sodium 100mg Modified-release  
 29455 tablet Oral  
 Voltarol 50mg dispersible tablets (Sigma Pharmaceuticals Plc) Diclofenac sodium  
 60786 50mg Dispersible tablet Oral  
 Naproxen 50mg/ml oral suspension (A A H Pharmaceuticals Ltd) Naproxen 50mg/1ml  
 71709 Oral suspension Oral  
 Nurofen for Children 100mg/5ml oral suspension strawberry (Reckitt Benckiser  
 49133 Healthcare (UK) Ltd) Ibuprofen 20mg/1ml Oral suspension Oral  
 560 Diflunisal 250mg tablets Diflunisal 250mg Tablet Oral  
 Diclofenac sodium 100mg modified-release capsules (DE Pharmaceuticals)  
 71307 Diclofenac sodium 100mg Modified-release capsule Oral  
 Ponstan 250mg capsules (Chemidex Pharma Ltd) Mefenamic acid 250mg Capsule  
 126 Oral  
  
 1688 Indocid 50mg capsules (Merck Sharp & Dohme Ltd) Indometacin 50mg Capsule Oral



Contraflam 500mg Tablet (Berk Pharmaceuticals Ltd) Mefenamic acid 500mg Tablet  
30391 Oral  
Cuprofen Maximum Strength 400mg tablets (Reckitt Benckiser Healthcare (UK) Ltd)  
39873 Ibuprofen 400mg Tablet Oral  
Mefenamic acid 250mg capsules (Waymade Healthcare Plc) Mefenamic acid 250mg  
75569 Capsule Oral

33357 Pacifene 200mg tablets (Sussex Pharmaceutical Ltd) Ibuprofen 200mg Tablet Oral  
1469 Meloxicam 15mg tablets Meloxicam 15mg Tablet Oral  
Anadin Joint Pain 200mg tablets (Pfizer Consumer Healthcare Ltd) Ibuprofen 200mg  
38493 Tablet Oral  
Volsaid Retard 100 tablets (Chiesi Ltd) Diclofenac sodium 100mg Modified-release  
11168 tablet Oral  
Mefenamic acid 500mg tablets (Essential Generics Ltd) Mefenamic acid 500mg  
61581 Tablet Oral  
Naproxen 250mg tablets (Mawdsley-Brooks & Company Ltd) Naproxen 250mg Tablet  
77951 Oral  
Mefenamic acid 250mg capsules (Alliance Healthcare (Distribution) Ltd) Mefenamic  
70221 acid 250mg Capsule Oral  
48062 Ibuprofen 200mg Tablet (Wockhardt UK Ltd) Ibuprofen 200mg Tablet Oral  
Naproxen 250mg gastro-resistant tablets (DE Pharmaceuticals) Naproxen 250mg  
75095 Gastro-resistant tablet Oral  
21419 Seractil 300mg tablets (Thornton & Ross Ltd) Dexibuprofen 300mg Tablet Oral  
Diclozip 50mg gastro-resistant tablets (Ashbourne Pharmaceuticals Ltd) Diclofenac  
16222 sodium 50mg Gastro-resistant tablet Oral

20385 Arthrosin 500 tablets (Ashbourne Pharmaceuticals Ltd) Naproxen 500mg Tablet Oral  
Naproxen 250mg gastro-resistant tablets (Almus Pharmaceuticals Ltd) Naproxen  
59878 250mg Gastro-resistant tablet Oral  
73156 Nimesulide (roi) 100mg Tablet Nimesulide 100mg Tablet  
Diclovol 75mg SR tablets (Mylan) Diclofenac sodium 75mg Modified-release tablet  
9688 Oral  
Butazone 100mg Tablet (DDSA Pharmaceuticals Ltd) Phenylbutazone 100mg Gastro-  
33308 resistant tablet Oral  
Indocid R 75mg capsules (Dowelhurst Ltd) Indometacin 75mg Modified-release  
77359 capsule Oral  
55313 Ibuprofen 400mg tablets (Boston Healthcare Ltd) Ibuprofen 400mg Tablet Oral  
Ketocid 200 modified-release capsules (Chiesi Ltd) Ketoprofen 200mg Modified-  
15286 release capsule Oral  
Proflex 300mg Modified-release capsule (Novartis Consumer Health UK Ltd)  
30811 Ibuprofen 300mg Modified-release capsule Oral  
6498 Arcoxia 90mg tablets (Merck Sharp & Dohme Ltd) Etoricoxib 90mg Tablet Oral  
Solpadeine Migraine Ibuprofen & Codeine tablets (Omega Pharma Ltd)  
39461 Ibuprofen/Codeine phosphate 200mg + 12.8mg Tablet Oral

73433 Ibuprofen 600mg tablets (Almus Pharmaceuticals Ltd) Ibuprofen 600mg Tablet Oral  
40253 Ibuprofen 600mg Tablet (Sovereign Medical Ltd) Ibuprofen 600mg Tablet Oral  
Voltarol 50mg dispersible tablets (Stephar (U.K.) Ltd) Diclofenac sodium 50mg  
54075 Dispersible tablet Oral  
8451 Etodolac 200mg Tablet Etodolac 200mg Tablet Oral

Naprosyn 125mg/5ml oral suspension (Roche Products Ltd) Naproxen 25mg/1ml  
 4320 Oral suspension Oral  
 Diclofenac sodium 25mg gastro-resistant tablets Diclofenac sodium 25mg Gastro-  
 649 resistant tablet Oral  
 Naproxen 250mg tablets (Alliance Healthcare (Distribution) Ltd) Naproxen 250mg  
 60115 Tablet Oral  
 Diclofenac 15mg/5ml oral suspension Diclofenac sodium 3mg/1ml Oral  
 80882 suspension Oral  
 Naproxen 500mg gastro-resistant tablets (Medreich Plc) Naproxen 500mg Gastro-  
 81056 resistant tablet Oral  
 Ibuprofen 100mg/5ml oral suspension sugar free (Actavis UK  
 81125 Ltd) Ibuprofen 20mg/1ml Oral suspension Oral  
 81403 Celecoxib 200mg capsules (Brown & Burk UK Ltd) Celecoxib 200mg Capsule Oral  
  
 81441 Naproxen 500mg tablets (Almus Pharmaceuticals Ltd) Naproxen 500mg Tablet Oral  
  
 81636 Ibuprofen 200mg tablets (Sussex Pharmaceutical Ltd) Ibuprofen 200mg Tablet Oral  
  
 Masidemen 75mg/200microgram gastro-resistant tablets (Actavis UK Ltd) Diclofenac  
 81644 sodium/Misoprostol 75mg + 200microgram Gastro-resistant tablet Oral  
 81720 Etoricoxib 90mg tablets (Mylan) Etoricoxib 90mg Tablet Oral  
 Naproxen 375mg gastro-resistant tablets (Actavis UK Ltd) Naproxen 375mg Gastro-  
 81765 resistant tablet Oral  
 Naproxen 375mg gastro-resistant tablets (Alliance Healthcare (Distribution)  
 81769 Ltd) Naproxen 375mg Gastro-resistant tablet Oral  
 Naproxen 375mg gastro-resistant tablets (DE  
 81770 Pharmaceuticals) Naproxen 375mg Gastro-resistant tablet Oral  
 Naproxen 375mg gastro-resistant tablets (A A H Pharmaceuticals  
 81771 Ltd) Naproxen 375mg Gastro-resistant tablet Oral  
 Diclo-SR 75mg tablets (Strides Pharma UK Ltd) Diclofenac sodium 75mg Modified-  
 81801 release tablet Oral  
 81837 Arcoxia 90mg tablets (CST Pharma Ltd) Etoricoxib 90mg Tablet Oral  
 82104 Naproxen 500mg tablets (Bristol Laboratories Ltd) Naproxen 500mg Tablet Oral  
 82137 Ibuprofen 400mg tablets (Wockhardt UK Ltd) Ibuprofen 400mg Tablet Oral  
 82181 Etoricoxib 60mg tablets (Mylan) Etoricoxib 60mg Tablet Oral  
 82301 Arcoxia 90mg tablets (Necessity Supplies Ltd) Etoricoxib 90mg Tablet Oral  
 Naproxen 375mg gastro-resistant tablets (Sigma Pharmaceuticals  
 82347 Plc) Naproxen 375mg Gastro-resistant tablet Oral  
  
 82354 Feldene Melt 20mg tablets (Lexon (UK) Ltd) Piroxicam 20mg Orodispersible tablet Oral  
 Etodolac 600mg modified-release tablets (Zentiva) Etodolac 600mg Modified-release  
 82373 tablet Oral  
 82426 Arcoxia 30mg tablets (Waymade Healthcare Plc) Etoricoxib 30mg Tablet Oral  
 82428 Arcoxia 120mg tablets (Lexon (UK) Ltd) Etoricoxib 120mg Tablet Oral  
 Brufen Retard 800mg tablets (Waymade Healthcare Plc) Ibuprofen 800mg Modified-  
 82503 release tablet Oral  
 Voltarol 75mg SR tablets (Dowelhurst Ltd) Diclofenac sodium 75mg Modified-release  
 82517 tablet Oral  
 Arthrotec 75 gastro-resistant tablets (Waymade Healthcare Plc) Diclofenac  
 82550 sodium/Misoprostol 75mg + 200microgram Gastro-resistant tablet Oral

Diclofenac potassium 50mg tablets (Medihealth (Northern) Ltd)Diclofenac  
82690 potassium50mgTabletOral  
82721 Flurbiprofen 100mg tablets (Mylan)Flurbiprofen100mgTabletOral  
82737 Diclofenac sodium 25mg capsulesDiclofenac Sodium  
82815 Ibuprofen 200mg tablets (Noumed Life Sciences Ltd)Ibuprofen200mgTabletOral

Colchicine

**DRUG\_CODE** DESCRIPTION

8643 COLCHICINE .5 MG TAB  
12086 COLCHICINE 250 MCG CAP

77032 Colchicine 500microgram tablets (Teva UK Ltd) Colchicine 500microgram Tablet Oral  
Colchicine 400micrograms/5ml oral suspension Colchicine 80microgram/1ml Oral  
76421 suspension Oral  
Colchicine 500microgram tablets (Wockhardt UK Ltd) Colchicine 500microgram  
34469 Tablet Oral  
Colchicine 500microgram tablets (UCB Pharma Ltd) Colchicine 500microgram Tablet  
34329 Oral  
66679 PROBENECID/COLCHICINE 500 MG TAB  
Colchicine 500microgram tablets (DE Pharmaceuticals) Colchicine 500microgram  
71853 Tablet Oral  
762 Colchicine 500microgram tablets Colchicine 500microgram Tablet Oral  
Colchicine 500microgram tablets (A A H Pharmaceuticals Ltd) Colchicine  
46962 500microgram Tablet Oral  
357 COLCHICINE 250 MCG TAB  
Colchicine 500microgram tablets (Alliance Healthcare (Distribution) Ltd) Colchicine  
66469 500microgram Tablet Oral  
29961 COLCHICUM & SODIUM SALICYLATE MIX  
Colchicine 500microgram tablets (Kent Pharmaceuticals Ltd) Colchicine  
71052 500microgram Tablet Oral  
21063 COLCHICINE .1 MG TAB  
80866 COLCHICINE 300 MCG TAB

## Urate lowering therapy

### DRUG\_CODE\_DESCRIPTION

34005 Allopurinol 300mg tablets (Teva UK Ltd) Allopurinol 300mg Tablet Oral  
41612 Allopurinol 300mg tablets (Actavis UK Ltd) Allopurinol 300mg Tablet Oral  
Allopurinol 300mg/5ml oral suspension Allopurinol 60mg/1ml Oral suspension  
54139 Oral  
23368 Hamarin 100 Tablet (Nicholas Laboratories Ltd) Allopurinol 100mg Tablet Oral  
46941 Allopurinol 300mg Tablet (Lagap) Allopurinol 300mg Tablet Oral  
  
44239 Cosuric 100mg Tablet (DDSA Pharmaceuticals Ltd) Allopurinol 100mg Tablet Oral  
  
368 Zyloric 100mg tablets (Aspen Pharma Trading Ltd) Allopurinol 100mg Tablet Oral  
67347 Allopurinol 300mg/5ml oral solution Allopurinol 60mg/1ml Oral solution Oral  
Xanthomax 300 tablets (Ashbourne Pharmaceuticals Ltd) Allopurinol 300mg Tablet  
19037 Oral  
Allopurinol 300mg tablets (Almus Pharmaceuticals Ltd) Allopurinol 300mg Tablet  
64906 Oral  
Adenuric 80mg tablets (A. Menarini Farmaceutica Internazionale SRL) Febuxostat  
42859 80mg Tablet Oral  
Allopurinol 300mg tablets (IVAX Pharmaceuticals UK Ltd) Allopurinol 300mg Tablet  
41520 Oral  
34566 Allopurinol 300mg tablets (Mylan) Allopurinol 300mg Tablet Oral  
Adenuric 120mg tablets (A. Menarini Farmaceutica Internazionale SRL) Febuxostat  
43336 120mg Tablet Oral  
Allopurinol 300mg tablets (Alliance Healthcare (Distribution) Ltd) Allopurinol  
67256 300mg Tablet Oral  
  
72223 Allopurinol 300mg tablets (Crescent Pharma Ltd) Allopurinol 300mg Tablet Oral  
34711 Allopurinol 100mg tablets (Mylan) Allopurinol 100mg Tablet Oral  
  
44240 Cosuric 300mg Tablet (DDSA Pharmaceuticals Ltd) Allopurinol 300mg Tablet Oral  
24215 Caplenal 100mg tablets (Teva UK Ltd) Allopurinol 100mg Tablet Oral  
Allopurinol 100mg tablets (Almus Pharmaceuticals Ltd) Allopurinol 100mg Tablet  
67748 Oral  
34930 Allopurinol 100mg tablets (Wockhardt UK Ltd) Allopurinol 100mg Tablet Oral  
Allopurinol 300mg Tablet (Celltech Pharma Europe Ltd) Allopurinol 300mg Tablet  
76616 Oral  
Allopurinol 100mg tablets (A A H Pharmaceuticals Ltd) Allopurinol 100mg Tablet  
30768 Oral  
57739 Allopurinol 100mg/5ml oral solution Allopurinol 20mg/1ml Oral solution Oral  
Allopurinol 100mg tablets (IVAX Pharmaceuticals UK Ltd) Allopurinol 100mg Tablet  
19201 Oral  
33484 Allopurinol 100mg tablets (Actavis UK Ltd) Allopurinol 100mg Tablet Oral  
34947 Allopurinol 100mg Tablet (Lagap) Allopurinol 100mg Tablet Oral  
Allopurinol 200mg/5ml oral suspension Allopurinol 40mg/1ml Oral suspension  
65820 Oral  
71008 Allopurinol 100mg tablets (Milpharm Ltd) Allopurinol 100mg Tablet Oral  
41541 Allopurinol 100mg tablets (Teva UK Ltd) Allopurinol 100mg Tablet Oral  
76 Allopurinol 300mg tablets Allopurinol 300mg Tablet Oral

74645 Allopurinol 300mg Tablet (Regent Laboratories Ltd) Allopurinol 300mg Tablet Oral  
Allopurinol 300mg tablets (A A H Pharmaceuticals Ltd) Allopurinol 300mg Tablet  
34278 Oral

78470 Allopurinol 300mg tablets (Bristol Laboratories Ltd) Allopurinol 300mg Tablet Oral

78713 Allopurinol 50mg/5ml oral suspension Allopurinol 10mg/1ml Oral suspension Oral

77467 Zyloric 100mg tablets (Lexon (UK) Ltd) Allopurinol 100mg Tablet Oral

34573 Allopurinol 300mg tablets (Wockhardt UK Ltd) Allopurinol 300mg Tablet Oral

Allopurinol 100mg/5ml sugar free oral suspension Allopurinol 100mg/5ml

11975 Suspension Sugar-Free Oral

68025 Allopurinol 100mg tablets (DE Pharmaceuticals) Allopurinol 100mg Tablet Oral

76324 Allopurinol 100mg tablets (Accord Healthcare Ltd) Allopurinol 100mg Tablet Oral

7805 Zyloric 300mg tablets (Aspen Pharma Trading Ltd) Allopurinol 300mg Tablet Oral

42536 Febuxostat 80mg tablets Febuxostat 80mg Tablet Oral

413 Allopurinol 100mg tablets Allopurinol 100mg Tablet Oral

Allopurinol 100mg Tablet (Celltech Pharma Europe Ltd) Allopurinol 100mg Tablet

41664 Oral

71717 Uricto 300mg tablets (Ennogen Pharma Ltd) Allopurinol 300mg Tablet Oral

78521 Allopurinol 300mg tablets (Accord Healthcare Ltd) Allopurinol 300mg Tablet Oral

Xanthomax 100 tablets (Ashbourne Pharmaceuticals Ltd) Allopurinol 100mg Tablet

5182 Oral

17255 Hamarin 300 Tablet (Roche Products Ltd) Allopurinol 300mg Tablet Oral

Allopurinol 100mg tablets (Waymade Healthcare Plc) Allopurinol 100mg Tablet

72153 Oral

45352 Allopurinol 300mg tablets (Ranbaxy (UK) Ltd) Allopurinol 300mg Tablet Oral

13467 Caplenal 300mg tablets (Teva UK Ltd) Allopurinol 300mg Tablet Oral

Allopurinol 100mg/5ml oral suspension Allopurinol 20mg/1ml Oral suspension

52409 Oral

43161 Febuxostat 120mg tablets Febuxostat 120mg Tablet Oral

**Oral diuretics**

DRUG\_CODE\_

17462

33837

60020

66517

64907

1288

60780

38995

12651

25965

5728

40247

27447

26217

47616

3293

21182

57488

64066

18903

78257

78262

7543

19258

43915

67664

38964

1211

13246

47647

10627

2982

9143

21231

59030

4068

31013

3997

24190

9456

11133

57610

31820

21849

77681

5721

20538

34374

30773

12318

22923

38882

8836

2811

76323

1369

27489



62249  
7799  
39447

8058  
6  
29583

60620

11864

59884

3056

4983  
26529

47573  
43523  
30272  
55

43508

11338

45916

72086  
58

41828

25382  
27664  
43516

26219

11526

33724

3050

34449

67780

13352

31773

9223

24268

19683

71682

8558

9680

74800

22525

7066

77386

3691

66149

7351

56975

34006

46675

39021

25625

23486

24693

23382

21423

19056

46952

35162

6786

29529

74172

4406

12546

64677

57908

12054

24702

793

76840

74942

30592

52887

23456

60258

1125

16632

4044

55399

47844

21848

2612

9374

33353

2772

30129

14126

24189

20785

49268

55259

41556

50607

77449

28738

22004

23134

31932

61365

56244

48099

4034

42488

51258

542

18716

11469

74017

64798

4332

31548

72914

31150

12313

38634

66997

77466

30519

3203

19352

2255

8673

60465

33415

52900

27689

66017

923

3285

19892

71950

13871

47804

41897

42142

24632

24280

2979

56375

37294

30625

40190

21867

54679

4796

9431

47727

25505

29634

69445

2002

54341

35380

6877

37400

4211

3902

46302

20426

38831

20779

20513

23131

1301

39807

46687

77641

55358

27946

37710

19192

7618

8987

19015

77850

62207

16060

25764

14057  
24832  
14387  
605  
23271  
53812  
  
24484  
  
53508  
  
31470  
814  
  
4852  
  
2046  
  
39137  
  
34622  
  
581  
58224  
  
25730  
61846  
  
6437  
  
48039  
13525  
51983  
76157  
44168  
25334  
  
17960  
  
40149  
  
66598  
  
32094  
34557  
  
32277  
  
9178  
25462

12926  
49752  
77387

37747

72042

3793  
15493  
12294  
1209

14837  
562  
3054  
59834

38865

52858

6794  
1170

69277

18497

14587

72083  
8602

52189

33527

9764

18726

30875

3526

1721

764  
26328



22539  
23256

67801

5218  
41405

18332

46116  
25051

12226

69108

71115  
67910  
45305

18287  
2833

6309  
34551  
34750

18200  
69334

15341  
7698

10422

26741

1124

26248

10267

62911

40886

31375  
19687

52045

56  
74153

12517

42388

62771

8102

77406

16786

8897

37978  
30035

37650

2493  
71406

20066  
29696

8189  
4334

18743

26220

8521

78229  
2681

5868  
15457

1213  
30368  
19194  
46525

39227

8061

78374

34012

32896

31670

18096

75957

71377

17655

19055

74926

38367

7806

15577

7888

4873

15031

74040

1776

26120

32918

19890

13435

34034

76165

34803

34825

75260

14438

55160

62537

71618

65636

16161

21025

52145

33659

32002

62066

48132

24741

7709

27696

17149

18983

9211

78220

62376

35481

4429

40898

5727

65602

3517

48745

16701

31131

8052

7961

23505

21938  
19695  
34934

5220

46792  
77333

48098

56760

21346

193  
27556  
13472

39147

60007

12547  
29976

15042

14870

78488  
64255  
55050  
36767  
60603

41885

22839  
73152

28177

7734

6359

24893

67767

17252

41861

34613

34059

16498

18244

65504

57600

26256

26275

73441

55777

63237

47467

41889

79677

3287

60149

17720

73480

34124

348

25717

79798

33658

18650

8891

71871

52276

25075

70509

1297  
28157  
18267

53220

75069

211  
27555

35196  
21803

18263  
74677  
23483  
36190  
30367

41572

34602

10882  
30365  
46930

77457  
18973

15874  
39602  
54643

41719

17689

73337  
16206  
76934  
11351

1021

76920

38855

19142

56157

46916

56051

39242

15127

53674

7136

27926

78441

74215

12360

46948

1520

55548

2179

5330

13526

26807

48870

41517

68068

2

78728

37725

71748

2001

67737

924



30034  
8303

70922  
25630

38459  
46699

5189  
26675

11384

74874

29427

56204

14228

8147  
74381

36519  
64745

11561

4661  
7625  
54825  
66195  
12354

11265

15108

38632  
6816  
79904  
25787

18202  
63227

37908  
2495

1788

8464

20093

4540

20057

11487

22912

10902

2961

2788

34280

59616

12440

29780

63890

30913

46715

69338

27256

58078

77162

17561

4705

12110

40738

32166

73171

11448

28129

517

62337

11268

3962

60354

6160

54329

68432

33651

6118

38889

9783

9935

73993

24835

57539

49529

40907

62024

65583

77566

18606

59939

56804

70989

24520

19611

19721

3118

7441

25363

12367

73195

59911

59412

7740

47815

15135

26292

79368

32091

44254

3248

56296

14738

12456

3701

27690

7606

59290

31235

10066

8369

31708

77414

4258

25500

62700

63555

34367

21873

18361

14283  
17143

6468

19300  
55889  
61475  
29991

70754

5416

55738  
34324  
14761

38818  
5249

10323

15488

78265

74008

27520

34899

13363

4605  
22658  
3548

78887  
10392

7582

8623

23427

67738

75855

5112

70650

20431

60291

46355

10781

53967

4182

75383

76031

42906

23492

43184

9240

7641

62516

41292

1060

8526

74814

48079

11641

80095

71348

69009

15811

26731

18733

24008

54316

22242

1251

33083

10316  
41533  
41630  
54201  
57796  
38901  
27957  
43322  
81319  
81326  
81555  
81590  
81633  
81641  
81668  
81772  
82036  
82312  
82319  
82328  
82330  
82378  
82413  
82488  
82490  
82505

82567  
82639  
82828



## DESCRIPTION

Bisoprolol 10mg / Hydrochlorothiazide 6.25mg tablets Bisoprolol fumarate/Hydrochlorothiazide 10mg + 6.25mg Tablet Oral

Amiloride 5mg tablets (A A H Pharmaceuticals Ltd) Amiloride hydrochloride 5mg Tablet Oral

Indapamide 1.5mg modified-release tablets (Waymade Healthcare Plc) Indapamide 1.5mg Modified-release tablet Oral

Bendroflumethiazide 1.25mg/5ml oral suspension Bendroflumethiazide 250microgram/1ml Oral suspension Oral

Bendroflumethiazide 5mg tablets (Almus Pharmaceuticals Ltd) Bendroflumethiazide 5mg Tablet Oral

Tenoret 50mg/12.5mg tablets (AstraZeneca UK Ltd) Atenolol/Chlortalidone 50mg + 12.5mg Tablet Oral

Generic Sevikar HCT 20mg/5mg/12.5mg tablets Hydrochlorothiazide/Amlodipine besilate/Olmesartan medoxomil 12.5mg + 5mg + 20mg Tablet Oral

Zestoretic 20 tablets (AstraZeneca UK Ltd) Lisinopril/Hydrochlorothiazide 20mg + 12.5mg Tablet Oral

Timolol 10mg / Bendroflumethiazide 2.5mg tablets Timolol maleate/Bendroflumethiazide 10mg + 2.5mg Tablet Oral

Co-amilofruse 2.5mg/20mg tablets (Wockhardt UK Ltd) Amiloride hydrochloride/Furosemide 2.5mg + 20mg Tablet Oral

Furosemide 40mg/5ml oral solution sugar free Furosemide 8mg/1ml Oral solution Gastroenteral/Oral

Furosemide 10mg/ml Injection (Martindale Pharmaceuticals Ltd) Furosemide 10mg/ml Injection Intravenous Injection

Furosemide 40mg tablets (Wockhardt UK Ltd) Furosemide 40mg Tablet Oral

Berkamil 5mg Tablet (Berk Pharmaceuticals Ltd) Amiloride hydrochloride 5mg Tablet Oral

Sevikar HCT 40mg/10mg/12.5mg tablets (Daiichi Sankyo UK Ltd)

Hydrochlorothiazide/Olmesartan medoxomil/Amlodipine besilate 12.5mg + 40mg + 10mg Tablet Oral

Moduretic Oral solution (Bristol-Myers Squibb Pharmaceuticals Ltd) Amiloride Hydrochloride/Hydrochlorothiazide Oral Solution Oral

Hydrochlorothiazide with timolol and amiloride 25mg with 10mg with 2.5mg Tablet Amiloride

Hydrochloride/Hydrochlorothiazide/Timolol Maleate 25mg + 10mg + 2.5mg Tablet Oral

Hydrochlorothiazide Oral solution Hydrochlorothiazide Oral Solution

Indapamide 2.5mg/5ml oral suspension Indapamide 500microgram/1ml Oral suspension Oral

Olmesartan medoxomil 20mg / Hydrochlorothiazide 25mg tablets

Hydrochlorothiazide/Olmesartan medoxomil 25mg + 20mg Tablet Oral

Furosemide 80mg/5ml oral suspension Furosemide 16mg/1ml Oral suspension Oral

Lisinopril 10mg / Hydrochlorothiazide 12.5mg tablets (Waymade Healthcare Plc)

Lisinopril/Hydrochlorothiazide 10mg + 12.5mg Tablet Oral

Kalten capsules (M & A Pharmachem Ltd) Atenolol/Amiloride hydrochloride/Hydrochlorothiazide 50mg + 2.5mg + 25mg Capsule Oral

Furosemide 50mg/5ml solution for injection ampoules Furosemide 10mg/1ml Solution for injection Intravenous/Intramuscular

Olmotec Plus 40mg/12.5mg tablets (Daiichi Sankyo UK Ltd) Olmesartan medoxomil/Hydrochlorothiazide 40mg + 12.5mg Tablet Oral

Valsartan 160mg / Hydrochlorothiazide 12.5mg tablets (Teva UK Ltd)  
Valsartan/Hydrochlorothiazide 160mg + 12.5mg Tablet Oral  
Adizem-SR 120mg tablets (Napp Pharmaceuticals Ltd) Diltiazem hydrochloride 120mg Modified-release tablet Oral

Bendroflumethiazide 2.5mg / Potassium chloride 630mg (potassium 8.4mmol) modified-release tablets Potassium chloride/Bendroflumethiazide 630mg + 2.5mg Modified-release tablet Oral  
Chlorothiazide 150mg/5ml oral suspension Chlorothiazide 30mg/1ml Oral suspension Oral  
Co-amilofruse oral liquid Amiloride Hydrochloride/Furosemide Oral Liquid Oral  
Co-Betaloc tablets (Pfizer Ltd) Metoprolol tartrate/Hydrochlorothiazide 100mg + 12.5mg Tablet Oral

Zestoretic 20- 20mg+12.5mg Tablet (AstraZeneca UK Ltd) Lisinopril/Hydrochlorothiazide 20mg + 12.5mg Tablet Oral

Viskaldix tablets (Advanz Pharma) Pindolol/Clopamide 10mg + 5mg Tablet Oral

Caralpha 20mg/12.5mg tablets (Actavis UK Ltd) Lisinopril/Hydrochlorothiazide 20mg + 12.5mg Tablet Oral

Furosemide 20mg/5ml oral solution Furosemide 4mg/1ml Oral solution Oral

Dytac 50mg capsules (Advanz Pharma) Triamterene 50mg Capsule Oral

Mersalyl 50mg/ml Injection Mersalyl 50mg/ml Injection

Hygroton 50mg tablets (Alliance Pharmaceuticals Ltd) Chlortalidone 50mg Tablet Oral

Neo-bendromax 5mg Tablet (Ashbourne Pharmaceuticals Ltd) Bendroflumethiazide 5mg Tablet Oral

Amiloride 5mg / furosemide 40mg tablets Amiloride Hydrochloride/Furosemide 5mg + 40mg Tablets Oral

Hydrochlorothiazide with captopril 25mg with 50mg Tablet Captopril/Hydrochlorothiazide 25mg + 50mg Tablet Oral

Furosemide 20mg/5ml oral solution sugar free (Advanz Pharma) Furosemide 4mg/1ml Oral solution Oral

Bendroflumethiazide 5mg tablets (Wockhardt UK Ltd) Bendroflumethiazide 5mg Tablet Oral

Dryptal 40mg Tablet (Berk Pharmaceuticals Ltd) Furosemide 40mg Tablet Oral

Bendroflumethiazide 5mg tablets (Mylan) Bendroflumethiazide 5mg Tablet Oral

Co-tenidone 100mg/25mg tablets Atenolol/Chlortalidone 100mg + 25mg Tablet Oral

Frumax 40mg Tablet (Ashbourne Pharmaceuticals Ltd) Furosemide 40mg Tablet Oral

Furosemide 40mg tablets (Teva UK Ltd) Furosemide 40mg Tablet Oral

Co-amilofruse 5mg+40mg Tablet (Berk Pharmaceuticals Ltd) Amiloride hydrochloride/Furosemide 5mg + 40mg Tablet Oral

Lasix 250mg/25ml Injection (Hoechst Marion Roussel) Furosemide 10mg/1ml Solution for injection Intravenous/Intramuscular

Hydrochlorothiazide with amiloride 50mg with 5mg Tablet Amiloride

Hydrochloride/Hydrochlorothiazide 50mg + 5mg Tablet Oral

Adizem-XL 240mg capsules (Napp Pharmaceuticals Ltd) Diltiazem hydrochloride 240mg Modified-release capsule Oral

Chlorothiazide 500mg tablets Chlorothiazide 500mg Tablets Oral

Adizem sr 180mg Modified-release capsule (Napp Pharmaceuticals Ltd) Diltiazem Hydrochloride 180mg Modified-Release Capsule Oral

Furosemide 40mg tablets (Crescent Pharma Ltd) Furosemide 40mg Tablet Oral

Furosemide with amiloride 40mg+5mg Tablet Amiloride Hydrochloride/Furosemide 40mg+5mg Tablet Oral

CHLOROTHIAZIDE 25 MG LIQ

Co-amilozide 5mg/50mg tablets (Alliance Healthcare (Distribution) Ltd) Amiloride hydrochloride/Hydrochlorothiazide 5mg + 50mg Tablet Oral  
Lasix 20mg tablets (Borg Medicare) Furosemide 20mg Tablet Oral  
Varbim XL 1.5mg tablets (Teva UK Ltd) Indapamide 1.5mg Modified-release tablet Oral  
Normetic Tablet (Abbott Laboratories Ltd) Amiloride hydrochloride/Hydrochlorothiazide 5mg + 50mg Tablet Oral  
Furosemide 40mg tablets Furosemide 40mg Tablet Oral  
MIN-I-JET 100MG FRUSEMIDE INJ INJ  
Adizem-XL 240mg capsules (Waymade Healthcare Plc) Diltiazem hydrochloride 240mg Modified-release capsule Oral  
Valsartan 160mg / Hydrochlorothiazide 12.5mg tablets Valsartan/Hydrochlorothiazide 160mg + 12.5mg Tablet Oral

Furosemide 20mg tablets (Phoenix Healthcare Distribution Ltd) Furosemide 20mg Tablet Oral  
NatriliX SR 1.5mg tablets (Servier Laboratories Ltd) Indapamide 1.5mg Modified-release tablet Oral

Atenolol with amiloride and hydrochlorothiazide capsules Amiloride Hydrochloride/Atenolol/Hydrochlorothiazide Capsules Oral  
Furosemide with penbutolol Tablet Furosemide/Penbutolol Tablet Oral

Sevikar HCT 40mg/5mg/12.5mg tablets (Daiichi Sankyo UK Ltd) Hydrochlorothiazide/Amlodipine besilate/Olmesartan medoxomil 12.5mg + 5mg + 40mg Tablet Oral  
Amiloride 5mg tablets (Mylan) Amiloride hydrochloride 5mg Tablet Oral  
Benthiazide with Triamterene capsules Triamterene/Benzthiazide Capsules Oral  
Furosemide 20mg tablets Furosemide 20mg Tablet Oral  
Co-amilofruse 5mg/40mg tablets (Sandoz Ltd) Amiloride hydrochloride/Furosemide 5mg + 40mg Tablet Oral

Bendroflumethiazide 5mg with Nadolol 40mg tablets Bendroflumethiazide/Nadolol 5mg + 40mg Tablets Oral

Hydroflumethiazide with spironolactone 50mg+50mg Tablet Spironolactone/Hydroflumethiazide 50mg+50mg Tablet Oral

Valsartan 160mg / Hydrochlorothiazide 12.5mg tablets (Actavis UK Ltd)

Valsartan/Hydrochlorothiazide 160mg + 12.5mg Tablet Oral

Bendroflumethiazide 5mg tablets Bendroflumethiazide 5mg Tablet Oral

Furosemide 500mg tablets (Accord Healthcare Ltd) Furosemide 500mg Tablet Oral

Co-Diovan 160mg/25mg tablets (Novartis Pharmaceuticals UK Ltd)

Valsartan/Hydrochlorothiazide 160mg + 25mg Tablet Oral

FRUSEMIDE PAED

Indapamide 2.5mg tablets (Actavis UK Ltd) Indapamide hemihydrate 2.5mg Tablet Oral

Zida-co 5mg+50mg Tablet (Opus Pharmaceuticals Ltd) Amiloride

hydrochloride/Hydrochlorothiazide 5mg + 50mg Tablet Oral

CoAprovel 300mg/12.5mg tablets (Sanofi) Irbesartan/Hydrochlorothiazide 300mg + 12.5mg Tablet Oral

Diuril 250mg/5ml oral suspension (Imported (United States)) Chlorothiazide 50mg/1ml Oral suspension Oral

Furosemide with triamterene 40mgwith50mg Tablet Furosemide/Triamterene 40mg + 50mg Tablet Oral

Co-tenidone 50mg/12.5mg tablets (Mylan) Atenolol/Chlortalidone 50mg + 12.5mg Tablet Oral

Bendroflumethiazide 5mg tablets (DE Pharmaceuticals) Bendroflumethiazide 5mg Tablet Oral  
Midamor 5mg Tablet (MSD Thomas Morson Pharmaceuticals) Amiloride hydrochloride 5mg  
Tablet Oral  
Co-amilofruse 5mg/40mg tablets (Wockhardt UK Ltd) Amiloride hydrochloride/Furosemide 5mg  
+ 40mg Tablet Oral  
Triamterene with hydrochlorothiazide 50mg + 25mg Tablet Hydrochlorothiazide/Triamterene  
50mg + 25mg Tablet Oral  
Hydrochlorothiazide with valsartan 12.5mg with 80mg Tablet Hydrochlorothiazide/Valsartan  
12.5mg + 80mg Tablet Oral  
BURINEX K  
Losartan 100mg / Hydrochlorothiazide 25mg tablets (Mawdsley-Brooks & Company Ltd) Losartan  
potassium/Hydrochlorothiazide 100mg + 25mg Tablet Oral  
Adizem xl 120mg Capsule (Napp Pharmaceuticals Ltd) Diltiazem Hydrochloride 120mg Capsule  
Oral  
Frusol 40mg/5ml oral solution (Rosemont Pharmaceuticals Ltd) Furosemide 8mg/1ml Oral  
solution Gastroenteral/Oral  
Frumil 40mg/5mg tablets (Lexon (UK) Ltd) Amiloride hydrochloride/Furosemide 5mg + 40mg  
Tablet Oral  
CHLOROTHIAZIDE 250 MG SYR  
Metoprolol 100mg / Hydrochlorothiazide 12.5mg tablets Metoprolol  
tartrate/Hydrochlorothiazide 100mg + 12.5mg Tablet Oral  
Dyazide 50mg/25mg tablets (Dowelhurst Ltd) Triamterene/Hydrochlorothiazide 50mg + 25mg  
Tablet Oral  
Sotalol 160mg with hydrochlorothiazide 25mg tablet Hydrochlorothiazide/Sotalol Hydrochloride  
160mg + 25mg Tablets Oral  
Furosemide 4.5mg/5ml oral solution Furosemide 900microgram/1ml Oral solution Oral  
Bendroflumethiazide 2.5mg/5ml oral suspension Bendroflumethiazide 500microgram/1ml Oral  
suspension Oral  
Losartan 50mg / Hydrochlorothiazide 12.5mg tablets (A A H Pharmaceuticals Ltd) Losartan  
potassium/Hydrochlorothiazide 50mg + 12.5mg Tablet Oral  
Furosemide 40mg tablets (Actavis UK Ltd) Furosemide 40mg Tablet Oral  
Indapamide 1.5mg modified-release tablets (A A H Pharmaceuticals Ltd) Indapamide 1.5mg  
Modified-release tablet Oral  
Hydrochlorothiazide with olmesartan medoxomil 25mg with 20mg tablet  
Hydrochlorothiazide/Olmesartan Medoxomil 25mg + 20mg Tablet Oral  
FRUSEMIDE 40mg/8MMOL POTASSIUM S/R  
FRUSEMIDE 40mg/10MMOL POTASSIUM S/R  
CARACE (SPECIAL COMPLIANCE PACK)  
CARACE (SPECIAL COMPLIANCE PACK)  
Cozaar-Comp 100mg/25mg tablets (Merck Sharp & Dohme Ltd) Losartan  
potassium/Hydrochlorothiazide 100mg + 25mg Tablet Oral  
Furosemide 50mg/5ml sugar free Oral solution (Rosemont Pharmaceuticals Ltd) Furosemide  
10mg/1ml Oral solution Oral  
Co-tenidone 100mg/25mg tablets (Actavis UK Ltd) Atenolol/Chlortalidone 100mg + 25mg Tablet  
Oral  
Furosemide 20mg/2ml solution for injection ampoules Furosemide 10mg/1ml Solution for  
injection Intravenous/Intramuscular  
Lisinopril 10mg / Hydrochlorothiazide 12.5mg tablets Lisinopril/Hydrochlorothiazide 10mg +  
12.5mg Tablet Oral

Hydroflumethiazide with spironolactone 25mg+25mg Tablet Spironolactone/Hydroflumethiazide 25mg+25mg Tablet Oral  
Indapamide 1.5mg modified-release tablets (Sigma Pharmaceuticals Plc) Indapamide 1.5mg Modified-release tablet Oral

Decaserpyl plus Tablet (Roussel Laboratories Ltd) Benzthiazide/Methoserpidine Tablet Oral  
Kalspare Tablet (Dominion Pharma) Chlortalidone/Triamterene 50mg + 50mg Tablet Oral  
Furosemide 40mg tablets (DE Pharmaceuticals) Furosemide 40mg Tablet Oral  
Co-amilofruse 5mg/40mg tablets (Kent Pharmaceuticals Ltd) Amiloride hydrochloride/Furosemide 5mg + 40mg Tablet Oral  
Propranolol 80mg / Bendroflumethiazide 2.5mg capsules Propranolol hydrochloride/Bendroflumethiazide 80mg + 2.5mg Capsule Oral  
FRUSEMIDE

Adizem xl 240mg Capsule (Napp Pharmaceuticals Ltd) Diltiazem hydrochloride 240mg Modified-release capsule Oral

Actelsar HCT 40mg/12.5mg tablets (Actavis UK Ltd) Telmisartan/Hydrochlorothiazide 40mg + 12.5mg Tablet Oral

Chlortalidone 50mg/5ml oral suspension Chlortalidone 10mg/1ml Oral suspension Oral

CHLOROTHIAZIDE / SPIRONOLACTONE / GLUCOS 60 MG POW

Furosemide 20mg/2ml solution for injection ampoules (A A H Pharmaceuticals Ltd) Furosemide 10mg/1ml Solution for injection Intravenous/Intramuscular

Hydrochlorothiazide with valsartan 25mg with 160mg Tablet Hydrochlorothiazide/Valsartan 25mg + 160mg Tablet Oral

Co-amilofruse 2.5mg/20mg tablets (Milpharm Ltd) Amiloride hydrochloride/Furosemide 2.5mg + 20mg Tablet Oral

Navidrex -k Tablet (Novartis Pharmaceuticals UK Ltd) Potassium Chloride/Cyclopentiazide Tablet Oral

Hydrosaluric 50mg tablets (Merck Sharp & Dohme Ltd) Hydrochlorothiazide 50mg Tablet Oral

Diurexan 20mg tablets (Mylan) Xipamide 20mg Tablet Oral

Lisinopril 20mg / Hydrochlorothiazide 12.5mg tablets (A A H Pharmaceuticals Ltd)

Lisinopril/Hydrochlorothiazide 20mg + 12.5mg Tablet Oral

Bendroflumethiazide 2.5mg tablets (Kent Pharmaceuticals Ltd) Bendroflumethiazide 2.5mg Tablet Oral

AMILOSPARE 5 MG TAB

Indapamide 2.5mg tablets Indapamide hemihydrate 2.5mg Tablet Oral

Adizem 60mg Modified-release tablet (Napp Pharmaceuticals Ltd) Diltiazem hydrochloride 60mg Modified-release tablet Oral

Lisinopril 20mg / Hydrochlorothiazide 12.5mg tablets (Teva UK Ltd)

Lisinopril/Hydrochlorothiazide 20mg + 12.5mg Tablet Oral

Lasoride 5mg/40mg tablets (Sanofi) Amiloride hydrochloride/Furosemide 5mg + 40mg Tablet Oral

Abicol Tablet (Knoll Ltd) Bendroflumethiazide/Reserpine Tablet Oral

Acebutolol 200mg / Hydrochlorothiazide 12.5mg tablets Acebutolol hydrochloride/Hydrochlorothiazide 200mg + 12.5mg Tablet Oral

Neo-bendromax 2.5mg Tablet (Ashbourne Pharmaceuticals Ltd) Bendroflumethiazide 2.5mg Tablet Oral

FRUMIL

Furosemide 50mg/5ml oral suspension Furosemide 10mg/1ml Oral suspension Oral

Indapamide 2.5mg tablets (Kent Pharmaceuticals Ltd) Indapamide hemihydrate 2.5mg Tablet Oral

Co-amilozone 5mg/50mg tablets (Teva UK Ltd) Amiloride hydrochloride/Hydrochlorothiazide 5mg + 50mg Tablet Oral

Perindopril arginine 2mg with Indapamide 625 micrograms tablet Indapamide/Perindopril Erbumine

Natrilix SR 1.5mg tablets (Waymade Healthcare Plc) Indapamide 1.5mg Modified-release tablet Oral

Methyldopa with hydrochlorothiazide Tablet Hydrochlorothiazide/Methyldopa Anhydrous Tablet Oral

CARACE (SPECIAL COMPLIANCE PACK)

Nadolol 40mg / Bendroflumethiazide 5mg tablets Nadolol/Bendroflumethiazide 40mg + 5mg Tablet Oral

Bumetanide 1mg tablets (C P Pharmaceuticals Ltd) Bumetanide 1mg Tablet Oral

Furosemide 40mg/5ml oral suspension Furosemide 8mg/1ml Oral suspension Oral

Lisinopril 20mg / Hydrochlorothiazide 12.5mg tablets (Tillomed Laboratories Ltd)

Lisinopril/Hydrochlorothiazide 20mg + 12.5mg Tablet Oral

Indapamide 2.5mg tablets (A A H Pharmaceuticals Ltd) Indapamide hemihydrate 2.5mg Tablet Oral

Amiloride 5mg / hydrochlorothiazide 50mg/5ml solution Amiloride Hydrochloride/Hydrochlorothiazide 5mg + 50mg/5ml Solution Oral

Furosemide 40mg/5ml oral solution sugar free (A A H Pharmaceuticals Ltd) Furosemide 8mg/1ml Oral solution Gastroenteral/Oral

Coversyl Arginine Plus 5mg/1.25mg tablets (DE Pharmaceuticals) Perindopril arginine/Indapamide 5mg + 1.25mg Tablet Oral

Hydrochlorothiazide 25mg tablets Hydrochlorothiazide 25mg Tablet Oral

Dryptal 10mg/ml Injection (Berk Pharmaceuticals Ltd) Furosemide 10mg/ml Injection

Irbesartan 300mg / Hydrochlorothiazide 12.5mg tablets Irbesartan/Hydrochlorothiazide 300mg + 12.5mg Tablet Oral

Moduretic 5mg/50mg tablets (Waymade Healthcare Plc) Amiloride hydrochloride/Hydrochlorothiazide 5mg + 50mg Tablet Oral

Chlorothiazide 120mg/5ml oral solution Chlorothiazide 24mg/1ml Oral solution Oral

Metolazone 5mg tablets Metolazone 5mg Tablet Oral

Furosemide 20mg tablets (Actavis UK Ltd) Furosemide 20mg Tablet Oral

Bendroflumethiazide 2.5mg Tablet (Celltech Pharma Europe Ltd) Bendroflumethiazide 2.5mg Tablet Oral

Co-amilozone 5mg/50mg tablets (IVAX Pharmaceuticals UK Ltd) Amiloride hydrochloride/Hydrochlorothiazide 5mg + 50mg Tablet Oral

Carace 20mg tablets (Bristol-Myers Squibb Pharmaceuticals Ltd) Lisinopril 20mg Tablet Oral

Adizem-XL 300mg capsules (Napp Pharmaceuticals Ltd) Diltiazem hydrochloride 300mg Modified-release capsule Oral

MicardisPlus 40mg/12.5mg tablets (Waymade Healthcare Plc) Telmisartan/Hydrochlorothiazide 40mg + 12.5mg Tablet Oral

Co-tenidone 50mg/12.5mg tablets (Kent Pharmaceuticals Ltd) Atenolol/Chlortalidone 50mg + 12.5mg Tablet Oral

Amiloride with timolol with hydrochlorothiazide tablets Amiloride Hydrochloride/Hydrochlorothiazide/Timolol Maleate Tablets Oral

Capozide LS Tablet (E R Squibb and Sons Ltd) Hydrochlorothiazide/Captopril 12.5mg + 25mg Tablet Oral

Xuret 0.5mg Tablet (Galen Ltd) Metolazone 0.5mg Tablet Oral

Navispare 2.5mg/250microgram tablets (Advanz Pharma) Amiloride hydrochloride/Cyclopentiazide 2.5mg + 250microgram Tablet Oral

Oxprenolol with cyclopentiazide 160mg+0.25mg Modified-release tablet Oxprenolol Hydrochloride/Cyclopentiazide 160mg+0.25mg Modified-Release Tablet Oral

Furosemide 5mg/5ml oral solution Furosemide 1mg/1ml Oral solution Oral

Bendroflumethiazide 2.5mg tablets (Mylan) Bendroflumethiazide 2.5mg Tablet Oral

Furosemide 80mg/8ml solution for injection Minijet pre-filled syringes (UCB Pharma Ltd)

Furosemide 10mg/1ml Solution for injection Intravenous/Intramuscular

Bendroflumethiazide 2.5mg tablets (IVAX Pharmaceuticals UK Ltd) Bendroflumethiazide 2.5mg Tablet Oral

Furosemide 20mg tablets (Almus Pharmaceuticals Ltd) Furosemide 20mg Tablet Oral

Co-amilozide 5mg/50mg tablets Amiloride hydrochloride/Hydrochlorothiazide 5mg + 50mg Tablet Oral

AMILORIDE S/F 5 MG/5ML SOL

Serpasil -esidrex Tablet (Novartis Pharmaceuticals UK Ltd) Hydrochlorothiazide/Reserpine Tablet Oral

Furosemide 20mg tablets (Waymade Healthcare Plc) Furosemide 20mg Tablet Oral

Co-prenozide 160mg/0.25mg modified-release tablets Oxprenolol hydrochloride/Cyclopentiazide 160mg + 250microgram Modified-release tablet Oral

Co-triamterzide 50mg/25mg tablets (A A H Pharmaceuticals Ltd)

Triamterene/Hydrochlorothiazide 50mg + 25mg Tablet Oral

CO-BETALOC

Moduretic 5mg/50mg tablets (Merck Sharp & Dohme Ltd) Amiloride hydrochloride/Hydrochlorothiazide 5mg + 50mg Tablet Oral

Hydrochlorothiazide with losartan 25mg with 100mg Tablet Hydrochlorothiazide/Losartan Potassium 25mg + 100mg Tablet Oral

Totaretic 100mg+25mg Tablet (C P Pharmaceuticals Ltd) Atenolol/Chlortalidone 100mg + 25mg Tablet Oral

Centyl k Tablet (Edwin Burgess Ltd) Potassium chloride/Bendroflumethiazide 630mg + 2.5mg Modified-release tablet Oral

Furosemide 40mg tablets (Accord Healthcare Ltd) Furosemide 40mg Tablet Oral

Triamterene with chlortalidone 50mg + 25mg Tablet Chlortalidone/Triamterene 50mg + 25mg Tablet Oral

Furosemide 20mg tablets (A A H Pharmaceuticals Ltd) Furosemide 20mg Tablet Oral

Torasemide iv 20mg/4ml Intravenous injection Torasemide 20mg/4ml Intravenous Injection

Berkozide 5mg Tablet (Berk Pharmaceuticals Ltd) Bendroflumethiazide 5mg Tablet Oral

Chlorothiazide 250mg tablets Chlorothiazide 250mg Tablet Oral

Inderetic 80mg/2.5mg capsules (AstraZeneca UK Ltd) Propranolol hydrochloride/Bendroflumethiazide 80mg + 2.5mg Capsule Oral

Frusemek 40mg+5mg Tablet (Approved Prescription Services Ltd) Amiloride hydrochloride/Furosemide 5mg + 40mg Tablet Oral

Sevikar HCT 40mg/5mg/25mg tablets (Daiichi Sankyo UK Ltd) Hydrochlorothiazide/Amlodipine besilate/Olmesartan medoxomil 25mg + 5mg + 40mg Tablet Oral

Spiro-co 50mg+50mg Tablet (IVAX Pharmaceuticals UK Ltd) Spironolactone/Hydroflumethiazide 50mg + 50mg Tablet Oral

Olmotec Plus 20mg/12.5mg tablets (Daiichi Sankyo UK Ltd) Hydrochlorothiazide/Olmesartan medoxomil 12.5mg + 20mg Tablet Oral

Furosemide 40mg/5ml oral solution sugar free (Sigma Pharmaceuticals Plc) Furosemide 8mg/1ml Oral solution Gastroenteral/Oral  
Amiloride 5mg / hydrochlorothiazide 50mg tablets Amiloride Hydrochloride/Hydrochlorothiazide 5mg + 50mg Tablets Oral  
Chlorothiazide 5mg/5ml oral suspension Chlorothiazide 1mg/1ml Oral suspension Oral  
Hydrochlorothiazide with olmesartan medoxomil 12.5mg with 20mg tablet  
Hydrochlorothiazide/Olmesartan Medoxomil 12.5mg + 20mg Tablet Oral  
Co-Diovan 160mg/12.5mg tablets (Novartis Pharmaceuticals UK Ltd)  
Valsartan/Hydrochlorothiazide 160mg + 12.5mg Tablet Oral  
MIN-I-JET 80MG FRUSEMIDE INJ MG INJ  
Furosemide with amiloride 20mg+2.5mg Tablet Amiloride Hydrochloride/Furosemide 20mg+2.5mg Tablet Oral  
FRUSEMIDE 20MG/SPIRONOLACTONE 50MG MG CAP  
Neo-Naclex 2.5mg tablets (Advanz Pharma) Bendroflumethiazide 2.5mg Tablet Oral  
Centyl k 2.5mg+7.7mmol Tablet (Edwin Burgess Ltd) Bendroflumethiazide/Potassium chloride 2.5mg + 573mg Modified-release tablet Oral  
Adizem-SR 180mg capsules (Napp Pharmaceuticals Ltd) Diltiazem hydrochloride 180mg Modified-release capsule Oral  
MODURETIC  
LASIX 10 MG INJ

Bendroflumethiazide 5mg with Propanolol 160mg modified-release capsules  
Bendroflumethiazide/Propranolol Hydrochloride 5mg + 160mg Modified Release Capsules Oral  
Frumil Is 20mg+2.5mg Tablet (Helios Healthcare Ltd) Amiloride hydrochloride/Furosemide 2.5mg + 20mg Tablet Oral

Frumil 40mg/5mg tablets (Sanofi) Amiloride hydrochloride/Furosemide 5mg + 40mg Tablet Oral

Olmesartan medoxomil with amlodipine and hydrochlorothiazide 20mg + 5mg + 12.5mg Tablet  
Amlodipine/Hydrochlorothiazide/Olmesartan Medoxomil 20mg + 5mg + 12.5mg Tablet Oral  
CoAprovel 300mg/12.5mg tablets (Mawdsley-Brooks & Company Ltd)  
Irbesartan/Hydrochlorothiazide 300mg + 12.5mg Tablet Oral

Olmesartan medoxomil with amlodipine and hydrochlorothiazide 40mg + 10mg + 25mg Tablet  
Amlodipine/Hydrochlorothiazide/Olmesartan Medoxomil 40mg + 10mg + 25mg Tablet  
Nadolol 80mg / Bendroflumethiazide 5mg tablets Nadolol/Bendroflumethiazide 80mg + 5mg Tablet Oral

Lisinopril 10mg / Hydrochlorothiazide 12.5mg tablets (Teva UK Ltd)

Lisinopril/Hydrochlorothiazide 10mg + 12.5mg Tablet Oral

Furosemide 40mg Tablet (M & A Pharmachem Ltd) Furosemide 40mg Tablet Oral

Xipamide 20mg tablets Xipamide 20mg Tablet Oral

Propranolol 160mg modified-release / Bendroflumethiazide 5mg capsules Propranolol hydrochloride/Bendroflumethiazide 160mg + 5mg Modified-release capsule Oral

ADIZEM CONTINUS 120 MG TAB

Chlorothiazide 500mg/5ml oral solution Chlorothiazide 100mg/1ml Oral solution Oral

Adizem-SR 120mg capsules (Waymade Healthcare Plc) Diltiazem hydrochloride 120mg Modified-release capsule Oral

Valsartan 80mg / Hydrochlorothiazide 12.5mg tablets Valsartan/Hydrochlorothiazide 80mg + 12.5mg Tablet Oral

PINDOLOL 10MG/CLOPAMIDE 5MG



Pindolol 10mg / Clopamide 5mg tablets Pindolol/Clopamide 10mg + 5mg Tablet Oral  
Lasipressin Tablet (Hoechst UK Ltd) Furosemide/Penbutolol Tablet Oral  
Carace 5mg tablets (Bristol-Myers Squibb Pharmaceuticals Ltd) Lisinopril 5mg Tablet Oral  
Chlortalidone 50mg tablets Chlortalidone 50mg Tablet Oral  
FRUSEMIDE (2ML)  
Bendroflumethiazide oral solution Bendroflumethiazide  
Hydrochlorothiazide with valsartan 12.5mg with 160mg Tablet Hydrochlorothiazide/Valsartan  
12.5mg + 160mg Tablet Oral  
Spironolactone 5mg/5ml / Chlorothiazide 50mg/5ml oral suspension  
Spironolactone/Chlorothiazide 1mg/1ml + 10mg/1ml Oral suspension Oral

Tenchor 50mg/12.5mg tablets (Teva UK Ltd) Atenolol/Chlortalidone 50mg + 12.5mg Tablet Oral  
Bumetanide 1mg tablets Bumetanide 1mg Tablet Oral  
Adizem sr 120mg Modified-release tablet (Napp Pharmaceuticals Ltd) Diltiazem hydrochloride  
120mg Modified-release tablet Oral

Navidrex 500microgram tablets (Advanz Pharma) Cyclopentiazide 500microgram Tablet Oral  
Zestoretic 10 tablets (AstraZeneca UK Ltd) Lisinopril/Hydrochlorothiazide 10mg + 12.5mg Tablet  
Oral  
Co-amilofruse 10mg/80mg tablets (Wockhardt UK Ltd) Amiloride hydrochloride/Furosemide  
10mg + 80mg Tablet Oral  
Atenolol 50mg with Chlortalidone 12.5mg tablets Atenolol/Chlortalidone 50mg+12.5mg Tablets  
Oral  
Furosemide 10mg/5ml oral solution Furosemide 2mg/1ml Oral solution Oral  
Timolol maleate with amiloride and hydrochlorothiazide Tablet Amiloride  
Hydrochloride/Hydrochlorothiazide/Timolol Maleate Tablet Oral  
Zaroxolyn 2.5mg tablets (IDIS) Metolazone 2.5mg Tablet Oral  
Losartan 50mg / Hydrochlorothiazide 12.5mg tablets Losartan potassium/Hydrochlorothiazide  
50mg + 12.5mg Tablet Oral  
Losartan 100mg / Hydrochlorothiazide 12.5mg tablets (Teva UK Ltd)  
Hydrochlorothiazide/Losartan potassium 12.5mg + 100mg Tablet Oral  
Hydrenox 50mg Tablet (Knoll Ltd) Hydroflumethiazide 50mg Tablet Oral  
Furosemide 5mg/5ml oral suspension Furosemide 1mg/1ml Oral suspension Oral  
Furosemide 50mg/5ml oral solution Furosemide 10mg/1ml Oral solution Oral  
Indipam XL 1.5mg tablets (Actavis UK Ltd) Indapamide 1.5mg Modified-release tablet Oral  
Furosemide 500mg tablets (A A H Pharmaceuticals Ltd) Furosemide 500mg Tablet Oral  
Furosemide 20mg / Potassium chloride 750mg (potassium 10mmol) modified-release tablets  
Potassium chloride/Furosemide 750mg + 20mg Modified-release tablet Oral  
Bendroflumethiazide 5mg tablets (IVAX Pharmaceuticals UK Ltd) Bendroflumethiazide 5mg  
Tablet Oral  
Losartan 50mg / Hydrochlorothiazide 12.5mg tablets (Lupin Healthcare (UK) Ltd) Losartan  
potassium/Hydrochlorothiazide 50mg + 12.5mg Tablet Oral  
Co-tenidone 50mg/12.5mg tablets (A A H Pharmaceuticals Ltd) Atenolol/Chlortalidone 50mg +  
12.5mg Tablet Oral  
Furosemide 40mg tablets (IVAX Pharmaceuticals UK Ltd) Furosemide 40mg Tablet Oral  
Furosemide 80mg/8ml solution for injection pre-filled syringes Furosemide 10mg/1ml Solution  
for injection Intravenous/Intramuscular  
Atenolol 25mg / Bendroflumethiazide 1.25mg capsules Atenolol/Bendroflumethiazide 25mg +  
1.25mg Capsule Oral  
Clopamide 5mg with Pindolol 10mg tablets Clopamide/Pindolol 5mg + 10mg Tablets Oral

Polythiazide 1mg tablets Polythiazide 1mg Tablet Oral  
Metolazone 2.5mg/5ml oral solution Metolazone 500microgram/1ml Oral solution Oral  
Viskaldix tablets (Waymade Healthcare Plc) Pindolol/Clopamide 10mg + 5mg Tablet Oral  
Cozaar-Comp 100mg/12.5mg tablets (Merck Sharp & Dohme Ltd) Hydrochlorothiazide/Losartan potassium 12.5mg + 100mg Tablet Oral  
Bendroflumethiazide 2.5mg tablets (Alliance Healthcare (Distribution) Ltd) Bendroflumethiazide 2.5mg Tablet Oral  
Co-amilorfruse 10mg/80mg tablets Amiloride hydrochloride/Furosemide 10mg + 80mg Tablet Oral  
Reserpine with hydrochlorothiazide tablet Hydrochlorothiazide/Reserpine Tablets Oral  
Burinex 5mg tablets (LEO Pharma) Bumetanide 5mg Tablet Oral  
Neo-Naclex 5mg tablets (Mercury Pharma Group Ltd) Bendroflumethiazide 5mg Tablet Oral  
Frusol 50mg/5ml oral solution (Rosemont Pharmaceuticals Ltd) Furosemide 10mg/1ml Oral solution Oral  
Furosemide 10mg/ml Injection Furosemide 10mg/ml Injection  
Hygroton 100mg Tablet (Alliance Pharmaceuticals Ltd) Chlortalidone 100mg Tablet Oral  
Chlorothiazide 250mg/5ml oral solution Chlorothiazide 50mg/1ml Oral solution Oral  
Adizem-XL 120mg capsules (Napp Pharmaceuticals Ltd) Diltiazem hydrochloride 120mg Modified-release capsule Oral  
Co-Diovan 80mg/12.5mg tablets (Sigma Pharmaceuticals Plc) Valsartan/Hydrochlorothiazide 80mg + 12.5mg Tablet Oral  
Perindopril erbumine 4mg / Indapamide 1.25mg tablets Perindopril erbumine/Indapamide 4mg + 1.25mg Tablet Oral  
Cyclopenthiiazide 500microgram tablets Cyclopenthiiazide 500microgram Tablet Oral  
Adizem-XL 240mg capsules (Lexon (UK) Ltd) Diltiazem hydrochloride 240mg Modified-release capsule Oral  
Amiloride 10mg / furosemide 80mg tablets Amiloride Hydrochloride/Furosemide 10mg + 80mg Tablets Oral  
Amiloride 5mg / Bumetanide 1mg tablets Bumetanide/Amiloride hydrochloride 1mg + 5mg Tablet Oral  
Bendroflumethiazide 5mg tablets (Waymade Healthcare Plc) Bendroflumethiazide 5mg Tablet Oral  
Metenix 5mg tablets (Sanofi) Metolazone 5mg Tablet Oral  
Losartan 100mg / Hydrochlorothiazide 25mg tablets (A A H Pharmaceuticals Ltd) Losartan potassium/Hydrochlorothiazide 100mg + 25mg Tablet Oral  
Co-amilorfruse 5mg/40mg tablets (Mylan) Amiloride hydrochloride/Furosemide 5mg + 40mg Tablet Oral  
Carace 20 Tablet (Bristol-Myers Squibb Pharmaceuticals Ltd) Lisinopril/Hydrochlorothiazide 20mg + 12.5mg Tablet Oral  
Triamaxco 50mg/25mg tablets (Ashbourne Pharmaceuticals Ltd)  
Triamterene/Hydrochlorothiazide 50mg + 25mg Tablet Oral  
Furosemide 250mg/25ml solution for injection ampoules Furosemide 10mg/1ml Solution for injection Intravenous/Intramuscular  
Amiloride with atenolol with hydrochlorothiazide capsules Amiloride Hydrochloride/Atenolol/Hydrochlorothiazide Capsules Oral  
Dyazide 50mg/25mg tablets (Advanz Pharma) Triamterene/Hydrochlorothiazide 50mg + 25mg Tablet Oral  
Co-Diovan 80mg/12.5mg tablets (Novartis Pharmaceuticals UK Ltd)  
Valsartan/Hydrochlorothiazide 80mg + 12.5mg Tablet Oral  
LASIX (25ML)

LASIX (2ML)

LASIX PAED

Dyazide 50mg/25mg tablets (Lexon (UK) Ltd) Triamterene/Hydrochlorothiazide 50mg + 25mg  
Tablet Oral

Bumetanide 1mg/5ml oral solution sugar free Bumetanide 200microgram/1ml Oral solution Oral

Furosemide 500mg tablets (Teva UK Ltd) Furosemide 500mg Tablet Oral

Aridil 20mg+2.5mg Tablet (C P Pharmaceuticals Ltd) Amiloride hydrochloride/Furosemide 2.5mg  
+ 20mg Tablet Oral

Furosemide 10mg/ml Injection (Antigen Pharmaceuticals) Furosemide 10mg/ml Injection  
Intravenous Injection

CAPOZIDE

Burinex 1mg/5ml Oral solution (LEO Pharma) Bumetanide 200microgram/1ml Oral solution Oral

Adizem-XL 300mg capsules (Lexon (UK) Ltd) Diltiazem hydrochloride 300mg Modified-release  
capsule Oral

Zestoretic 10 tablets (Waymade Healthcare Plc) Lisinopril/Hydrochlorothiazide 10mg + 12.5mg  
Tablet Oral

Furosemide 40mg/5ml oral solution Furosemide 8mg/1ml Oral solution Oral

Bumetanide 1mg tablets (Teva UK Ltd) Bumetanide 1mg Tablet Oral

Co-Betaloc SA tablets (Pfizer Ltd) Metoprolol tartrate/Hydrochlorothiazide 200mg + 25mg  
Modified-release tablet Oral

CYCLOPENTHIAZIDE -K tablets Potassium Chloride/Cyclopentiazide Tablets Oral

Adizem xl 300mg Capsule (Napp Pharmaceuticals Ltd) Diltiazem hydrochloride 300mg Modified-  
release capsule Oral

Indapamide 2.5mg tablets (Mylan) Indapamide hemihydrate 2.5mg Tablet Oral

Amiloride 5mg tablets (Actavis UK Ltd) Amiloride hydrochloride 5mg Tablet Oral

Olmesartan medoxomil 20mg / Hydrochlorothiazide 12.5mg tablets

Hydrochlorothiazide/Olmesartan medoxomil 12.5mg + 20mg Tablet Oral

Bendroflumethiazide 5mg with Nadolol 80mg tablets Bendroflumethiazide/Nadolol

Burinex 0.5mg/ml Injection (LEO Pharma) Bumetanide 500microgram/1ml Solution for injection  
Intramuscular/Intravenous

Aprinox 5mg tablets (Amdipharm Plc) Bendroflumethiazide 5mg Tablet Oral

Lasix 50mg/5ml Injection (Hoechst UK Ltd) Furosemide 10mg/1ml Solution for injection  
Intravenous/Intramuscular

Totaretic 50mg+12.5mg Tablet (C P Pharmaceuticals Ltd) Atenolol/Chlortalidone 50mg + 12.5mg  
Tablet Oral

Tenoretic 100mg/25mg tablets (AstraZeneca UK Ltd) Atenolol/Chlortalidone 100mg + 25mg  
Tablet Oral

Tenchor 100mg/25mg tablets (Teva UK Ltd) Atenolol/Chlortalidone 100mg + 25mg Tablet Oral

Adizem-XL 200mg capsules (Napp Pharmaceuticals Ltd) Diltiazem hydrochloride 200mg Modified-  
release capsule Oral

Losartan 50mg / Hydrochlorothiazide 12.5mg tablets (Teva UK Ltd) Losartan  
potassium/Hydrochlorothiazide 50mg + 12.5mg Tablet Oral

Bendroflumethiazide 2.5mg tablets (Almus Pharmaceuticals Ltd) Bendroflumethiazide 2.5mg  
Tablet Oral

Amilamont 5mg/5ml oral solution sugar free (Rosemont Pharmaceuticals Ltd) Amiloride  
hydrochloride 1mg/1ml Oral solution Oral

MODUCREN

Furosemide 250mg/5ml solution for injection vials Furosemide 10mg/1ml Solution for injection Intravenous/Intramuscular

Co-amilofruse 5mg/40mg tablets Amiloride hydrochloride/Furosemide 5mg + 40mg Tablet Oral

Chlorothiazide 10mg/5ml oral solution Chlorothiazide 2mg/1ml Oral solution Oral

Timolol maleate with bendroflumethiazide 20mg + 5mg Tablet Bendroflumethiazide/Timolol Maleate 20mg + 5mg Tablet Oral

Furosemide 40mg/5ml oral solution sugar free (Advanz Pharma) Furosemide 8mg/1ml Oral solution Gastroenteral/Oral

Indapamide 1.5mg modified-release tablets (DE Pharmaceuticals) Indapamide 1.5mg Modified-release tablet Oral

Furosemide 40mg / Potassium chloride 600mg (potassium 8mmol) modified-release tablets

Potassium chloride/Furosemide 600mg + 40mg Modified-release tablet Oral

Natrilix 2.5mg tablets (Mawdsley-Brooks & Company Ltd) Indapamide hemihydrate 2.5mg Tablet Oral

Chlortalidone 25mg with Atenolol 100mg tablets Atenolol/Chlortalidone 25mg+100mg Tablets Oral

Triam-Co 50mg/25mg tablets (IVAX Pharmaceuticals UK Ltd) Triamterene/Hydrochlorothiazide 50mg + 25mg Tablet Oral

Perindopril arginine 5mg / Indapamide 1.25mg tablets Perindopril arginine/Indapamide 5mg + 1.25mg Tablet Oral

CHLOROTHIAZIDE 40MG /SPIRONOLACTONE 4MG POW

Losartan 100mg / Hydrochlorothiazide 12.5mg tablets Hydrochlorothiazide/Losartan potassium 12.5mg + 100mg Tablet Oral

Burinex A 5mg/1mg tablets (LEO Pharma) Bumetanide/Amiloride hydrochloride 1mg + 5mg Tablet Oral

Furosemide 1mg/5ml oral solution Furosemide 200microgram/1ml Oral solution Oral

Amil-Co 5mg/50mg tablets (IVAX Pharmaceuticals UK Ltd) Amiloride hydrochloride/Hydrochlorothiazide 5mg + 50mg Tablet Oral

Methoserpidine with benzthiazide Tablet Benzthiazide/Methoserpidine Tablet Oral

Secadrex 200mg/12.5mg tablets (Sanofi) Acebutolol hydrochloride/Hydrochlorothiazide 200mg + 12.5mg Tablet Oral

Metolazone 500microgram low dose Tablet Metolazone 500microgram Tablet Oral

Tenben 25mg/1.25mg capsules (Galen Ltd) Atenolol/Bendroflumethiazide 25mg + 1.25mg Capsule Oral

Delvas Tablet (Berk Pharmaceuticals Ltd) Amiloride hydrochloride/Hydrochlorothiazide 5mg + 50mg Tablet Oral

Spiro lactone 25mg with hydroflumethiazide 25mg tablet Spiro lactone/Hydroflumethiazide 25mg+25mg Tablets Oral

Furosemide 20mg/2ml solution for injection ampoules (Wockhardt UK Ltd) Furosemide 10mg/1ml Solution for injection Intravenous/Intramuscular

AMILORIDE 10 MG TAB

Frusol 20mg/5ml oral solution (Rosemont Pharmaceuticals Ltd) Furosemide 4mg/1ml Oral solution Oral

Baycaron 25mg Tablet (Bayer Plc) Mefruside 25mg Tablet Oral

Neo-Naclex-K modified-release tablets (Mercury Pharma Group Ltd) Potassium chloride/Bendroflumethiazide 630mg + 2.5mg Modified-release tablet Oral

CHLOROTHIAZIDE/SPIRONOLACTONE SACHETS 100 MG

Furosemide 20mg tablets (Teva UK Ltd) Furosemide 20mg Tablet Oral

Torasemide 5mg tablets (Teva UK Ltd) Torasemide 5mg Tablet Oral

Capozide LS 12.5mg/25mg tablets (Bristol-Myers Squibb Pharmaceuticals Ltd)  
Hydrochlorothiazide/Captopril 12.5mg + 25mg Tablet Oral  
Sotalol 80mg with hydrochlorothiazide 12.5mg tablet Hydrochlorothiazide/Sotalol Hydrochloride  
80mg + 12.5mg Tablets Oral  
Bendroflumethiazide 1.25mg with Potassium 573mg modified-release tablets Potassium  
Chloride/Bendroflumethiazide  
Co-tenidone 100mg/25mg tablets (IVAX Pharmaceuticals UK Ltd) Atenolol/Chlortalidone 100mg  
+ 25mg Tablet Oral  
Furosemide 40mg tablets (Ranbaxy (UK) Ltd) Furosemide 40mg Tablet Oral  
Bendroflumethiazide 2.5mg tablets (Teva UK Ltd) Bendroflumethiazide 2.5mg Tablet Oral  
Torasemide 10mg tablets Torasemide 10mg Tablet Oral  
Chlorothiazide 5mg/5ml oral solution Chlorothiazide 1mg/1ml Oral solution Oral  
Frumil LS 20mg/2.5mg tablets (Waymade Healthcare Plc) Amiloride hydrochloride/Furosemide  
2.5mg + 20mg Tablet Oral  
Carace 10 Tablet (Bristol-Myers Squibb Pharmaceuticals Ltd) Lisinopril/Hydrochlorothiazide  
10mg + 12.5mg Tablet Oral  
Chlortalidone 12.5mg with Atenolol 50mg tablets Atenolol/Chlortalidone 12.5mg+50mg Tablets  
Oral  
Furosemide 20mg tablets (Crescent Pharma Ltd) Furosemide 20mg Tablet Oral  
Hydrochlorothiazide with losartan 12.5mg with 100mg Tablet Hydrochlorothiazide/Losartan  
Potassium 12.5mg + 100mg Tablet Oral  
Bumetanide 5mg tablets Bumetanide 5mg Tablet Oral  
HYDROCHLOROTHIAZIDE 12.5MG/K 8.1MMOL S/R 12.5 MG TAB  
FRUSEMIDE 40MG/8MMOL POTASSIUM S/R MG TAB  
Fru-Co 5mg/40mg tablets (Teva UK Ltd) Amiloride hydrochloride/Furosemide 5mg + 40mg Tablet  
Oral  
Accuretic 10mg/12.5mg tablets (Pfizer Ltd) Hydrochlorothiazide/Quinapril hydrochloride 12.5mg  
+ 10mg Tablet Oral

Zestoretic 20 tablets (Lexon (UK) Ltd) Lisinopril/Hydrochlorothiazide 20mg + 12.5mg Tablet Oral  
Burinex K modified-release tablets (LEO Pharma) Bumetanide/Potassium chloride 500microgram  
+ 573mg Modified-release tablet Oral  
CHLOROTHIAZIDE 50 MG SUS  
Furosemide 20mg tablets (Sandoz Ltd) Furosemide 20mg Tablet Oral  
Hydrochlorothiazide with amiloride 25mgwith2.5mg Tablet Amiloride  
Hydrochloride/Hydrochlorothiazide 25mg+2.5mg Tablet Oral  
Frumil Forte 10mg/80mg tablets (Sanofi) Amiloride hydrochloride/Furosemide 10mg + 80mg  
Tablet Oral  
Co-tenidone 50mg/12.5mg tablets (IVAX Pharmaceuticals UK Ltd) Atenolol/Chlortalidone 50mg +  
12.5mg Tablet Oral  
Amiloride 5mg tablets (Accord Healthcare Ltd) Amiloride hydrochloride 5mg Tablet Oral  
Bendroflumethiazide 2.5mg Tablet (Regent Laboratories Ltd) Bendroflumethiazide 2.5mg Tablet  
Oral  
Co-tenidone 50mg/12.5mg tablets (Teva UK Ltd) Atenolol/Chlortalidone 50mg + 12.5mg Tablet  
Oral  
Zaroxolyn 2.5mg tablets (Imported (Canada)) Metolazone 2.5mg Tablet Oral  
Corgaretic 80mg tablets (Sanofi-Synthelabo Ltd) Nadolol/Bendroflumethiazide 80mg + 5mg  
Tablet Oral  
Cozaar-Comp 50mg/12.5mg tablets (Sigma Pharmaceuticals Plc) Losartan  
potassium/Hydrochlorothiazide 50mg + 12.5mg Tablet Oral

Co-tenidone 100mg/25mg tablets (DE Pharmaceuticals) Atenolol/Chlortalidone 100mg + 25mg Tablet Oral

Losartan 100mg / Hydrochlorothiazide 12.5mg tablets (A A H Pharmaceuticals Ltd) Hydrochlorothiazide/Losartan potassium 12.5mg + 100mg Tablet Oral

Adizem-XL 120mg capsules (Lexon (UK) Ltd) Diltiazem hydrochloride 120mg Modified-release capsule Oral

Telmisartan 80mg / Hydrochlorothiazide 12.5mg tablets Telmisartan/Hydrochlorothiazide 80mg + 12.5mg Tablet Oral

Prestim forte Tablet (LEO Pharma) Bendroflumethiazide/Timolol Maleate Tablet Oral

Cyclopentiazide 0.25mg with oxprenolol 160mg modified-release tablets Oxprenolol Hydrochloride/Cyclopentiazide

Hydrochlorothiazide with metoprolol tartrate 25mg with 200mg Modified-release tablet

Hydrochlorothiazide/Metoprolol Tartrate 25mg + 200mg Modified-Release Tablet Oral

Etacrynic 50mg/vial injection Etacrynic Acid 50mg/vial Injection

Cardide SR 1.5mg tablets (Teva UK Ltd) Indapamide 1.5mg Modified-release tablet Oral

Hydrochlorothiazide Capsule Hydrochlorothiazide Capsule Oral

FRUSEMIDE

Arelix 6mg Capsule (Hoechst Marion Roussel) Piretanide 6mg Capsule Oral

Furosemide 40mg tablets (Kent Pharmaceuticals Ltd) Furosemide 40mg Tablet Oral

Monozide 10 tablets (Wyeth Pharmaceuticals) Bisoprolol fumarate/Hydrochlorothiazide 10mg + 6.25mg Tablet Oral

Brinaldix k Effervescent tablet (Berk Pharmaceuticals Ltd) Potassium Chloride/Clopamide Effervescent Tablet Oral

ADIZEM-XL 180 MG CAP

Bendroflumethiazide 5mg tablets (Sovereign Medical Ltd) Bendroflumethiazide 5mg Tablet Oral

Actelsar HCT 80mg/12.5mg tablets (Actavis UK Ltd) Telmisartan/Hydrochlorothiazide 80mg + 12.5mg Tablet Oral

Irbesartan 300mg / Hydrochlorothiazide 25mg tablets Hydrochlorothiazide/Irbesartan 25mg + 300mg Tablet Oral

Trasidrex modified-release tablets (Mercury Pharma Group Ltd) Oxprenolol hydrochloride/Cyclopentiazide 160mg + 250microgram Modified-release tablet Oral

Torasemide 5mg tablets (A A H Pharmaceuticals Ltd) Torasemide 5mg Tablet Oral

Amiloride 2.5mg / Cyclopentiazide 250microgram tablets Amiloride hydrochloride/Cyclopentiazide 2.5mg + 250microgram Tablet Oral

Adizem-XL 120mg capsules (Waymade Healthcare Plc) Diltiazem hydrochloride 120mg Modified-release capsule Oral

Hydrochlorothiazide 50mg tablets Hydrochlorothiazide 50mg Tablet Oral

Timolol 10mg / Amiloride 2.5mg / Hydrochlorothiazide 25mg tablets Amiloride hydrochloride/Timolol maleate/Hydrochlorothiazide 2.5mg + 10mg + 25mg Tablet Oral

Carace 10mg tablets (Bristol-Myers Squibb Pharmaceuticals Ltd) Lisinopril 10mg Tablet Oral

Spiro-co 25mg+25mg Tablet (IVAX Pharmaceuticals UK Ltd) Spironolactone/Hydroflumethiazide 25mg + 25mg Tablet Oral

Torasemide 5mg tablets Torasemide 5mg Tablet Oral

Spironolactone 50mg with hydroflumethiazide 50mg tablet Spironolactone/Hydroflumethiazide 50mg+50mg Tablets Oral

Adizem xl plus 150mg+12.5mg Modified-release capsule (Napp Pharmaceuticals Ltd) Diltiazem Hydrochloride/Hydrochlorothiazide 150mg+12.5mg Modified-Release Capsule Oral

Froop Co 5mg/40mg tablets (Ashbourne Pharmaceuticals Ltd) Amiloride hydrochloride/Furosemide 5mg + 40mg Tablet Oral  
AMILORIDE HYDROCHLORIDE  
Bumetanide 1mg tablets (Mylan) Bumetanide 1mg Tablet Oral  
Furosemide with amiloride 80mg+10mg Tablet Amiloride Hydrochloride/Furosemide 80mg+10mg Tablet Oral

Olmesartan medoxomil with amlodipine and hydrochlorothiazide 40mg + 5mg + 12.5mg Tablet  
Amlodipine/Hydrochlorothiazide/Olmesartan Medoxomil 40mg + 5mg + 12.5mg Tablet Oral  
Aluzine 20mg Tablet (M A Steinhard Ltd) Furosemide 20mg Tablet Oral  
Perindopril arginine 4mg with Indapamide 1.25mg tablet Indapamide/Perindopril Erbumine 4mg + 1.25mg Tablets Oral

Indapamide 2.5mg tablets (Strides Pharma UK Ltd) Indapamide hemihydrate 2.5mg Tablet Oral  
Hydromet Tablet (MSD Thomas Morson Pharmaceuticals) Hydrochlorothiazide/Methylidopa Anhydrous Tablet Oral  
Co-amilofruse 2.5mg/20mg tablets Amiloride hydrochloride/Furosemide 2.5mg + 20mg Tablet Oral

DYAZIDE

ESIDREX-K TAB

Carace 20 Plus tablets (Merck Sharp & Dohme Ltd) Lisinopril/Hydrochlorothiazide 20mg + 12.5mg Tablet Oral

Generic Sevikar HCT 40mg/10mg/12.5mg tablets Hydrochlorothiazide/Olmesartan medoxomil/Amlodipine besilate 12.5mg + 40mg + 10mg Tablet Oral

Triamterene 50mg / Chlortalidone 50mg tablets Chlortalidone/Triamterene 50mg + 50mg Tablet Oral

SOTAZIDE

Tolerzide Tablet (Bristol-Myers Squibb Pharmaceuticals Ltd) Hydrochlorothiazide/Sotalol Hydrochloride Tablet Oral

Telmisartan 40mg / Hydrochlorothiazide 12.5mg tablets Telmisartan/Hydrochlorothiazide 40mg + 12.5mg Tablet Oral

Bendroflumethiazide 5mg/5ml oral suspension Bendroflumethiazide 1mg/1ml Oral suspension Oral

Furosemide 2mg/5ml oral solution Furosemide 400microgram/1ml Oral solution Oral

CHLOROTHIAZIDE/SPIRONOLACTONE/LACT SACH 50 MG

Bumetanide 1mg tablets (IVAX Pharmaceuticals UK Ltd) Bumetanide 1mg Tablet Oral

Chlorothiazide 50mg/5ml oral suspension Chlorothiazide 10mg/1ml Oral suspension Oral

Ethibide XL 1.5mg tablets (Genus Pharmaceuticals Ltd) Indapamide 1.5mg Modified-release tablet Oral

Clopamide with Potassium effervescent tablets Potassium Chloride/Clopamide Effervescent Tablet Oral

Bumetanide 1mg tablets (Waymade Healthcare Plc) Bumetanide 1mg Tablet Oral

Hydrochlorothiazide with atenolol and amiloride Capsule Amiloride

Hydrochloride/Atenolol/Hydrochlorothiazide Capsule Oral

Diumide-K Continus tablets (Teofarma) Potassium chloride/Furosemide 600mg + 40mg Modified-release tablet Oral

Zestoretic 10- 10mg+12.5mg Tablet (AstraZeneca UK Ltd) Lisinopril/Hydrochlorothiazide 10mg + 12.5mg Tablet Oral

Amilospare Tablet (Ashbourne Pharmaceuticals Ltd) Amiloride hydrochloride 5mg Tablet Oral

Lisinopril 10mg / Hydrochlorothiazide 12.5mg tablets (Almus Pharmaceuticals Ltd)  
Lisinopril/Hydrochlorothiazide 10mg + 12.5mg Tablet Oral

Esidrex 25mg Tablet (Novartis Pharmaceuticals UK Ltd) Hydrochlorothiazide 25mg Tablet Oral  
Tensaid XL 1.5mg tablets (Mylan) Indapamide 1.5mg Modified-release tablet Oral  
Bumetanide 5mg tablets (Teva UK Ltd) Bumetanide 5mg Tablet Oral  
Bendroflumethiazide 2.5mg tablets (Actavis UK Ltd) Bendroflumethiazide 2.5mg Tablet Oral  
Kalspare tablets (DHP Healthcare Ltd) Chlortalidone/Triamterene 50mg + 50mg Tablet Oral  
ENDURONYL TAB  
Adizem-SR 180mg capsules (Lexon (UK) Ltd) Diltiazem hydrochloride 180mg Modified-release capsule Oral  
Furosemide 20mg/2ml solution for injection ampoules (Alliance Healthcare (Distribution) Ltd)  
Furosemide 10mg/1ml Solution for injection Intravenous/Intramuscular

Opumide 2.5mg Tablet (Opus Pharmaceuticals Ltd) Indapamide hemihydrate 2.5mg Tablet Oral

Nindaxa 2.5 tablets (Ashbourne Pharmaceuticals Ltd) Indapamide hemihydrate 2.5mg Tablet Oral  
Chlorothiazide 200mg/5ml oral solution Chlorothiazide 40mg/1ml Oral solution Oral  
Metolazone 5mg/5ml oral solution Metolazone 1mg/1ml Oral solution Oral  
Furosemide 20mg tablets (Boston Healthcare Ltd) Furosemide 20mg Tablet Oral

Olmesartan medoxomil with amlodipine and hydrochlorothiazide 40mg + 5mg + 25mg Tablet  
Amlodipine/Hydrochlorothiazide/Olmesartan Medoxomil 40mg + 5mg + 25mg Tablet Oral  
TRIAMTERENE 50MG HYDROCHLOROTHIAZIDE25MG

Furosemide 20mg/2ml Injection (Celltech Pharma Europe Ltd) Furosemide 20mg/2ml Injection  
Furosemide 1mg/ml Oral solution Furosemide 1mg/ml Oral Solution Oral

Amiloride 5mg/5ml oral suspension Amiloride hydrochloride 1mg/1ml Oral suspension Oral  
Saluric 500mg Tablet (Merck Sharp & Dohme Ltd) Chlorothiazide 500mg Tablet Oral  
Furosemide 20mg/5ml sugar free Oral solution (Rosemont Pharmaceuticals Ltd) Furosemide  
4mg/1ml Oral solution Oral

Bendroflumethiazide 5mg tablets (Accord Healthcare Ltd) Bendroflumethiazide 5mg Tablet Oral  
Moduretic Tablet (Bristol-Myers Squibb Pharmaceuticals Ltd) Amiloride  
hydrochloride/Hydrochlorothiazide 5mg + 50mg Tablet Oral  
Furosemide 40mg tablets (Mylan) Furosemide 40mg Tablet Oral  
Chlorothiazide 500mg tablets Chlorothiazide 500mg Tablet Oral  
Co-amilofruse 5mg/40mg tablets (A A H Pharmaceuticals Ltd) Amiloride  
hydrochloride/Furosemide 5mg + 40mg Tablet Oral  
Edecrin 50mg Tablet (Merck Sharp & Dohme Ltd) Etacrynic Acid 50mg Tablet Oral  
Hygroton -k Tablet (Novartis Pharmaceuticals UK Ltd) Potassium Chloride/Chlortalidone Tablet  
Oral  
Chlorothiazide 60mg/5ml oral suspension Chlorothiazide 12mg/1ml Oral suspension Oral  
Adizem-XL 180mg capsules (DE Pharmaceuticals) Diltiazem hydrochloride 180mg Modified-  
release capsule Oral  
FRUSEMIDE 40MG/AMILORIDE HYD 5MG

Indapamide 2.5mg tablets (DE Pharmaceuticals) Indapamide hemihydrate 2.5mg Tablet Oral



Aldactide 50 tablets (Pfizer Ltd) Spironolactone/Hydroflumethiazide 50mg + 50mg Tablet Oral  
Kalspare Is Tablet (Dominion Pharma) Chlortalidone/Triamterene Tablet Oral  
Enduron 5mg Tablet (Abbott Laboratories Ltd) Methyclothiazide 5mg Tablet Oral

Sevikar HCT 40mg/10mg/25mg tablets (Daiichi Sankyo UK Ltd) Hydrochlorothiazide/Olmesartan medoxomil/Amlodipine besilate 25mg + 40mg + 10mg Tablet Oral  
Co-amilozide 2.5mg/25mg tablets (Mawdsley-Brooks & Company Ltd) Amiloride hydrochloride/Hydrochlorothiazide 2.5mg + 25mg Tablet Oral  
Frumil 40mg+5mg Tablet (Helios Healthcare Ltd) Amiloride hydrochloride/Furosemide 5mg + 40mg Tablet Oral

#### BURINEX

CoAprovel 300mg/25mg tablets (Sanofi) Hydrochlorothiazide/Irbesartan 25mg + 300mg Tablet Oral  
Berkozide 2.5mg Tablet (Berk Pharmaceuticals Ltd) Bendroflumethiazide 2.5mg Tablet Oral  
Acezide 25mg/50mg tablets (Bristol-Myers Squibb Pharmaceuticals Ltd)  
Hydrochlorothiazide/Captopril 25mg + 50mg Tablet Oral  
Furosemide 40mg tablets (Mawdsley-Brooks & Company Ltd) Furosemide 40mg Tablet Oral  
HYDROCHLOROTHIAZIDE 12.5MG/K 8.1MMOL S/R  
Furosemide 5mg/5ml oral solution sugar free Furosemide 1mg/1ml Oral solution Oral  
CHLOROTHIAZIDE 60MG / SPIRONOLACTONE 6MG POW  
Co-tenidone 100mg/25mg tablets (Teva UK Ltd) Atenolol/Chlortalidone 100mg + 25mg Tablet Oral  
Bendroflumethiazide 2.5mg tablets (Sovereign Medical Ltd) Bendroflumethiazide 2.5mg Tablet Oral

Carace 2.5mg tablets (Bristol-Myers Squibb Pharmaceuticals Ltd) Lisinopril 2.5mg Tablet Oral  
CHLOROTHIAZIDE/SPIRONOLACTONE/LACTOSE MG POW  
Amiloride 5mg tablets (Wockhardt UK Ltd) Amiloride hydrochloride 5mg Tablet Oral  
Capozide 25mg/50mg tablets (Dowelhurst Ltd) Hydrochlorothiazide/Captopril 25mg + 50mg Tablet Oral  
Centyl 2.5mg Tablet (Edwin Burgess Ltd) Bendroflumethiazide 2.5mg Tablet Oral  
Amiloride 2.5mg / furosemide 20mg tablets Amiloride Hydrochloride/Furosemide 2.5mg + 20mg Tablets Oral  
Bumetanide 1mg tablets (Actavis UK Ltd) Bumetanide 1mg Tablet Oral  
Metolazone Oral solution Metolazone Oral Solution  
Co-amilofruse 5mg/40mg tablets (Actavis UK Ltd) Amiloride hydrochloride/Furosemide 5mg + 40mg Tablet Oral  
MicardisPlus 80mg/12.5mg tablets (Boehringer Ingelheim Ltd) Telmisartan/Hydrochlorothiazide 80mg + 12.5mg Tablet Oral  
Co-amilozide 5mg/50mg tablets (Wockhardt UK Ltd) Amiloride hydrochloride/Hydrochlorothiazide 5mg + 50mg Tablet Oral  
Froop 40mg tablets (Ashbourne Pharmaceuticals Ltd) Furosemide 40mg Tablet Oral  
Furosemide 6.5mg/5ml oral solution Furosemide 1.3mg/1ml Oral solution Oral  
Co-zidocapt 25mg/50mg tablets Hydrochlorothiazide/Captopril 25mg + 50mg Tablet Oral  
Innozide 20mg/12.5mg tablets (Merck Sharp & Dohme Ltd) Enalapril maleate/Hydrochlorothiazide 20mg + 12.5mg Tablet Oral  
Enalapril 20mg / Hydrochlorothiazide 12.5mg tablets (Tillomed Laboratories Ltd) Enalapril maleate/Hydrochlorothiazide 20mg + 12.5mg Tablet Oral

Adizem-XL 180mg capsules (Napp Pharmaceuticals Ltd) Diltiazem hydrochloride 180mg Modified-release capsule Oral

Bendroflumethiazide 2.5mg with Timolol maleate 10mg tablets Bendroflumethiazide/Timolol Maleate 2.5mg + 10mg Tablets Oral

Perindopril tosilate 5mg / Indapamide 1.25mg tablets Perindopril tosilate/Indapamide 5mg + 1.25mg Tablet Oral

Co-amilozone 5mg/50mg tablets (A A H Pharmaceuticals Ltd) Amiloride hydrochloride/Hydrochlorothiazide 5mg + 50mg Tablet Oral

Furosemide 20mg tablets (Kent Pharmaceuticals Ltd) Furosemide 20mg Tablet Oral

Carace 10 Plus tablets (Merck Sharp & Dohme Ltd) Lisinopril/Hydrochlorothiazide 10mg + 12.5mg Tablet Oral

Hydrochlorothiazide with triamterene 25mgwith50mg Tablet Hydrochlorothiazide/Triamterene 25mg+50mg Tablet Oral

Metolazone 2.5mg tablets Metolazone 2.5mg Tablet Oral

Dytide capsules (Mercury Pharma Group Ltd) Triamterene/Benzthiazide 50mg + 25mg Capsule Oral

Furosemide 20mg tablets (Mylan) Furosemide 20mg Tablet Oral

Co-amilozone 5mg/50mg/5ml oral solution Amiloride hydrochloride/Hydrochlorothiazide 1mg/1ml + 10mg/1ml Oral solution Oral

Losartan 50mg / Hydrochlorothiazide 12.5mg tablets (DE Pharmaceuticals) Losartan potassium/Hydrochlorothiazide 50mg + 12.5mg Tablet Oral

Nephрил 1mg Tablet (Pfizer Ltd) Polythiazide 1mg Tablet Oral

Furosemide 40mg tablets (Arrow Generics Ltd) Furosemide 40mg Tablet Oral

Capozide 25mg/50mg tablets (Bristol-Myers Squibb Pharmaceuticals Ltd) Hydrochlorothiazide/Captopril 25mg + 50mg Tablet Oral

Bumetanide 1mg tablets (Alliance Healthcare (Distribution) Ltd) Bumetanide 1mg Tablet Oral

Triamterene 50mg capsules Triamterene 50mg Capsule Oral

Corgaretic 40mg tablets (Sanofi-Synthelabo Ltd) Nadolol/Bendroflumethiazide 40mg + 5mg Tablet Oral

Atenix Co 100 tablets (Ashbourne Pharmaceuticals Ltd) Atenolol/Chlortalidone 100mg + 25mg Tablet Oral

TENORETIC

Adizem-SR 90mg capsules (DE Pharmaceuticals) Diltiazem hydrochloride 90mg Modified-release capsule Oral

Bendroflumethiazide 5mg tablets (Teva UK Ltd) Bendroflumethiazide 5mg Tablet Oral

Furosemide 4mg/5ml oral solution Furosemide 800microgram/1ml Oral solution Oral

Bendroflumethiazide 2.5mg tablets Bendroflumethiazide 2.5mg Tablet Oral

Co-amilofruse 5mg/40mg/5ml oral suspension Amiloride hydrochloride/Furosemide 1mg/1ml + 8mg/1ml Oral suspension Oral

Co-tenidone 100mg/25mg tablets (Mylan) Atenolol/Chlortalidone 100mg + 25mg Tablet Oral

Actelsar HCT 80mg/25mg tablets (Actavis UK Ltd) Hydrochlorothiazide/Telmisartan 25mg + 80mg Tablet Oral

Aldactide 25 tablets (Pfizer Ltd) Spironolactone/Hydroflumethiazide 25mg + 25mg Tablet Oral

Bendroflumethiazide 2.5mg tablets (Dr Reddy's Laboratories (UK) Ltd) Bendroflumethiazide 2.5mg Tablet Oral

Co-amilozone 2.5mg/25mg tablets Amiloride hydrochloride/Hydrochlorothiazide 2.5mg + 25mg Tablet Oral

CHLOROTHIAZIDE / SPIRONOLACTONE 100 MG POW

Tenavoid Tablet (Edwin Burgess Ltd) Bendroflumethiazide/Meprobamate Tablet Oral

Losartan 100mg / Hydrochlorothiazide 12.5mg tablets (Phoenix Healthcare Distribution Ltd)

Hydrochlorothiazide/Losartan potassium 12.5mg + 100mg Tablet Oral

BRINALDIX K EFFERVESCENT

Telmisartan 80mg / Hydrochlorothiazide 25mg tablets Hydrochlorothiazide/Telmisartan 25mg + 80mg Tablet Oral

Furosemide 40mg tablets (Almus Pharmaceuticals Ltd) Furosemide 40mg Tablet Oral

Enalapril 20mg / Hydrochlorothiazide 12.5mg tablets Enalapril maleate/Hydrochlorothiazide 20mg + 12.5mg Tablet Oral

XIPAMIDE

Co-flumactone 50mg/50mg tablets Spironolactone/Hydroflumethiazide 50mg + 50mg Tablet Oral

Zestoretic 20 tablets (DE Pharmaceuticals) Lisinopril/Hydrochlorothiazide 20mg + 12.5mg Tablet Oral

Hydrochlorothiazide with metoprolol tartrate 12.5mg with 100mg tablet

Hydrochlorothiazide/Metoprolol Tartrate 12.5mg + 100mg Tablet Oral

Losartan 50mg / Hydrochlorothiazide 12.5mg tablets (Actavis UK Ltd) Losartan potassium/Hydrochlorothiazide 50mg + 12.5mg Tablet Oral

Coversyl Plus tablets (Servier Laboratories Ltd) Perindopril erbumine/Indapamide 4mg + 1.25mg Tablet Oral

Lopresoretic Tablet (Novartis Pharmaceuticals UK Ltd) Chlortalidone/Metoprolol Tartrate Tablet Oral

Furosemide 3mg/5ml oral suspension Furosemide 600microgram/1ml Oral suspension Oral

Esidrex -k Tablet (Novartis Pharmaceuticals UK Ltd) Potassium Chloride/Hydrochlorothiazide Tablet Oral

Furosemide 8mg/5ml oral suspension Furosemide 1.6mg/1ml Oral suspension Oral

Co-zidocapt 12.5mg/25mg tablets Hydrochlorothiazide/Captopril 12.5mg + 25mg Tablet Oral

Spironolactone 50mg / Furosemide 20mg capsules Furosemide/Spironolactone 20mg + 50mg Capsule Oral

FRUSEMIDE 20MG/POTASSIUM 10MMOL S/R MG TAB

Furosemide 20mg tablets (Sigma Pharmaceuticals Plc) Furosemide 20mg Tablet Oral

Bumetanide 1mg tablets (Almus Pharmaceuticals Ltd) Bumetanide 1mg Tablet Oral

Etacrynic 50mg tablets Etacrynic Acid 50mg Tablets Oral

Triamterene 50mg / Furosemide 40mg tablets Triamterene/Furosemide 50mg + 40mg Tablet Oral

Quinapril 10mg / Hydrochlorothiazide 12.5mg tablets Hydrochlorothiazide/Quinapril hydrochloride 12.5mg + 10mg Tablet Oral

Adizem-SR 90mg capsules (Napp Pharmaceuticals Ltd) Diltiazem hydrochloride 90mg Modified-release capsule Oral

Chlorothiazide 250mg/5ml oral suspension Chlorothiazide 50mg/1ml Oral suspension Oral

Furosemide 40mg tablets (Boston Healthcare Ltd) Furosemide 40mg Tablet Oral

TOTARETIC 100 TAB

MicardisPlus 40mg/12.5mg tablets (Boehringer Ingelheim Ltd) Telmisartan/Hydrochlorothiazide 40mg + 12.5mg Tablet Oral

Chlorothiazide 70mg/5ml oral solution Chlorothiazide 14mg/1ml Oral solution Oral

Coversyl Arginine Plus 5mg/1.25mg tablets (Servier Laboratories Ltd) Perindopril arginine/Indapamide 5mg + 1.25mg Tablet Oral

Bumetanide with Amiloride tablets Amiloride Hydrochloride/Bumetanide Tablets Oral

Atenolol 100mg with Chlortalidone 25mg tablets Atenolol/Chlortalidone 100mg+25mg Tablets Oral

Meprobamate with bendroflumethiazide Tablet Bendroflumethiazide/Meprobamate Tablet Oral  
Metoprolol 200mg modified-release / Hydrochlorothiazide 25mg tablets Metoprolol tartrate/Hydrochlorothiazide 200mg + 25mg Modified-release tablet Oral  
Cozaar-Comp 50mg/12.5mg tablets (Merck Sharp & Dohme Ltd) Losartan potassium/Hydrochlorothiazide 50mg + 12.5mg Tablet Oral  
Methyclothiazide 5mg Tablet Methyclothiazide 5mg Tablet Oral  
Torasemide 2.5mg tablets Torasemide 2.5mg Tablet Oral  
Bendroflumethiazide 2.5mg with Propranolol 80mg capsules Bendroflumethiazide/Propranolol Hydrochloride 2.5mg + 80mg Capsules Oral  
Captopril 50mg with Hydrochlorothiazide 25mg tablets Captopril/Hydrochlorothiazide 50mg + 25mg Tablets Oral  
Frusene 50mg/40mg tablets (Orion Pharma (UK) Ltd) Triamterene/Furosemide 50mg + 40mg Tablet Oral  
Burinex 1mg tablets (LEO Pharma) Bumetanide 1mg Tablet Oral  
Co-amilofruse 2.5mg/20mg tablets (Sandoz Ltd) Amiloride hydrochloride/Furosemide 2.5mg + 20mg Tablet Oral

Rawel XL 1.5mg tablets (Consilient Health Ltd) Indapamide 1.5mg Modified-release tablet Oral

Hydrosaluric 25mg tablets (Merck Sharp & Dohme Ltd) Hydrochlorothiazide 25mg Tablet Oral  
Furosemide 20mg Tablet (C P Pharmaceuticals Ltd) Furosemide 20mg Tablet Oral  
MicardisPlus 80mg/12.5mg tablets (Waymade Healthcare Plc) Telmisartan/Hydrochlorothiazide 80mg + 12.5mg Tablet Oral  
Betinex 1mg Tablet (Berk Pharmaceuticals Ltd) Bumetanide 1mg Tablet Oral

Olmesartan medoxomil with amlodipine and hydrochlorothiazide 40mg + 10mg + 12.5mg Tablet  
Amlodipine/Hydrochlorothiazide/Olmesartan Medoxomil 40mg + 10mg + 12.5mg Tablet Oral  
Furosemide 40mg/5ml sugar free Oral solution (Rosemont Pharmaceuticals Ltd) Furosemide 8mg/1ml Oral solution Gastroenteral/Oral

Bendroflumethiazide 2.5mg tablets (Wockhardt UK Ltd) Bendroflumethiazide 2.5mg Tablet Oral  
Furosemide 8mg/5ml oral solution Furosemide 1.6mg/1ml Oral solution Oral  
Chlorothiazide 12.5mg/5ml oral solution Chlorothiazide 2.5mg/1ml Oral solution Oral

Bendroflumethiazide 2.5mg / Potassium chloride 573mg (potassium 7.7mmol) modified-release tablets Bendroflumethiazide/Potassium chloride 2.5mg + 573mg Modified-release tablet Oral  
Furosemide 20mg/2ml Injection Furosemide 20mg/2ml Injection Intravenous Injection  
Hydroflumethiazide 50mg Tablet Hydroflumethiazide 50mg Tablet Oral  
Torem iv 10mg/2ml Intravenous injection (Boehringer Mannheim UK Ltd) Torasemide 10mg/2ml Intravenous Injection  
Capto-co 25mg+50mg Tablet (IVAX Pharmaceuticals UK Ltd) Hydrochlorothiazide/Captopril 25mg + 50mg Tablet Oral  
Furosemide Oral solution Furosemide Oral Solution  
Irbesartan 150mg / Hydrochlorothiazide 12.5mg tablets Hydrochlorothiazide/Irbesartan 12.5mg + 150mg Tablet Oral  
Co-amilofruse 5mg/40mg tablets (Teva UK Ltd) Amiloride hydrochloride/Furosemide 5mg + 40mg Tablet Oral

Adizem sr 120mg Modified-release capsule (Napp Pharmaceuticals Ltd) Diltiazem Hydrochloride 120mg Modified-Release Capsule Oral  
Irbesartan 300mg / Hydrochlorothiazide 12.5mg tablets (Actavis UK Ltd)  
Irbesartan/Hydrochlorothiazide 300mg + 12.5mg Tablet Oral  
Torem 2.5mg tablets (Mylan) Torasemide 2.5mg Tablet Oral  
TRIAMTERENE 50MG HYDROCHLOROTHIAZIDE 25MG TAB  
Co-amiloride 2.5mg/25mg tablets (Kent Pharmaceuticals Ltd) Amiloride hydrochloride/Hydrochlorothiazide 2.5mg + 25mg Tablet Oral

Bumetanide 500microgram / Potassium chloride 573mg (potassium 7.7mmol) modified-release tablets Bumetanide/Potassium chloride 500microgram + 573mg Modified-release tablet Oral  
Metolazone 5mg/5ml oral suspension Metolazone 1mg/1ml Oral suspension Oral

Metolazone 2.5mg/5ml oral suspension Metolazone 500microgram/1ml Oral suspension Oral  
Bendroflumethiazide 2.5mg tablets (A A H Pharmaceuticals Ltd) Bendroflumethiazide 2.5mg Tablet Oral

Furosemide 20mg/5ml oral solution sugar free Furosemide 4mg/1ml Oral solution Oral  
MicardisPlus 80mg/25mg tablets (Boehringer Ingelheim Ltd) Hydrochlorothiazide/Telmisartan 25mg + 80mg Tablet Oral  
Co-tenidone 50mg/12.5mg tablets Atenolol/Chlortalidone 50mg + 12.5mg Tablet Oral

Amiloride 5mg/5ml oral solution sugar free Amiloride hydrochloride 1mg/1ml Oral solution Oral  
Frumil 40mg/5mg tablets (Sigma Pharmaceuticals Plc) Amiloride hydrochloride/Furosemide 5mg + 40mg Tablet Oral

Min-i-jet furosemide 10mg/ml Injection (Celltech Pharma Europe Ltd) Furosemide 10mg/ml Injection Intravenous Injection

Zestoretic 10 tablets (Sigma Pharmaceuticals Plc) Lisinopril/Hydrochlorothiazide 10mg + 12.5mg Tablet Oral

Indapamide 2.5mg tablets (Phoenix Healthcare Distribution Ltd) Indapamide hemihydrate 2.5mg Tablet Oral

Indapamide 2.5mg tablets (Genus Pharmaceuticals Ltd) Indapamide hemihydrate 2.5mg Tablet Oral

Bumetanide 5mg tablets (A A H Pharmaceuticals Ltd) Bumetanide 5mg Tablet Oral

Furosemide 3mg/5ml oral solution Furosemide 600microgram/1ml Oral solution Oral

Furosemide 40mg tablets (Bristol Laboratories Ltd) Furosemide 40mg Tablet Oral

Diltiazem and hydrochlorothiazide 150mg+12.5mg modified-release capsules Diltiazem

Hydrochloride/Hydrochlorothiazide 150mg + 12.5mg Modified Release Capsules Oral

Furosemide 20mg/5ml oral suspension Furosemide 4mg/1ml Oral suspension Oral

Chlorothiazide 25mg/5ml oral suspension Chlorothiazide 5mg/1ml Oral suspension Oral

Bendroflumethiazide 2.5mg tablets (Genesis Pharmaceuticals Ltd) Bendroflumethiazide 2.5mg Tablet Oral

HYDROCHLOROTHIAZIDE /METOPROLOL TARTRATE 25 MG TAB

AMILORIDE 5MG/HYDROCHLOROTHIAZIDE 50MG

AMILORIDE 5MG/HYDROCHLOROTHIAZIDE 50MG

Adizem sr 90mg Modified-release capsule (Napp Pharmaceuticals Ltd) Diltiazem hydrochloride 90mg Modified-release capsule Oral

Lasilactone 20mg/50mg capsules (Sanofi) Furosemide/Spironolactone 20mg + 50mg Capsule Oral  
Prestim tablets (Meda Pharmaceuticals Ltd) Timolol maleate/Bendroflumethiazide 10mg + 2.5mg Tablet Oral

Piretanide 6mg capsule Piretanide 6mg Capsules Oral  
Bumetanide 1mg tablets (DE Pharmaceuticals) Bumetanide 1mg Tablet Oral

Furosemide 40mg tablets (Alliance Healthcare (Distribution) Ltd) Furosemide 40mg Tablet Oral  
Co-amilofruse 5mg/40mg tablets (Waymade Healthcare Plc) Amiloride  
hydrochloride/Furosemide 5mg + 40mg Tablet Oral  
Triamterene 50mg / Benzthiazide 25mg capsules Triamterene/Benzthiazide 50mg + 25mg  
Capsule Oral  
Furosemide 20mg Tablet (Celltech Pharma Europe Ltd) Furosemide 20mg Tablet Oral  
Hydrochlorothiazide with captopril 12.5mg with 25mg Tablet Captopril/Hydrochlorothiazide  
12.5mg + 25mg Tablet Oral  
Diuresal 40mg Tablet (Lagap) Furosemide 40mg Tablet Oral  
Furosemide 500mg Tablet (Berk Pharmaceuticals Ltd) Furosemide 500mg Tablet Oral  
Bumetanide 1mg tablets (A A H Pharmaceuticals Ltd) Bumetanide 1mg Tablet Oral  
Amiloride 5.67mg tablets Amiloride Hydrochloride 5.67mg Tablets Oral  
Furosemide 500mg tablets Furosemide 500mg Tablet Oral

Indapamide 2.5mg tablets (Boston Healthcare Ltd) Indapamide hemihydrate 2.5mg Tablet Oral  
Hydrochlorothiazide with losartan 12.5mg with 50mg Tablet Hydrochlorothiazide/Losartan  
Potassium 12.5mg + 50mg Tablet Oral  
Sotazide Tablet (Bristol-Myers Squibb Pharmaceuticals Ltd) Hydrochlorothiazide/Sotalol  
Hydrochloride Tablet Oral  
Amiloride 2.5mg / hydrochlorothiazide 25mg tablets Amiloride  
Hydrochloride/Hydrochlorothiazide 2.5mg+25mg Tablets Oral  
Furosemide 40mg tablets (A A H Pharmaceuticals Ltd) Furosemide 40mg Tablet Oral  
Lasix 40mg tablets (Sanofi) Furosemide 40mg Tablet Oral

Furosemide 20mg tablets (Alliance Healthcare (Distribution) Ltd) Furosemide 20mg Tablet Oral  
CHLOROTHIAZIDE SACHETS 60 MG  
Torem 5mg tablets (Mylan) Torasemide 5mg Tablet Oral  
Inderex 160mg/5mg modified-release capsules (AstraZeneca UK Ltd) Propranolol  
hydrochloride/Bendroflumethiazide 160mg + 5mg Modified-release capsule Oral  
Co-tenidone 50mg/12.5mg tablets (Actavis UK Ltd) Atenolol/Chlortalidone 50mg + 12.5mg  
Tablet Oral  
Tenoretic 100mg/25mg tablets (Dowelhurst Ltd) Atenolol/Chlortalidone 100mg + 25mg Tablet  
Oral  
Lasix 20mg/2ml solution for injection ampoules (Sanofi) Furosemide 10mg/1ml Solution for  
injection Intravenous/Intramuscular  
Hypertane 50 Tablet (Schwarz Pharma Ltd) Amiloride hydrochloride/Hydrochlorothiazide 5mg +  
50mg Tablet Oral  
Co-amilozide 5mg/50mg tablets (Phoenix Healthcare Distribution Ltd) Amiloride  
hydrochloride/Hydrochlorothiazide 5mg + 50mg Tablet Oral  
Bumetanide 1mg tablets (Phoenix Healthcare Distribution Ltd) Bumetanide 1mg Tablet Oral  
Co-amilozide 2.5mg/25mg tablets (Wockhardt UK Ltd) Amiloride  
hydrochloride/Hydrochlorothiazide 2.5mg + 25mg Tablet Oral  
Atenix Co 50 tablets (Ashbourne Pharmaceuticals Ltd) Atenolol/Chlortalidone 50mg + 12.5mg  
Tablet Oral  
Amilmaxco 5mg/50mg tablets (Ashbourne Pharmaceuticals Ltd) Amiloride  
hydrochloride/Hydrochlorothiazide 5mg + 50mg Tablet Oral

Valsartan 160mg / Hydrochlorothiazide 25mg tablets Valsartan/Hydrochlorothiazide 160mg + 25mg Tablet Oral  
Mefruside 25mg Tablet Mefruside 25mg Tablet Oral  
Lisinopril 20mg / Hydrochlorothiazide 12.5mg tablets Lisinopril/Hydrochlorothiazide 20mg + 12.5mg Tablet Oral  
Bumetanide 2mg/4ml solution for injection ampoules Bumetanide 500microgram/1ml Solution for injection Intramuscular/Intravenous  
Chlorothiazide oral solution Chlorothiazide  
Furosemide 20mg tablets (DE Pharmaceuticals) Furosemide 20mg Tablet Oral  
Centyl 5mg Tablet (Edwin Burgess Ltd) Bendroflumethiazide 5mg Tablet Oral  
Losartan 50mg / Hydrochlorothiazide 12.5mg tablets (Ranbaxy (UK) Ltd) Losartan potassium/Hydrochlorothiazide 50mg + 12.5mg Tablet Oral

Co-triamterzide 50mg/25mg tablets Triamterene/Hydrochlorothiazide 50mg + 25mg Tablet Oral  
Furosemide 50mg/5ml solution for injection ampoules (Hameln Pharmaceuticals Ltd)  
Furosemide 10mg/1ml Solution for injection Intravenous/Intramuscular  
Amiloride 5mg tablets (Teva UK Ltd) Amiloride hydrochloride 5mg Tablet Oral  
Frusid 40mg tablets (Dr Reddy's Laboratories (UK) Ltd) Furosemide 40mg Tablet Oral  
Adizem-SR 120mg capsules (Napp Pharmaceuticals Ltd) Diltiazem hydrochloride 120mg Modified-release capsule Oral  
Furosemide 50mg/5ml oral solution sugar free Furosemide 10mg/1ml Oral solution Oral  
Losartan 100mg / Hydrochlorothiazide 25mg tablets Losartan potassium/Hydrochlorothiazide 100mg + 25mg Tablet Oral

Metoprolol tartrate with chlortalidone Tablet Chlortalidone/Metoprolol Tartrate Tablet Oral  
Furosemide 20mg/5ml oral solution sugar free (A A H Pharmaceuticals Ltd) Furosemide 4mg/1ml Oral solution Oral  
Zestoretic 20 tablets (Waymade Healthcare Plc) Lisinopril/Hydrochlorothiazide 20mg + 12.5mg Tablet Oral  
Olmotec Plus 20mg/25mg tablets (Daiichi Sankyo UK Ltd) Hydrochlorothiazide/Olmesartan medoxomil 25mg + 20mg Tablet Oral  
Co-tenidone 100mg/25mg tablets (A A H Pharmaceuticals Ltd) Atenolol/Chlortalidone 100mg + 25mg Tablet Oral

Esidrex 50mg Tablet (Novartis Pharmaceuticals UK Ltd) Hydrochlorothiazide 50mg Tablet Oral  
Moducren tablets (Merck Sharp & Dohme Ltd) Timolol maleate/Hydrochlorothiazide/Amiloride hydrochloride 10mg + 25mg + 2.5mg Tablet Oral  
Torem 10mg tablets (Mylan) Torasemide 10mg Tablet Oral  
Chlortalidone 100mg tablets Chlortalidone 100mg Tablets Oral  
Enalapril 20mg / Hydrochlorothiazide 12.5mg tablets (A A H Pharmaceuticals Ltd) Enalapril maleate/Hydrochlorothiazide 20mg + 12.5mg Tablet Oral  
Lasix 500mg tablets (Sanofi) Furosemide 500mg Tablet Oral  
Lasikal modified-release tablets (Borg Medicare) Potassium chloride/Furosemide 750mg + 20mg Modified-release tablet Oral  
Prestim Tablet (ICN Pharmaceuticals France S.A.) Timolol maleate/Bendroflumethiazide 10mg + 2.5mg Tablet Oral  
Bendroflumethiazide 5mg tablets (A A H Pharmaceuticals Ltd) Bendroflumethiazide 5mg Tablet Oral  
Bendroflumethiazide 5mg tablets (Dr Reddy's Laboratories (UK) Ltd) Bendroflumethiazide 5mg Tablet Oral

Furosemide 10mg/5ml oral suspension Furosemide 2mg/1ml Oral suspension Oral

Indapamide 1.5mg modified-release tablets Indapamide 1.5mg Modified-release tablet Oral  
Furosemide 50mg/5ml solution for injection ampoules (Peckforton Pharmaceuticals Ltd)  
Furosemide 10mg/1ml Solution for injection Intravenous/Intramuscular  
Centyl K modified-release tablets (LEO Pharma) Bendroflumethiazide/Potassium chloride 2.5mg  
+ 573mg Modified-release tablet Oral  
Furosemide 40mg tablets (Advanz Pharma) Furosemide 40mg Tablet Oral

Sevikar HCT 20mg/5mg/12.5mg tablets (Daiichi Sankyo UK Ltd) Hydrochlorothiazide/Amlodipine  
besilate/Olmesartan medoxomil 12.5mg + 5mg + 20mg Tablet Oral  
Lasix with k Tablet (Hoechst Marion Roussel) Potassium chloride/Furosemide 600mg + 40mg  
Modified-release tablet Oral  
Furosemide 20mg tablets (Bristol Laboratories Ltd) Furosemide 20mg Tablet Oral  
Lasix 5mg/5ml oral solution (Borg Medicare) Furosemide 1mg/1ml Oral solution Oral  
Chlortalidone 25mg tablets Chlortalidone 25mg Tablet Oral  
Chlorothiazide 250mg/5ml oral solution (Special Order) Chlorothiazide 50mg/1ml Oral solution  
Oral

Indapamide 2.5mg tablets (Niche Generics Ltd) Indapamide hemihydrate 2.5mg Tablet Oral  
CYCLOPENTHIAZIDE 250MCG/K 8.1MMOL  
Mapemid XL 1.5mg tablets (Teva UK Ltd) Indapamide 1.5mg Modified-release tablet Oral  
Adizem xl 180mg Capsule (Napp Pharmaceuticals Ltd) Diltiazem Hydrochloride 180mg Capsule  
Oral

Natrilix 2.5mg tablets (Servier Laboratories Ltd) Indapamide hemihydrate 2.5mg Tablet Oral  
Hydrochlorothiazide 12.5mg tablets Hydrochlorothiazide 12.5mg Tablet Oral  
Furosemide 20mg tablets (Wockhardt UK Ltd) Furosemide 20mg Tablet Oral  
Amiloride 5mg tablets Amiloride hydrochloride 5mg Tablet Oral  
Aprinox 2.5mg tablets (Advanz Pharma) Bendroflumethiazide 2.5mg Tablet Oral  
Bumetanide 1mg tablets (Niche Generics Ltd) Bumetanide 1mg Tablet Oral  
Indapamide 2.5mg tablets (Zentiva) Indapamide hemihydrate 2.5mg Tablet Oral  
Captopril 25mg with Hydrochlorothiazide 12.5mg tablets Captopril/Hydrochlorothiazide 25mg +  
12.5mg Tablets Oral  
Chlorothiazide 40mg/5ml oral suspension Chlorothiazide 8mg/1ml Oral suspension Oral  
Frumil 40mg/5mg tablets (Waymade Healthcare Plc) Amiloride hydrochloride/Furosemide 5mg +  
40mg Tablet Oral

Zaroxolyn 5mg tablets (Imported (Canada)) Metolazone 5mg Tablet Oral  
Co-flumactone 25mg/25mg tablets Spironolactone/Hydroflumethiazide 25mg + 25mg Tablet  
Oral

TOTARETIC 50 TAB

Co-amilozone 5mg with 50mg/ml oral solution Amiloride Hydrochloride/Hydrochlorothiazide 5mg  
+ 50mg/5ml Oral Solution Oral

Vasetic Tablet (Shire Pharmaceuticals Ltd) Amiloride hydrochloride/Hydrochlorothiazide 5mg +  
50mg Tablet Oral

Indapamide 2.5mg tablets (Alliance Healthcare (Distribution) Ltd) Indapamide hemihydrate  
2.5mg Tablet Oral

NAVIDREX

Moduret 25 tablets (Merck Sharp & Dohme Ltd) Amiloride hydrochloride/Hydrochlorothiazide  
2.5mg + 25mg Tablet Oral

Indapamide 2.5mg tablets (Teva UK Ltd) Indapamide hemihydrate 2.5mg Tablet Oral



CoAprovel 150mg/12.5mg tablets (Sanofi) Hydrochlorothiazide/Irbesartan 12.5mg + 150mg  
Tablet Oral  
Co-amilorfruse 2.5mg/20mg tablets (Teva UK Ltd) Amiloride hydrochloride/Furosemide 2.5mg +  
20mg Tablet Oral

Amiloride 5mg Tablet (IVAX Pharmaceuticals UK Ltd) Amiloride hydrochloride 5mg Tablet Oral  
Lisinopril 20mg / Hydrochlorothiazide 12.5mg tablets (Almus Pharmaceuticals Ltd)  
Lisinopril/Hydrochlorothiazide 20mg + 12.5mg Tablet Oral  
Cozaar-Comp 50mg/12.5mg tablets (DE Pharmaceuticals) Losartan  
potassium/Hydrochlorothiazide 50mg + 12.5mg Tablet Oral  
Frumil LS 20mg/2.5mg tablets (Sanofi) Amiloride hydrochloride/Furosemide 2.5mg + 20mg  
Tablet Oral

Natramid 2.5mg Tablet (Trinity Pharmaceuticals Ltd) Indapamide hemihydrate 2.5mg Tablet Oral  
Olmesartan medoxomil 40mg / Hydrochlorothiazide 12.5mg tablets Olmesartan  
medoxomil/Hydrochlorothiazide 40mg + 12.5mg Tablet Oral

Bendroflumethiazide 2.5mg tablets (Crescent Pharma Ltd) Bendroflumethiazide 2.5mg Tablet Oral

Lorvac XL 1.5mg tablets (Torrent Pharma (UK) Ltd) Indapamide 1.5mg Modified-release tablet Oral  
Furosemide 40mg tablets (Sigma Pharmaceuticals Plc) Furosemide 40mg Tablet Oral  
Co-zidocapt 25mg/50mg tablets (Tillomed Laboratories Ltd) Hydrochlorothiazide/Captopril 25mg  
+ 50mg Tablet Oral

Furosemide 10mg/ml Injection (Hameln Pharmaceuticals Ltd) Furosemide 10mg/ml Injection

Bendroflumethiazide 2.5mg tablets (Phoenix Healthcare Distribution  
Ltd) Bendroflumethiazide 2.5mg Tablet Oral

Bendroflumethiazide 2.5mg tablets (Sigma Pharmaceuticals  
Plc) Bendroflumethiazide 2.5mg Tablet Oral

Losartan 100mg / Hydrochlorothiazide 25mg tablets (Alliance Healthcare (Distribution)  
Ltd) Losartan potassium/Hydrochlorothiazide 100mg + 25mg Tablet Oral

Lisinopril 10mg / Hydrochlorothiazide 12.5mg tablets (A A H Pharmaceuticals  
Ltd) Lisinopril/Hydrochlorothiazide 10mg + 12.5mg Tablet Oral

Valsartan 160mg / Hydrochlorothiazide 12.5mg tablets (Arrow Generics  
Ltd) Valsartan/Hydrochlorothiazide 160mg + 12.5mg Tablet Oral

Co-tenidone 100mg/25mg tablets (Medreich Plc) Atenolol/Chlortalidone 100mg +  
25mg Tablet Oral

Co-tenidone 50mg/12.5mg tablets (Medreich Plc) Atenolol/Chlortalidone 50mg +  
12.5mg Tablet Oral

Losartan 100mg / Hydrochlorothiazide 25mg tablets (Sandoz Ltd) Losartan  
potassium/Hydrochlorothiazide 100mg + 25mg Tablet Oral

Valsartan 80mg / Hydrochlorothiazide 12.5mg tablets (Arrow Generics  
Ltd) Valsartan/Hydrochlorothiazide 80mg + 12.5mg Tablet Oral

Losartan 50mg / Hydrochlorothiazide 12.5mg tablets (Sandoz Ltd) Hydrochlorothiazide/Losartan  
potassium 12.5mg + 50mg Tablet Oral

CoAprovel 300mg/12.5mg tablets (Waymade Healthcare  
Plc) Irbesartan/Hydrochlorothiazide 300mg + 12.5mg Tablet Oral

CoAprovel 150mg/12.5mg tablets (Waymade Healthcare  
Plc) Irbesartan/Hydrochlorothiazide 150mg + 12.5mg Tablet Oral

Capozide 25mg/50mg tablets (Waymade Healthcare Plc) Hydrochlorothiazide/Captopril 25mg +  
50mg Tablet Oral

Generic Kalten capsules Atenolol/Amiloride hydrochloride/Hydrochlorothiazide 50mg + 2.5mg + 25mg Capsule Oral  
Furosemide 20mg tablets (Genesis Pharmaceuticals Ltd) Furosemide 20mg Tablet Oral  
Furosemide 40mg tablets (Sovereign Medical Ltd) Furosemide 40mg Tablet Oral

## Aspirin

### DRUG\_CODE\_ DESCRIPTION

- 68752 Aspirin 75mg tablets (Sigma Pharmaceuticals Plc) Aspirin 75mg Tablet Oral
- 66861 Aspirin 75mg effervescent tablets Aspirin 75mg Effervescent tablet Oral
  
- 34434 Aspirin 75mg dispersible tablets (Thornton & Ross Ltd) Aspirin 75mg Dispersible tablet Oral
- 71663 Aspirin 75mg tablets (Accord Healthcare Ltd) Aspirin 75mg Tablet Oral
- 4523 ASPIRIN 50 MG CAP
- 7944 ASPIRIN SOLUBLE 40 MG CAP  
Aspirin 75mg dispersible tablets (Almus Pharmaceuticals Ltd) Aspirin 75mg Dispersible tablet
- 54284 Oral
- 37541 Aspirin 227mg medicated chewing-gum Aspirin 227mg Chewing Gum Oromucosal
- 31954 Aspirin 75mg dispersible tablets (Teva UK Ltd) Aspirin 75mg Dispersible tablet Oral  
Aspirin 75mg gastro-resistant tablets (Bristol Laboratories Ltd) Aspirin 75mg Gastro-resistant
- 59021 tablet Oral  
Aspirin 75mg dispersible tablets (Phoenix Healthcare Distribution Ltd) Aspirin 75mg
- 56995 Dispersible tablet Oral
- 25718 Angettes 75 tablets (Bristol-Myers Squibb Pharmaceuticals Ltd) Aspirin 75mg Tablet Oral  
Aspirin 75mg dispersible tablets (Sigma Pharmaceuticals Plc) Aspirin 75mg Dispersible tablet
- 49685 Oral
- 32036 Aspirin 75mg dispersible tablets (Actavis UK Ltd) Aspirin 75mg Dispersible tablet Oral  
Enprin 75mg gastro-resistant tablets (Galpharm International Ltd) Aspirin 75mg Gastro-
- 18329 resistant tablet Oral
- 34385 Aspirin 75mg Soluble tablet (Co-operative) Aspirin 75mg Dispersible tablet Oral  
Micropirin 75mg gastro-resistant tablets (Dexcel-Pharma Ltd) Aspirin 75mg Gastro-resistant
- 6696 tablet Oral
- 60694 Aspirin 25mg/5ml oral solution Aspirin 5mg/1ml Oral solution Oral
- 32992 Aspirin 75mg gastro-resistant tablets (Mylan) Aspirin 75mg Gastro-resistant tablet Oral  
Aspirin 75mg gastro-resistant tablets (DE Pharmaceuticals) Aspirin 75mg Gastro-resistant
- 60777 tablet Oral
  
- 41512 Aspirin 75mg gastro-resistant tablets (Teva UK Ltd) Aspirin 75mg Gastro-resistant tablet Oral
- 7486 ASPIRIN 37.5 MG TAB  
34 Aspirin 75mg gastro-resistant tablets Aspirin 75mg Gastro-resistant tablet Oral  
Aspirin 75mg gastro-resistant tablets (Wockhardt UK Ltd) Aspirin 75mg Gastro-resistant
- 53178 tablet Oral  
Caprin 75mg gastro-resistant tablets (Wockhardt UK Ltd) Aspirin 75mg Gastro-resistant tablet
- 9144 Oral
- 42061 ASPIRIN 65 MG SUP  
Aspirin 75mg gastro-resistant tablets (Alliance Healthcare (Distribution) Ltd) Aspirin 75mg
- 74786 Gastro-resistant tablet Oral  
Aspirin 75mg gastro-resistant tablets (IVAX Pharmaceuticals UK Ltd) Aspirin 75mg Gastro-
- 34485 resistant tablet Oral
- 7417 ASPIRIN 40 MG TAB
- 60127 Aspirin 75mg tablets (DE Pharmaceuticals) Aspirin 75mg Tablet Oral
  
- 40381 Aspirin 75mg Soluble tablet (C P Pharmaceuticals Ltd) Aspirin 75mg Dispersible tablet Oral
  
- 52618 Aspirin 75mg dispersible tablets (Bristol Laboratories Ltd) Aspirin 75mg Dispersible tablet Oral

Aspirin 75mg gastro-resistant tablets (Sterwin Medicines) Aspirin 75mg Gastro-resistant  
33293 tablet Oral  
67521 Aspirin 15mg/5ml oral suspension Aspirin 3mg/1ml Oral suspension Oral

70549 Danamep 75mg dispersible tablets (Ecogen Europe Ltd) Aspirin 75mg Dispersible tablet Oral  
Nu-seals aspirin ec 75mg Gastro-resistant tablet (Eli Lilly and Company Ltd) Aspirin 75mg  
2628 Gastro-resistant tablet Oral  
74096 Aspirin 50mg/5ml oral suspension Aspirin 10mg/1ml Oral suspension Oral  
54997 Aspirin 75mg dispersible tablets (Dowelhurst Ltd) Aspirin 75mg Dispersible tablet Oral  
111 ASPIRIN 40 MG CAP  
8734 ASPIRIN disp 37.5 MG TAB  
8733 JUNIOR ASPIRIN 37.5 MG TAB  
79812 Aspirin 75mg tablets (Intrapharm Laboratories Ltd) Aspirin 75mg Tablet Oral  
50949 Aspirin 75mg tablets (A A H Pharmaceuticals Ltd) Aspirin 75mg Tablet Oral  
74302 Aspirin 75mg/5ml oral suspension Aspirin 15mg/1ml Oral suspension Oral  
Boots Aspirin 75mg gastro-resistant tablets (The Boots Company Plc) Aspirin 75mg Gastro-  
80356 resistant tablet Oral  
Aspirin 75mg dispersible tablets (Kent Pharmaceuticals Ltd) Aspirin 75mg Dispersible tablet  
33676 Oral

57057 Aspirin 75mg dispersible tablets (Wockhardt UK Ltd) Aspirin 75mg Dispersible tablet Oral  
15397 ASPIRIN SOLUBLE 50 MG TAB  
71192 Aspirin 75mg tablets (Kent Pharmaceuticals Ltd) Aspirin 75mg Tablet Oral  
67858 Aspirin 25mg capsules Aspirin 25mg Capsule Oral  
Aspirin 75mg dispersible tablets (Alliance Healthcare (Distribution) Ltd) Aspirin 75mg  
49060 Dispersible tablet Oral  
Aspirin 75mg Dispersible tablet (Numark Management Ltd) Aspirin 75mg Dispersible tablet  
80481 Oral  
34942 Aspirin 75mg Dispersible tablet (Nucare Plc) Aspirin 75mg Dispersible tablet Oral  
Aspirin 75mg dispersible tablets (IVAX Pharmaceuticals UK Ltd) Aspirin 75mg Dispersible  
31953 tablet Oral  
Aspirin 75mg gastro-resistant tablets (Phoenix Healthcare Distribution Ltd) Aspirin 75mg  
66563 Gastro-resistant tablet Oral  
Solprin 75mg Tablet (Reckitt Benckiser Healthcare (UK) Ltd) Aspirin 75mg Dispersible tablet  
22618 Oral  
80662 Aspirin 75mg tablets (Medreich Plc) Aspirin 75mg Tablet Oral  
383 ASPIRIN 60 MG TAB  
54430 Aspirin 75mg tablets (Alliance Healthcare (Distribution) Ltd) Aspirin 75mg Tablet Oral  
48021 Aspirin 75mg Tablet (Hillcross Pharmaceuticals Ltd) Aspirin 75mg Tablet Oral  
Aspirin 75mg dispersible tablets (A A H Pharmaceuticals Ltd) Aspirin 75mg Dispersible tablet  
33656 Oral  
Micropirin 75mg Gastro-resistant tablet (Ratiopharm UK Ltd) Aspirin 75mg Gastro-resistant  
19189 tablet Oral  
66546 Aspirin 75mg dispersible tablets (Numark Ltd) Aspirin 75mg Dispersible tablet Oral  
16 Aspirin 75mg tablets Aspirin 75mg Tablet Oral

66345 Aspirin 75mg dispersible tablets (DE Pharmaceuticals) Aspirin 75mg Dispersible tablet Oral  
Aspirin 75mg gastro-resistant tablets (Almus Pharmaceuticals Ltd) Aspirin 75mg Gastro-  
43709 resistant tablet Oral

54565 Aspirin 75mg dispersible tablets (Lloyds Pharmacy Ltd) Aspirin 75mg Dispersible tablet Oral  
Aspirin 75mg dispersible tablets (M & A Pharmachem Ltd) Aspirin 75mg Dispersible tablet  
80766 Oral

33320 Aspirin 75mg Dispersible tablet (Sovereign Medical Ltd) Aspirin 75mg Dispersible tablet Oral  
PostMI 75 EC tablets (Ashbourne Pharmaceuticals Ltd) Aspirin 75mg Gastro-resistant tablet  
25335 Oral

59728 Aspirin 75mg tablets (Alissa Healthcare Research Ltd) Aspirin 75mg Tablet Oral  
Aspirin 75mg dispersible tablets (Waymade Healthcare Plc) Aspirin 75mg Dispersible tablet  
56996 Oral  
1486 ASPIRIN 75 MG SUP

31938 Aspirin 75mg gastro-resistant tablets (Sandoz Ltd) Aspirin 75mg Gastro-resistant tablet Oral  
Aspirin 75mg gastro-resistant tablets (A A H Pharmaceuticals Ltd) Aspirin 75mg Gastro-  
47992 resistant tablet Oral

56883 Aspirin 75mg tablets (Waymade Healthcare Plc) Aspirin 75mg Tablet Oral  
20206 ASPIRIN 50 MG SUP  
Nu-Seals 75 gastro-resistant tablets (Alliance Pharmaceuticals Ltd) Aspirin 75mg Gastro-  
6006 resistant tablet Oral  
Aspirin 75mg gastro-resistant tablets (Actavis UK Ltd) Aspirin 75mg Gastro-resistant tablet  
34797 Oral  
Aspirin 75mg dispersible tablets (The Boots Company Plc) Aspirin 75mg Dispersible tablet  
50926 Oral

48974 Aspirin 75mg tablets (Phoenix Healthcare Distribution Ltd) Aspirin 75mg Tablet Oral  
Aspirin 75mg gastro-resistant tablets (C P Pharmaceuticals Ltd) Aspirin 75mg Gastro-resistant  
34611 tablet Oral

31870 Aspirin 320mg tablets Aspirin 320mg Tablets Oral  
Aspirin 75mg Dispersible tablet (A A H Pharmaceuticals Ltd) Aspirin 75mg Dispersible tablet  
31211 Oral

23495 ASPIRIN  
Aspirin 75mg dispersible tablets (Mawdsley-Brooks & Company Ltd) Aspirin 75mg Dispersible  
71676 tablet Oral  
Aspirin 75mg gastro-resistant tablets (Waymade Healthcare Plc) Aspirin 75mg Gastro-  
59253 resistant tablet Oral  
3 Aspirin 75mg dispersible tablets Aspirin 75mg Dispersible tablet Oral

11941 ASPIRIN SACHETS 30 MG  
Nu-seals cardio ec 75mg Gastro-resistant tablet (Genus Pharmaceuticals Ltd) Aspirin 75mg  
23878 Gastro-resistant tablet Oral  
216 ASPIRIN 70 MG TAB  
Aspirin 75mg gastro-resistant tablets (Kent Pharmaceuticals Ltd) Aspirin 75mg Gastro-  
31956 resistant tablet Oral  
Aspirin 75mg dispersible tablets (Aspar Pharmaceuticals Ltd) Aspirin 75mg Dispersible tablet  
59791 Oral

47937 Aspirin 75mg dispersible tablets (Wockhardt UK Ltd) Aspirin 75mg Dispersible tablet Oral  
Aspirin 75mg gastro-resistant tablets (Greenfield Pharmaceuticals Ltd) Aspirin 75mg Gastro-  
73994 resistant tablet Oral  
Aspirin 75mg gastro-resistant tablets (Zanza Specials International Ltd) Aspirin 75mg Gastro-  
51561 resistant tablet Oral

60693 Aspirin 15mg/5ml oral solution Aspirin 3mg/1ml Oral solution Oral

45643 Aspirin 75mg Soluble tablet (Celltech Pharma Europe Ltd) Aspirin 75mg Dispersible tablet Oral  
PostMI 75 dispersible tablets (Ashbourne Pharmaceuticals Ltd) Aspirin 75mg Dispersible  
23593 tablet Oral

34796 Aspirin 75mg Gastro-resistant tablet (Galen Ltd) Aspirin 75mg Gastro-resistant tablet Oral  
Aspirin 75mg gastro-resistant tablets (Lloyds Pharmacy Ltd) Aspirin 75mg Gastro-resistant  
81756 tablet Oral

## Hypertension

| READ_CODE | DESCRIPTION                                                 |
|-----------|-------------------------------------------------------------|
| G2...00   | Hypertensive disease                                        |
| G20..11   | High blood pressure                                         |
| G20..00   | Essential hypertension                                      |
| G201.00   | Benign essential hypertension                               |
| G20z.11   | Hypertension NOS                                            |
| G202.00   | Systolic hypertension                                       |
| G22..00   | Hypertensive renal disease                                  |
| G2z..00   | Hypertensive disease NOS                                    |
| G24..00   | Secondary hypertension                                      |
| G2...11   | BP - hypertensive disease                                   |
| G21z011   | Cardiomegaly - hypertensive                                 |
| G20z.00   | Essential hypertension NOS                                  |
| G22z.00   | Hypertensive renal disease NOS                              |
| G200.00   | Malignant essential hypertension                            |
| G24z.00   | Secondary hypertension NOS                                  |
| G21zz00   | Hypertensive heart disease NOS                              |
| G21..00   | Hypertensive heart disease                                  |
| G22..11   | Nephrosclerosis                                             |
| G2y..00   | Other specified hypertensive disease                        |
| G232.00   | Hypertensive heart&renal dis wth (congestive) heart failure |
| G241000   | Secondary benign renovascular hypertension                  |
| G233.00   | Hypertensive heart and renal disease with renal failure     |
| G22z.11   | Renal hypertension                                          |
| G24z100   | Hypertension secondary to drug                              |
| G24z000   | Secondary renovascular hypertension NOS                     |
| G21z.00   | Hypertensive heart disease NOS                              |
| G240.00   | Secondary malignant hypertension                            |
| G222.00   | Hypertensive renal disease with renal failure               |
| G244.00   | Hypertension secondary to endocrine disorders               |
| G220.00   | Malignant hypertensive renal disease                        |
| G24zz00   | Secondary hypertension NOS                                  |
| G221.00   | Benign hypertensive renal disease                           |
| G210.00   | Malignant hypertensive heart disease                        |
| G241z00   | Secondary benign hypertension NOS                           |
| G211100   | Benign hypertensive heart disease with CCF                  |
| G211.00   | Benign hypertensive heart disease                           |
| G241.00   | Secondary benign hypertension                               |
| G234.00   | Hyperten heart&renal dis+both(congestv)heart and renal fail |
| G240000   | Secondary malignant renovascular hypertension               |
| G21z000   | Hypertensive heart disease NOS without CCF                  |
| G211000   | Benign hypertensive heart disease without CCF               |
| G21z100   | Hypertensive heart disease NOS with CCF                     |
| G231.00   | Benign hypertensive heart and renal disease                 |
| G23..00   | Hypertensive heart and renal disease                        |
| G230.00   | Malignant hypertensive heart and renal disease              |
| G23z.00   | Hypertensive heart and renal disease NOS                    |
| Gyu2.00   | [X]Hypertensive diseases                                    |
| G210100   | Malignant hypertensive heart disease with CCF               |

|         |                                                               |
|---------|---------------------------------------------------------------|
| G240z00 | Secondary malignant hypertension NOS                          |
| G203.00 | Diastolic hypertension                                        |
| G210000 | Malignant hypertensive heart disease without CCF              |
| Gyu2100 | [X]Hypertension secondary to other renal disorders            |
| Gyu2000 | [X]Other secondary hypertension                               |
| G210z00 | Malignant hypertensive heart disease NOS                      |
| G28..00 | Stage 2 hypertension (NICE - Nat Ins for Hth Clin Excl 2011)  |
| G25..11 | Stage 1 hypertension                                          |
| G25..00 | Stage 1 hypertension (NICE - Nat Ins for Hth Clin Excl 2011)  |
| G27..00 | Hypertension resistant to drug therapy                        |
| G26..11 | Severe hypertension                                           |
| G211z00 | Benign hypertensive heart disease NOS                         |
| G26..00 | Severe hypertension (Nat Inst for Health Clinical Ex 2011)    |
| G20..12 | Primary hypertension                                          |
| G250.00 | Stage 1 hyperten (NICE 2011) without evidnce end organ damage |
| G251.00 | Stage 1 hyperten (NICE 2011) with evidnce end organ damage    |



## Type 1 Diabetes

| READ_CODE | DESCRIPTION                                                  |
|-----------|--------------------------------------------------------------|
| C100011   | Insulin dependent diabetes mellitus                          |
| C10E.00   | Type 1 diabetes mellitus                                     |
| C108.00   | Insulin dependent diabetes mellitus                          |
| C108700   | Insulin dependent diabetes mellitus with retinopathy         |
| C108800   | Insulin dependent diabetes mellitus - poor control           |
| C10ED00   | Type 1 diabetes mellitus with nephropathy                    |
| C10EM00   | Type 1 diabetes mellitus with ketoacidosis                   |
| C10E.11   | Type I diabetes mellitus                                     |
| C108F11   | Type I diabetes mellitus with diabetic cataract              |
| C108.12   | Type 1 diabetes mellitus                                     |
| C108J12   | Type 1 diabetes mellitus with neuropathic arthropathy        |
| C10E700   | Type 1 diabetes mellitus with retinopathy                    |
| C108.11   | IDDM-Insulin dependent diabetes mellitus                     |
| C10EH00   | Type 1 diabetes mellitus with arthropathy                    |
| C10E500   | Type 1 diabetes mellitus with ulcer                          |
| C108012   | Type 1 diabetes mellitus with renal complications            |
| C10EP00   | Type 1 diabetes mellitus with exudative maculopathy          |
| C108.13   | Type I diabetes mellitus                                     |
| C100000   | Diabetes mellitus, juvenile type, no mention of complication |
| C108B00   | Insulin dependent diabetes mellitus with mononeuropathy      |
| C108400   | Unstable insulin dependent diabetes mellitus                 |
| C10EL00   | Type 1 diabetes mellitus with persistent microalbuminuria    |
| C10EK00   | Type 1 diabetes mellitus with persistent proteinuria         |
| C108900   | Insulin dependent diabetes maturity onset                    |
| C10E800   | Type 1 diabetes mellitus - poor control                      |
| C108711   | Type I diabetes mellitus with retinopathy                    |
| C10EE00   | Type 1 diabetes mellitus with hypoglycaemic coma             |
| C108J00   | Insulin dependent diab mell with neuropathic arthropathy     |
| C102000   | Diabetes mellitus, juvenile type, with hyperosmolar coma     |
| C10E900   | Type 1 diabetes mellitus maturity onset                      |
| C10EN00   | Type 1 diabetes mellitus with ketoacidotic coma              |
| C108712   | Type 1 diabetes mellitus with retinopathy                    |
| C108C00   | Insulin dependent diabetes mellitus with polyneuropathy      |
| C103000   | Diabetes mellitus, juvenile type, with ketoacidotic coma     |
| C108E11   | Type I diabetes mellitus with hypoglycaemic coma             |
| C10E200   | Type 1 diabetes mellitus with neurological complications     |
| C10E400   | Unstable type 1 diabetes mellitus                            |
| C108F00   | Insulin dependent diabetes mellitus with diabetic cataract   |
| C108E00   | Insulin dependent diabetes mellitus with hypoglycaemic coma  |
| C108500   | Insulin dependent diabetes mellitus with ulcer               |
| C10E312   | Insulin dependent diabetes mellitus with multiple complicat  |
| C108812   | Type 1 diabetes mellitus - poor control                      |
| C10EC00   | Type 1 diabetes mellitus with polyneuropathy                 |
| C108811   | Type I diabetes mellitus - poor control                      |
| C108000   | Insulin-dependent diabetes mellitus with renal complications |
| C10E000   | Type 1 diabetes mellitus with renal complications            |
| C10E100   | Type 1 diabetes mellitus with ophthalmic complications       |
| C10E300   | Type 1 diabetes mellitus with multiple complications         |

C108211 Type I diabetes mellitus with neurological complications  
C108100 Insulin-dependent diabetes mellitus with ophthalmic comps  
C10EF00 Type 1 diabetes mellitus with diabetic cataract  
C10E411 Unstable type I diabetes mellitus  
C10E.12 Insulin dependent diabetes mellitus  
C108511 Type I diabetes mellitus with ulcer  
C108300 Insulin dependent diabetes mellitus with multiple complicatn  
C108200 Insulin-dependent diabetes mellitus with neurological comps  
C101000 Diabetes mellitus, juvenile type, with ketoacidosis  
C10EJ00 Type 1 diabetes mellitus with neuropathic arthropathy  
C10E412 Unstable insulin dependent diabetes mellitus  
C10EQ00 Type 1 diabetes mellitus with gastroparesis  
C108A00 Insulin-dependent diabetes without complication  
C108D00 Insulin dependent diabetes mellitus with nephropathy  
C108411 Unstable type I diabetes mellitus  
C108J11 Type I diabetes mellitus with neuropathic arthropathy  
C108600 Insulin dependent diabetes mellitus with gangrene  
C108011 Type I diabetes mellitus with renal complications  
C108212 Type 1 diabetes mellitus with neurological complications  
C10EM11 Type I diabetes mellitus with ketoacidosis  
C108H11 Type I diabetes mellitus with arthropathy  
C10EA11 Type I diabetes mellitus without complication  
C108911 Type I diabetes mellitus maturity onset  
C108G00 Insulin dependent diab mell with peripheral angiopathy  
C108H00 Insulin dependent diabetes mellitus with arthropathy  
C10EN11 Type I diabetes mellitus with ketoacidotic coma  
C108D11 Type I diabetes mellitus with nephropathy  
C106000 Diabetes mellitus, juvenile, + neurological manifestation  
C10EB00 Type 1 diabetes mellitus with mononeuropathy  
C108512 Type 1 diabetes mellitus with ulcer  
C10z000 Diabetes mellitus, juvenile type, + unspecified complication  
C107300 IDDM with peripheral circulatory disorder  
C10EA00 Type 1 diabetes mellitus without complication  
C105000 Diabetes mellitus, juvenile type, + ophthalmic manifestation  
C10E600 Type 1 diabetes mellitus with gangrene  
C107000 Diabetes mellitus, juvenile +peripheral circulatory disorder  
C108E12 Type 1 diabetes mellitus with hypoglycaemic coma  
C10E812 Insulin dependent diabetes mellitus - poor control  
C10E311 Type I diabetes mellitus with multiple complications  
C10EC11 Type I diabetes mellitus with polyneuropathy  
C10EG00 Type 1 diabetes mellitus with peripheral angiopathy  
C10E712 Insulin dependent diabetes mellitus with retinopathy  
C10E511 Type I diabetes mellitus with ulcer  
C104000 Diabetes mellitus, juvenile type, with renal manifestation  
C10E711 Type I diabetes mellitus with retinopathy  
C108A11 Type I diabetes mellitus without complication  
C10E911 Type I diabetes mellitus maturity onset  
C108912 Type 1 diabetes mellitus maturity onset  
C108412 Unstable type 1 diabetes mellitus  
C10E912 Insulin dependent diabetes maturity onset

|         |                                                              |
|---------|--------------------------------------------------------------|
| C10EP11 | Type I diabetes mellitus with exudative maculopathy          |
| C10E112 | Insulin-dependent diabetes mellitus with ophthalmic comps    |
| C10C.12 | Maturity onset diabetes in youth type 1                      |
| C10E512 | Insulin dependent diabetes mellitus with ulcer               |
| C108B11 | Type I diabetes mellitus with mononeuropathy                 |
| C10E111 | Type I diabetes mellitus with ophthalmic complications       |
| C10EE12 | Insulin dependent diabetes mellitus with hypoglycaemic coma  |
| C10EA12 | Insulin-dependent diabetes without complication              |
| C10EF12 | Insulin dependent diabetes mellitus with diabetic cataract   |
| C10EC12 | Insulin dependent diabetes mellitus with polyneuropathy      |
| C10E212 | Insulin-dependent diabetes mellitus with neurological comps  |
| C10E611 | Type I diabetes mellitus with gangrene                       |
| C10ED12 | Insulin dependent diabetes mellitus with nephropathy         |
| C10EL11 | Type I diabetes mellitus with persistent microalbuminuria    |
| C108112 | Type 1 diabetes mellitus with ophthalmic complications       |
| C10E012 | Insulin-dependent diabetes mellitus with renal complications |
| C10E811 | Type I diabetes mellitus - poor control                      |
| C108311 | Type I diabetes mellitus with multiple complications         |
| C10P000 | Type I diabetes mellitus in remission                        |
| C10EQ11 | Type I diabetes mellitus with gastroparesis                  |
| C10E612 | Insulin dependent diabetes mellitus with gangrene            |
| C10P011 | Type 1 diabetes mellitus in remission                        |
| C10E011 | Type I diabetes mellitus with renal complications            |
| C108F12 | Type 1 diabetes mellitus with diabetic cataract              |
| C10y000 | Diabetes mellitus, juvenile, + other specified manifestation |
| C108A12 | Type 1 diabetes mellitus without complication                |
| C108D12 | Type 1 diabetes mellitus with nephropathy                    |
| C10ED11 | Type I diabetes mellitus with nephropathy                    |
| C108C11 | Type I diabetes mellitus with polyneuropathy                 |
| C108612 | Type 1 diabetes mellitus with gangrene                       |

## Type 2 Diabetes

| READ_CODE | DESCRIPTION                                                  |
|-----------|--------------------------------------------------------------|
| C100112   | Non-insulin dependent diabetes mellitus                      |
| C10F.00   | Type 2 diabetes mellitus                                     |
| C10FJ00   | Insulin treated Type 2 diabetes mellitus                     |
| C109.00   | Non-insulin dependent diabetes mellitus                      |
| C109.11   | NIDDM - Non-insulin dependent diabetes mellitus              |
| C109700   | Non-insulin dependent diabetes mellitus - poor control       |
| C10FC00   | Type 2 diabetes mellitus with nephropathy                    |
| C10F500   | Type 2 diabetes mellitus with gangrene                       |
| C100100   | Diabetes mellitus, adult onset, no mention of complication   |
| C109600   | Non-insulin-dependent diabetes mellitus with retinopathy     |
| C109.12   | Type 2 diabetes mellitus                                     |
| C109G11   | Type II diabetes mellitus with arthropathy                   |
| C109012   | Type 2 diabetes mellitus with renal complications            |
| C109.13   | Type II diabetes mellitus                                    |
| C109J12   | Insulin treated Type II diabetes mellitus                    |
| C109J00   | Insulin treated Type 2 diabetes mellitus                     |
| C10FM00   | Type 2 diabetes mellitus with persistent microalbuminuria    |
| C10FB00   | Type 2 diabetes mellitus with polyneuropathy                 |
| C10F600   | Type 2 diabetes mellitus with retinopathy                    |
| C10F000   | Type 2 diabetes mellitus with renal complications            |
| C10F.11   | Type II diabetes mellitus                                    |
| C109711   | Type II diabetes mellitus - poor control                     |
| C109G00   | Non-insulin dependent diabetes mellitus with arthropathy     |
| C109C12   | Type 2 diabetes mellitus with nephropathy                    |
| C10FQ00   | Type 2 diabetes mellitus with exudative maculopathy          |
| C10F700   | Type 2 diabetes mellitus - poor control                      |
| C10FL00   | Type 2 diabetes mellitus with persistent proteinuria         |
| C109900   | Non-insulin-dependent diabetes mellitus without complication |
| C10FN00   | Type 2 diabetes mellitus with ketoacidosis                   |
| C10F200   | Type 2 diabetes mellitus with neurological complications     |
| C10FK00   | Hyperosmolar non-ketotic state in type 2 diabetes mellitus   |
| C109400   | Non-insulin dependent diabetes mellitus with ulcer           |
| C104100   | Diabetes mellitus, adult onset, with renal manifestation     |
| C10FH00   | Type 2 diabetes mellitus with neuropathic arthropathy        |
| C109K00   | Hyperosmolar non-ketotic state in type 2 diabetes mellitus   |
| C10D.00   | Diabetes mellitus autosomal dominant type 2                  |
| C109J11   | Insulin treated non-insulin dependent diabetes mellitus      |
| C10FF00   | Type 2 diabetes mellitus with peripheral angiopathy          |
| C106100   | Diabetes mellitus, adult onset, + neurological manifestation |
| C10F811   | Metabolic syndrome X                                         |
| C109500   | Non-insulin dependent diabetes mellitus with gangrene        |
| C109H00   | Non-insulin dependent d m with neuropathic arthropathy       |
| C105100   | Diabetes mellitus, adult onset, + ophthalmic manifestation   |
| C109612   | Type 2 diabetes mellitus with retinopathy                    |
| C102100   | Diabetes mellitus, adult onset, with hyperosmolar coma       |
| C10F311   | Type II diabetes mellitus with multiple complications        |
| C109D00   | Non-insulin dependent diabetes mellitus with hypoglyca coma  |
| C109E12   | Type 2 diabetes mellitus with diabetic cataract              |

C10FE00 Type 2 diabetes mellitus with diabetic cataract  
C109B00 Non-insulin dependent diabetes mellitus with polyneuropathy  
C109712 Type 2 diabetes mellitus - poor control  
C109212 Type 2 diabetes mellitus with neurological complications  
C109512 Type 2 diabetes mellitus with gangrene  
C10FD00 Type 2 diabetes mellitus with hypoglycaemic coma  
C10F711 Type II diabetes mellitus - poor control  
C10F100 Type 2 diabetes mellitus with ophthalmic complications  
C109B11 Type II diabetes mellitus with polyneuropathy  
C109H11 Type II diabetes mellitus with neuropathic arthropathy  
C10F900 Type 2 diabetes mellitus without complication  
C109E11 Type II diabetes mellitus with diabetic cataract  
C10F400 Type 2 diabetes mellitus with ulcer  
C10F611 Type II diabetes mellitus with retinopathy  
C109G12 Type 2 diabetes mellitus with arthropathy  
C109011 Type II diabetes mellitus with renal complications  
C109100 Non-insulin-dependent diabetes mellitus with ophthalmic comps  
C10FB11 Type II diabetes mellitus with polyneuropathy  
C109A11 Type II diabetes mellitus with mononeuropathy  
C10FP00 Type 2 diabetes mellitus with ketoacidotic coma  
C109000 Non-insulin-dependent diabetes mellitus with renal comps  
C10F911 Type II diabetes mellitus without complication  
C109F00 Non-insulin-dependent d m with peripheral angiopath  
C101100 Diabetes mellitus, adult onset, with ketoacidosis  
C109F11 Type II diabetes mellitus with peripheral angiopathy  
C109411 Type II diabetes mellitus with ulcer  
C109200 Non-insulin-dependent diabetes mellitus with neuro comps  
C109D11 Type II diabetes mellitus with hypoglycaemic coma  
C107400 NIDDM with peripheral circulatory disorder  
C10F011 Type II diabetes mellitus with renal complications  
C109611 Type II diabetes mellitus with retinopathy  
C10FG00 Type 2 diabetes mellitus with arthropathy  
C109C00 Non-insulin dependent diabetes mellitus with nephropathy  
C109111 Type II diabetes mellitus with ophthalmic complications  
C10D.11 Maturity onset diabetes in youth type 2  
C109F12 Type 2 diabetes mellitus with peripheral angiopathy  
C10FL11 Type II diabetes mellitus with persistent proteinuria  
C109D12 Type 2 diabetes mellitus with hypoglycaemic coma  
C109511 Type II diabetes mellitus with gangrene  
C109300 Non-insulin-dependent diabetes mellitus with multiple comps  
C10FA00 Type 2 diabetes mellitus with mononeuropathy  
C107100 Diabetes mellitus, adult, + peripheral circulatory disorder  
C10y100 Diabetes mellitus, adult, + other specified manifestation  
C10FR00 Type 2 diabetes mellitus with gastroparesis  
C10z100 Diabetes mellitus, adult onset, + unspecified complication  
C109C11 Type II diabetes mellitus with nephropathy  
C10FJ11 Insulin treated Type II diabetes mellitus  
C10F300 Type 2 diabetes mellitus with multiple complications  
C109412 Type 2 diabetes mellitus with ulcer  
C109H12 Type 2 diabetes mellitus with neuropathic arthropathy

|         |                                                             |
|---------|-------------------------------------------------------------|
| C109211 | Type II diabetes mellitus with neurological complications   |
| C103100 | Diabetes mellitus, adult onset, with ketoacidotic coma      |
| C109E00 | Non-insulin depend diabetes mellitus with diabetic cataract |
| C109112 | Type 2 diabetes mellitus with ophthalmic complications      |
| C109A00 | Non-insulin dependent diabetes mellitus with mononeuropathy |
| C10FM11 | Type II diabetes mellitus with persistent microalbuminuria  |
| C10F411 | Type II diabetes mellitus with ulcer                        |
| C10FE11 | Type II diabetes mellitus with diabetic cataract            |
| C10FA11 | Type II diabetes mellitus with mononeuropathy               |
| C10F211 | Type II diabetes mellitus with neurological complications   |
| C10FD11 | Type II diabetes mellitus with hypoglycaemic coma           |
| C10F111 | Type II diabetes mellitus with ophthalmic complications     |
| C10FC11 | Type II diabetes mellitus with nephropathy                  |
| C10FG11 | Type II diabetes mellitus with arthropathy                  |
| C10F511 | Type II diabetes mellitus with gangrene                     |
| C10FF11 | Type II diabetes mellitus with peripheral angiopathy        |
| C109912 | Type 2 diabetes mellitus without complication               |
| C10FP11 | Type II diabetes mellitus with ketoacidotic coma            |
| C10FN11 | Type II diabetes mellitus with ketoacidosis                 |
| C10FK11 | Hyperosmolar non-ketotic state in type II diabetes mellitus |
| C10P100 | Type II diabetes mellitus in remission                      |
| C109312 | Type 2 diabetes mellitus with multiple complications        |
| C109911 | Type II diabetes mellitus without complication              |
| C10FH11 | Type II diabetes mellitus with neuropathic arthropathy      |
| C109B12 | Type 2 diabetes mellitus with polyneuropathy                |
| C10P111 | Type 2 diabetes mellitus in remission                       |
| C10FQ11 | Type II diabetes mellitus with exudative maculopathy        |
| C109311 | Type II diabetes mellitus with multiple complications       |
| C10FR11 | Type II diabetes mellitus with gastroparesis                |

### Chronic Kidney Disease stages 3-5

| READ_CODE | DESCRIPTION                                         |
|-----------|-----------------------------------------------------|
| K050.00   | End stage renal failure                             |
| 1Z13.00   | Chronic kidney disease stage 4                      |
| 1Z12.00   | Chronic kidney disease stage 3                      |
| 1Z14.00   | Chronic kidney disease stage 5                      |
| K05..12   | End stage renal failure                             |
| 1Z1B.00   | Chronic kidney disease stage 3 with proteinuria     |
| 1Z15.00   | Chronic kidney disease stage 3A                     |
| 1Z1H.00   | Chronic kidney disease stage 4 with proteinuria     |
| 1Z1C.00   | Chronic kidney disease stage 3 without proteinuria  |
| 1Z1B.11   | CKD stage 3 with proteinuria                        |
| 1Z1E.00   | Chronic kidney disease stage 3A without proteinuria |
| 1Z1E.11   | CKD stage 3A without proteinuria                    |
| 1Z1G.00   | Chronic kidney disease stage 3B without proteinuria |
| 1Z1F.00   | Chronic kidney disease stage 3B with proteinuria    |
| 1Z16.00   | Chronic kidney disease stage 3B                     |
| 1Z1F.11   | CKD stage 3B with proteinuria                       |
| 1Z1C.11   | CKD stage 3 without proteinuria                     |
| 1Z1L.00   | Chronic kidney disease stage 5 without proteinuria  |
| 1Z1J.00   | Chronic kidney disease stage 4 without proteinuria  |
| 1Z1D.00   | Chronic kidney disease stage 3A with proteinuria    |
| 1Z1K.00   | Chronic kidney disease stage 5 with proteinuria     |
| 1Z1D.11   | CKD stage 3A with proteinuria                       |
| 1Z1J.11   | CKD stage 4 without proteinuria                     |
| 1Z1L.11   | CKD stage 5 without proteinuria                     |
| 1Z1K.11   | CKD stage 5 with proteinuria                        |
| 1Z1H.11   | CKD stage 4 with proteinuria                        |
| 1Z1G.11   | CKD stage 3B without proteinuria                    |
| K053.00   | Chronic kidney disease stage 3                      |
| K054.00   | Chronic kidney disease stage 4                      |
| K055.00   | Chronic kidney disease stage 5                      |
| 1Z1Y.00   | CKD with GFR category G3b & albuminuria category A2 |
| 1Z1T.00   | CKD with GFR category G3a & albuminuria category A1 |
| 1Z1V.00   | CKD with GFR category G3a & albuminuria category A2 |
| 1Z1b.00   | CKD with GFR category G4 & albuminuria category A2  |
| 1Z1W.00   | CKD with GFR category G3a & albuminuria category A3 |
| 1Z1X.00   | CKD with GFR category G3b & albuminuria category A1 |
| 1Z1a.00   | CKD with GFR category G4 & albuminuria category A1  |
| 1Z1e.00   | CKD with GFR category G5 & albuminuria category A2  |
| 1Z1Z.00   | CKD with GFR category G3b & albuminuria category A3 |
| 1Z1d.00   | CKD with GFR category G5 & albuminuria category A1  |
| 1Z1f.00   | CKD with GFR category G5 & albuminuria category A3  |
| 1Z1c.00   | CKD with GFR category G4 & albuminuria category A3  |

## Heart failure

| READ_CODE | DESCRIPTION                                                 |
|-----------|-------------------------------------------------------------|
| G580.00   | Congestive heart failure                                    |
| G581.00   | Left ventricular failure                                    |
| G58..11   | Cardiac failure                                             |
| G58..00   | Heart failure                                               |
| G580.11   | Congestive cardiac failure                                  |
| G58z.00   | Heart failure NOS                                           |
| G554000   | Congestive cardiomyopathy                                   |
| G581000   | Acute left ventricular failure                              |
| G581.13   | Impaired left ventricular function                          |
| G580.14   | Biventricular failure                                       |
| 101..00   | Heart failure confirmed                                     |
| G580300   | Compensated cardiac failure                                 |
| 662T.00   | Congestive heart failure monitoring                         |
| G58z.11   | Weak heart                                                  |
| 662g.00   | New York Heart Association classification - class II        |
| G58z.12   | Cardiac failure NOS                                         |
| 8HBE.00   | Heart failure follow-up                                     |
| 662f.00   | New York Heart Association classification - class I         |
| 662h.00   | New York Heart Association classification - class III       |
| G232.00   | Hypertensive heart&renal dis wth (congestive) heart failure |
| G581.11   | Asthma - cardiac                                            |
| G580000   | Acute congestive heart failure                              |
| 8B29.00   | Cardiac failure therapy                                     |
| G580200   | Decompensated cardiac failure                               |
| G582.00   | Acute heart failure                                         |
| 662W.00   | Heart failure annual review                                 |
| G580100   | Chronic congestive heart failure                            |
| 8H2S.00   | Admit heart failure emergency                               |
| G581.12   | Pulmonary oedema - acute                                    |
| 662i.00   | New York Heart Association classification - class IV        |
| G234.00   | Hyperten heart&renal dis+both(congestv)heart and renal fail |
| SP11200   | Cardiorespiratory failure as a complication of care         |
| SP11111   | Heart failure as a complication of care                     |
| 662p.00   | Heart failure 6 month review                                |
| G580400   | Congestive heart failure due to valvular disease            |
| G5y4z00   | Post cardiac operation heart failure NOS                    |
| G583.11   | HFNEF - heart failure with normal ejection fraction         |
| G583.00   | Heart failure with normal ejection fraction                 |
| 679W100   | Education about deteriorating heart failure                 |
| 661M500   | Heart failure self-management plan agreed                   |
| 8HTL000   | Referral to rapid access heart failure clinic               |
| G583.12   | Heart failure with preserved ejection fraction              |
| 2JZ..00   | On optimal heart failure therapy                            |
| 661N500   | Heart failure self-management plan review                   |



| READ_CODE | DESCRIPTION                                          |
|-----------|------------------------------------------------------|
| G3...00   | Ischaemic heart disease                              |
| G30..00   | Acute myocardial infarction                          |
| G580.00   | Congestive heart failure                             |
| G65..00   | Transient cerebral ischaemia                         |
| G64..12   | Infarction - cerebral                                |
| G581.00   | Left ventricular failure                             |
| G30..14   | Heart attack                                         |
| G58..11   | Cardiac failure                                      |
| G66..11   | CVA unspecified                                      |
| G340.12   | Coronary artery disease                              |
| G33z300   | Angina on effort                                     |
| G33..00   | Angina pectoris                                      |
| G311.13   | Unstable angina                                      |
| G65..12   | Transient ischaemic attack                           |
| G66..00   | Stroke and cerebrovascular accident unspecified      |
| G73z000   | Intermittent claudication                            |
| G340.11   | Triple vessel disease of the heart                   |
| G3z..00   | Ischaemic heart disease NOS                          |
| G30..15   | MI - acute myocardial infarction                     |
| G308.00   | Inferior myocardial infarction NOS                   |
| G71..00   | Aortic aneurysm                                      |
| G60..00   | Subarachnoid haemorrhage                             |
| G3...13   | IHD - Ischaemic heart disease                        |
| G73..12   | Ischaemia of legs                                    |
| G714.00   | Abdominal aortic aneurysm without mention of rupture |
| G65z.00   | Transient cerebral ischaemia NOS                     |
| G58..00   | Heart failure                                        |
| G341000   | Ventricular cardiac aneurysm                         |
| G631.11   | Stenosis, carotid artery                             |
| G65..13   | Vertebro-basilar insufficiency                       |
| G6...00   | Cerebrovascular disease                              |
| G30..12   | Coronary thrombosis                                  |
| G634.00   | Carotid artery stenosis                              |
| G73zz00   | Peripheral vascular disease NOS                      |
| G580.11   | Congestive cardiac failure                           |
| G65..11   | Drop attack                                          |
| G64z.00   | Cerebral infarction NOS                              |
| G73z.00   | Peripheral vascular disease NOS                      |
| G61z.00   | Intracerebral haemorrhage NOS                        |
| G72z.00   | Aneurysm NOS                                         |
| G307.00   | Acute subendocardial infarction                      |
| G672.00   | Hypertensive encephalopathy                          |
| G340000   | Single coronary vessel disease                       |
| G32..00   | Old myocardial infarction                            |
| G58z.00   | Heart failure NOS                                    |
| G631.12   | Thrombosis, carotid artery                           |
| G631.00   | Carotid artery occlusion                             |
| G621.00   | Subdural haemorrhage - nontraumatic                  |
| G74..00   | Arterial embolism and thrombosis                     |

|         |                                                              |
|---------|--------------------------------------------------------------|
| G673.00 | Cerebral aneurysm, nonruptured                               |
| G311.11 | Crescendo angina                                             |
| G61..00 | Intracerebral haemorrhage                                    |
| G554000 | Congestive cardiomyopathy                                    |
| G670.11 | Precerebral atherosclerosis                                  |
| G64z111 | Lateral medullary syndrome                                   |
| G340100 | Double coronary vessel disease                               |
| G581000 | Acute left ventricular failure                               |
| G650.11 | Insufficiency - basilar artery                               |
| G64..11 | CVA - cerebral artery occlusion                              |
| G301.00 | Other specified anterior myocardial infarction               |
| G340.00 | Coronary atherosclerosis                                     |
| G64z.12 | Cerebellar infarction                                        |
| G73..11 | Peripheral ischaemic vascular disease                        |
| G581.13 | Impaired left ventricular function                           |
| G73..00 | Other peripheral vascular disease                            |
| G66..13 | CVA - Cerebrovascular accident unspecified                   |
| G64..13 | Stroke due to cerebral arterial occlusion                    |
| G68X.00 | Sequelae of stroke,not specfd as h'morrhage or infarction    |
| G66..12 | Stroke unspecified                                           |
| G341.00 | Aneurysm of heart                                            |
| G655.00 | Transient global amnesia                                     |
| G723000 | Aneurysm of femoral artery                                   |
| G73..13 | Peripheral ischaemia                                         |
| G73z011 | Claudication                                                 |
| G71z.00 | Aortic aneurysm NOS                                          |
| G61..11 | CVA - cerebrovascular accid due to intracerebral haemorrhage |
| G343.00 | Ischaemic cardiomyopathy                                     |
| G311100 | Unstable angina                                              |
| G76z100 | Femoral artery occlusion                                     |
| G33z200 | Syncope anginosa                                             |
| G667.00 | Left sided CVA                                               |
| G614.00 | Pontine haemorrhage                                          |
| G663.00 | Brain stem stroke syndrome                                   |
| G37..00 | Cardiac syndrome X                                           |
| G64..00 | Cerebral arterial occlusion                                  |
| G302.00 | Acute inferolateral infarction                               |
| G74..11 | Arterial embolus and thrombosis                              |
| G31y000 | Acute coronary insufficiency                                 |
| G74..12 | Thrombosis - arterial                                        |
| G31y.00 | Other acute and subacute ischaemic heart disease             |
| G72..00 | Other aneurysm                                               |
| G307000 | Acute non-Q wave infarction                                  |
| G580.14 | Biventricular failure                                        |
| G76z200 | Popliteal artery occlusion                                   |
| G33z500 | Post infarct angina                                          |
| G604.00 | Subarachnoid haemorrhage from posterior communicating artery |
| G718.00 | Leaking abdominal aortic aneurysm                            |
| 101..00 | Heart failure confirmed                                      |
| G678.00 | Cereb autosom dominant arteriop subcort infarcts leukoenceph |

|         |                                                      |
|---------|------------------------------------------------------|
| G64z200 | Left sided cerebral infarction                       |
| G6z..00 | Cerebrovascular disease NOS                          |
| G674000 | Cerebral amyloid angiopathy                          |
| G64z300 | Right sided cerebral infarction                      |
| G307100 | Acute non-ST segment elevation myocardial infarction |
| G656.00 | Vertebrobasilar insufficiency                        |
| G331.11 | Variant angina pectoris                              |
| G670.00 | Cerebral atherosclerosis                             |
| G580300 | Compensated cardiac failure                          |
| G715000 | Thoracoabdominal aortic aneurysm, ruptured           |
| G311500 | Acute coronary syndrome                              |
| G300.00 | Acute anterolateral infarction                       |
| G30X000 | Acute ST segment elevation myocardial infarction     |
| 662T.00 | Congestive heart failure monitoring                  |
| G671z00 | Generalised ischaemic cerebrovascular disease NOS    |
| G58z.11 | Weak heart                                           |
| G673200 | Carotid artery dissection                            |
| C10F500 | Type 2 diabetes mellitus with gangrene               |
| G33z700 | Stable angina                                        |
| G668.00 | Right sided CVA                                      |
| G331.00 | Prinzmetal's angina                                  |
| 662g.00 | New York Heart Association classification - class II |
| G613.00 | Cerebellar haemorrhage                               |
| G30..11 | Attack - heart                                       |
| G30..16 | Thrombosis - coronary                                |
| G713.11 | Ruptured abdominal aortic aneurysm                   |
| G67..00 | Other cerebrovascular disease                        |
| G30z.00 | Acute myocardial infarction NOS                      |
| G301z00 | Anterior myocardial infarction NOS                   |
| G305.00 | Lateral myocardial infarction NOS                    |
| G641.00 | Cerebral embolism                                    |
| G64z.11 | Brainstem infarction NOS                             |
| G740.00 | Embolism and thrombosis of the abdominal aorta       |
| G715.00 | Ruptured aortic aneurysm NOS                         |
| G310.11 | Dressler's syndrome                                  |
| G34z.00 | Other chronic ischaemic heart disease NOS            |
| G65zz00 | Transient cerebral ischaemia NOS                     |
| G73z100 | Spasm of peripheral artery                           |
| G716.00 | Aortic aneurysm without mention of rupture NOS       |
| G723100 | Aneurysm of popliteal artery                         |
| G722000 | Aneurysm of common iliac artery                      |
| G32..11 | Healed myocardial infarction                         |
| G65z100 | Intermittent cerebral ischaemia                      |
| G640.00 | Cerebral thrombosis                                  |
| G710.00 | Dissecting aortic aneurysm                           |
| G711.11 | Ruptured thoracic aortic aneurysm                    |
| G669.00 | Cerebral palsy, not congenital or infantile, acute   |
| G30A.00 | Mural thrombosis                                     |
| G58z.12 | Cardiac failure NOS                                  |
| G311200 | Angina at rest                                       |

|         |                                                             |
|---------|-------------------------------------------------------------|
| G664.00 | Cerebellar stroke syndrome                                  |
| G60X.00 | Subarachnoid haemorrh from intracranial artery, unspecif    |
| G714.11 | AAA - Abdominal aortic aneurysm without mention of rupture  |
| G32..12 | Personal history of myocardial infarction                   |
| G722.00 | Aneurysm of iliac artery                                    |
| G30..17 | Silent myocardial infarction                                |
| G622.00 | Subdural haematoma - nontraumatic                           |
| G713.00 | Abdominal aortic aneurysm which has ruptured                |
| 8HBE.00 | Heart failure follow-up                                     |
| G301100 | Acute anteroseptal infarction                               |
| G311400 | Worsening angina                                            |
| G330000 | Nocturnal angina                                            |
| G721.00 | Aneurysm of renal artery                                    |
| G61..12 | Stroke due to intracerebral haemorrhage                     |
| G660.00 | Middle cerebral artery syndrome                             |
| G35..00 | Subsequent myocardial infarction                            |
| 662f.00 | New York Heart Association classification - class I         |
| G34z000 | Asymptomatic coronary heart disease                         |
| G623.00 | Subdural haemorrhage NOS                                    |
| 662h.00 | New York Heart Association classification - class III       |
| G61X100 | Right sided intracerebral haemorrhage, unspecified          |
| G662.00 | Posterior cerebral artery syndrome                          |
| G661.00 | Anterior cerebral artery syndrome                           |
| G65y.00 | Other transient cerebral ischaemia                          |
| G602.00 | Subarachnoid haemorrhage from middle cerebral artery        |
| G311.14 | Angina at rest                                              |
| G330.00 | Angina decubitus                                            |
| G62z.00 | Intracranial haemorrhage NOS                                |
| G3...12 | Atherosclerotic heart disease                               |
| G651000 | Vertebro-basilar artery syndrome                            |
| G232.00 | Hypertensive heart&renal dis wth (congestive) heart failure |
| G31y300 | Transient myocardial ischaemia                              |
| G673000 | Dissection of cerebral arteries, nonruptured                |
| G3y..00 | Other specified ischaemic heart disease                     |
| G674.00 | Cerebral arteritis                                          |
| G34y100 | Chronic myocardial ischaemia                                |
| G68..00 | Late effects of cerebrovascular disease                     |
| G652.00 | Subclavian steal syndrome                                   |
| G581.11 | Asthma - cardiac                                            |
| G731000 | Buerger's disease                                           |
| G712.00 | Thoracic aortic aneurysm without mention of rupture         |
| G310.00 | Postmyocardial infarction syndrome                          |
| G60z.00 | Subarachnoid haemorrhage NOS                                |
| G63y000 | Cerebral infarct due to thrombosis of precerebral arteries  |
| G580000 | Acute congestive heart failure                              |
| G361.00 | Atrial septal defect/curr comp folow acut myocardal infarct |
| G73y100 | Peripheral angiopathic disease EC NOS                       |
| G304.00 | Posterior myocardial infarction NOS                         |
| G650.00 | Basilar artery syndrome                                     |
| G360.00 | Haemopericardium/current comp folow acut myocard infarct    |

|         |                                                              |
|---------|--------------------------------------------------------------|
| G671100 | Chronic cerebral ischaemia                                   |
| G63y100 | Cerebral infarction due to embolism of precerebral arteries  |
| 8B29.00 | Cardiac failure therapy                                      |
| G34y000 | Chronic coronary insufficiency                               |
| G3...11 | Arteriosclerotic heart disease                               |
| G720100 | Aneurysm of radial artery                                    |
| G64z000 | Brainstem infarction                                         |
| G33z.00 | Angina pectoris NOS                                          |
| G64z400 | Infarction of basal ganglia                                  |
| G33z600 | New onset angina                                             |
| G72yA00 | Aneurysm of hepatic artery                                   |
| G341.11 | Cardiac aneurysm                                             |
| G711.00 | Thoracic aortic aneurysm which has ruptured                  |
| G580200 | Decompensated cardiac failure                                |
| G31..00 | Other acute and subacute ischaemic heart disease             |
| G582.00 | Acute heart failure                                          |
| G641000 | Cerebral infarction due to embolism of cerebral arteries     |
| G31yz00 | Other acute and subacute ischaemic heart disease NOS         |
| G74..13 | Arterial embolic and thrombotic occlusion                    |
| G34..00 | Other chronic ischaemic heart disease                        |
| G61X000 | Left sided intracerebral haemorrhage, unspecified            |
| G33zz00 | Angina pectoris NOS                                          |
| G30y000 | Acute atrial infarction                                      |
| G344.00 | Silent myocardial ischaemia                                  |
| G366.00 | Thrombosis atrium,auric append&vent/curr comp foll acute MI  |
| G303.00 | Acute inferoposterior infarction                             |
| G30X.00 | Acute transmural myocardial infarction of unspecif site      |
| G330z00 | Angina decubitus NOS                                         |
| G600.00 | Ruptured berry aneurysm                                      |
| G616.00 | External capsule haemorrhage                                 |
| G617.00 | Intracerebral haemorrhage, intraventricular                  |
| G720200 | Aneurysm of ulnar artery                                     |
| G309.00 | Acute Q-wave infarct                                         |
| G30..13 | Cardiac rupture following myocardial infarction (MI)         |
| 662W.00 | Heart failure annual review                                  |
| G723500 | Ruptured popliteal artery aneurysm                           |
| G61X.00 | Intracerebral haemorrhage in hemisphere, unspecified         |
| G610.00 | Cortical haemorrhage                                         |
| G677.00 | Occlusion/stenosis cerebral arts not result cerebral infarct |
| G62..00 | Other and unspecified intracranial haemorrhage               |
| G672.11 | Hypertensive crisis                                          |
| G72y000 | Aneurysm of common carotid art                               |
| G38..00 | Postoperative myocardial infarction                          |
| G675.00 | Moyamoya disease                                             |
| C107.11 | Diabetes mellitus with gangrene                              |
| G630.00 | Basilar artery occlusion                                     |
| G33z400 | Ischaemic chest pain                                         |
| C107.12 | Diabetes with gangrene                                       |
| G580100 | Chronic congestive heart failure                             |
| G30B.00 | Acute posterolateral myocardial infarction                   |

|         |                                                              |
|---------|--------------------------------------------------------------|
| 8H2S.00 | Admit heart failure emergency                                |
| G651.00 | Vertebral artery syndrome                                    |
| G665.00 | Pure motor lacunar syndrome                                  |
| G6X..00 | Cerebrl infarctn due/unspcf occlusn or sten/cerebrl artrsr   |
| G720000 | Aneurysm of brachial artery                                  |
| C107200 | Diabetes mellitus, adult with gangrene                       |
| G67y.00 | Other cerebrovascular disease OS                             |
| G73y000 | Diabetic peripheral angiopathy                               |
| G311300 | Refractory angina                                            |
| G34y.00 | Other specified chronic ischaemic heart disease              |
| G731.00 | Thromboangiitis obliterans                                   |
| G641.11 | Cerebral embolus                                             |
| G30y.00 | Other acute myocardial infarction                            |
| G673100 | Carotico-cavernous sinus fistula                             |
| G72y400 | Aneurysm of subclavian artery                                |
| G34yz00 | Other specified chronic ischaemic heart disease NOS          |
| G620.00 | Extradural haemorrhage - nontraumatic                        |
| G72y200 | Aneurysm of internal carotid artery                          |
| G36..00 | Certain current complication follow acute myocardial infarct |
| G311.00 | Preinfarction syndrome                                       |
| G342.00 | Atherosclerotic cardiovascular disease                       |
| G640000 | Cerebral infarction due to thrombosis of cerebral arteries   |
| G332.00 | Coronary artery spasm                                        |
| G67z.00 | Other cerebrovascular disease NOS                            |
| G362.00 | Ventric septal defect/curr comp fol acut myocardal infarctn  |
| C10FF00 | Type 2 diabetes mellitus with peripheral angiopathy          |
| G676.00 | Nonpyogenic venous sinus thrombosis                          |
| G351.00 | Subsequent myocardial infarction of inferior wall            |
| G72y500 | Aneurysm of splenic artery                                   |
| G73y.00 | Other specified peripheral vascular disease                  |
| G676000 | Cereb infarct due cerebral venous thrombosis, nonpyogenic    |
| G683.00 | Sequelae of cerebral infarction                              |
| G312.00 | Coronary thrombosis not resulting in myocardial infarction   |
| Gyu3000 | [X]Other forms of angina pectoris                            |
| G311.12 | Impending infarction                                         |
| G31y200 | Subendocardial ischaemia                                     |
| G671.00 | Generalised ischaemic cerebrovascular disease NOS            |
| G611.00 | Internal capsule haemorrhage                                 |
| C109500 | Non-insulin dependent diabetes mellitus with gangrene        |
| G301000 | Acute anteroapical infarction                                |
| G723600 | Post radiological femoral false aneurysm                     |
| G6W..00 | Cereb infarct due unsp occlus/stenos precerebr arteries      |
| G716000 | Thoracoabdominal aortic aneurysm, without mention of rupture |
| G632.00 | Vertebral artery occlusion                                   |
| G72y.00 | Aneurysm of other artery                                     |
| G30y200 | Acute septal infarction                                      |
| G341z00 | Aneurysm of heart NOS                                        |
| G384.00 | Postoperative subendocardial myocardial infarction           |
| G605.00 | Subarachnoid haemorrhage from basilar artery                 |
| G603.00 | Subarachnoid haemorrhage from anterior communicating artery  |

|         |                                                              |
|---------|--------------------------------------------------------------|
| G682.00 | Sequelae of other nontraumatic intracranial haemorrhage      |
| G581.12 | Pulmonary oedema - acute                                     |
| G680.00 | Sequelae of subarachnoid haemorrhage                         |
| G653.00 | Carotid artery syndrome hemispheric                          |
| G723.00 | Aneurysm of leg artery                                       |
| G714000 | Juxtarenal aortic aneurysm                                   |
| G63..00 | Precerebral arterial occlusion                               |
| G350.00 | Subsequent myocardial infarction of anterior wall            |
| G30yz00 | Other acute myocardial infarction NOS                        |
| G380.00 | Postoperative transmural myocardial infarction anterior wall |
| C109512 | Type 2 diabetes mellitus with gangrene                       |
| G35X.00 | Subsequent myocardial infarction of unspecified site         |
| G381.00 | Postoperative transmural myocardial infarction inferior wall |
| G612.00 | Basal nucleus haemorrhage                                    |
| Gyu3300 | [X]Other forms of chronic ischaemic heart disease            |
| G64z100 | Wallenberg syndrome                                          |
| G681.00 | Sequelae of intracerebral haemorrhage                        |
| G654.00 | Multiple and bilateral precerebral artery syndromes          |
| G72y100 | Aneurysm of external carotid artery                          |
| G68W.00 | Sequelae/other + unspecified cerebrovascular diseases        |
| 662i.00 | New York Heart Association classification - class IV         |
| G6y..00 | Other specified cerebrovascular disease                      |
| G63y.00 | Other precerebral artery occlusion                           |
| G740.13 | Leriche's syndrome                                           |
| G677000 | Occlusion and stenosis of middle cerebral artery             |
| G666.00 | Pure sensory lacunar syndrome                                |
| Gyu3.00 | [X]Ischaemic heart diseases                                  |
| G72y600 | Aneurysm of axillary artery                                  |
| Gyu6400 | [X]Other cerebral infarction                                 |
| Gyu6200 | [X]Other intracerebral haemorrhage                           |
| G311z00 | Preinfarction syndrome NOS                                   |
| G33z100 | Stenocardia                                                  |
| C109F11 | Type II diabetes mellitus with peripheral angiopathy         |
| G311011 | MI - myocardial infarction aborted                           |
| G65z000 | Impending cerebral ischaemia                                 |
| G677300 | Occlusion and stenosis of cerebellar arteries                |
| G601.00 | Subarachnoid haemorrhage from carotid siphon and bifurcation |
| C107400 | NIDDM with peripheral circulatory disorder                   |
| G72y900 | Aneurysm of inferior mesenteric artery                       |
| G618.00 | Intracerebral haemorrhage, multiple localized                |
| G63..11 | Infarction - precerebral                                     |
| G677100 | Occlusion and stenosis of anterior cerebral artery           |
| G234.00 | Hyperten heart&renal dis+both(congestv)heart and renal fail  |
| G72y300 | Aneurysm of neck artery NOS                                  |
| G722200 | Aneurysm of internal iliac artery                            |
| G363.00 | Ruptur cardiac wall w/out haemopericard/cur comp fol ac MI   |
| G341200 | Aneurysm of coronary vessels                                 |
| G720.00 | Aneurysm of artery of arm                                    |
| G72yB00 | Aneurysm of other visceral artery                            |
| G72y800 | Aneurysm of superior mesenteric artery                       |

|         |                                                              |
|---------|--------------------------------------------------------------|
| G722z00 | Aneurysm of iliac artery NOS                                 |
| G364.00 | Ruptur chordae tendinae/curr comp fol acute myocard infarct  |
| C108600 | Insulin dependent diabetes mellitus with gangrene            |
| G606.00 | Subarachnoid haemorrhage from vertebral artery               |
| C109F12 | Type 2 diabetes mellitus with peripheral angiopathy          |
| G722100 | Aneurysm of external iliac artery                            |
| G311000 | Myocardial infarction aborted                                |
| C109511 | Type II diabetes mellitus with gangrene                      |
| G615.00 | Bulbar haemorrhage                                           |
| G30y100 | Acute papillary muscle infarction                            |
| G723z00 | Aneurysm of leg artery NOS                                   |
| C107100 | Diabetes mellitus, adult, + peripheral circulatory disorder  |
| G306.00 | True posterior myocardial infarction                         |
| SP11200 | Cardiorespiratory failure as a complication of care          |
| G63..12 | Stenosis of precerebral arteries                             |
| G713000 | Ruptured suprarenal aortic aneurysm                          |
| C108G00 | Insulin dependent diab mell with peripheral angiopathy       |
| C107z00 | Diabetes mellitus NOS with peripheral circulatory disorder   |
| Gyu6100 | [X]Other subarachnoid haemorrhage                            |
| G677200 | Occlusion and stenosis of posterior cerebral artery          |
| SP11111 | Heart failure as a complication of care                      |
| G33z000 | Status anginosus                                             |
| G72y700 | Aneurysm of coeliac artery                                   |
| G723200 | Aneurysm of anterior tibial artery                           |
| G341100 | Other cardiac wall aneurysm                                  |
| G31y100 | Microinfarction of heart                                     |
| Gyu3200 | [X]Other forms of acute ischaemic heart disease              |
| G38z.00 | Postoperative myocardial infarction, unspecified             |
| C107300 | IDDM with peripheral circulatory disorder                    |
| G365.00 | Rupture papillary muscle/curr comp fol acute myocard infarct |
| G723300 | Aneurysm of dorsalis pedis artery                            |
| C10E600 | Type 1 diabetes mellitus with gangrene                       |
| C107000 | Diabetes mellitus, juvenile +peripheral circulatory disorder |
| G671000 | Acute cerebrovascular insufficiency NOS                      |
| G677400 | Occlusion+stenosis of multiple and bilat cerebral arteries   |
| G63z.00 | Precerebral artery occlusion NOS                             |
| G723400 | Aneurysm of posterior tibial artery                          |
| G353.00 | Subsequent myocardial infarction of other sites              |
| Gyu6.00 | [X]Cerebrovascular diseases                                  |
| Gyu7400 | [X]Other specified peripheral vascular diseases              |
| 662p.00 | Heart failure 6 month review                                 |
| Gyu6500 | [X]Occlusion and stenosis of other precerebral arteries      |
| Gyu6300 | [X]Cerebrl infarctn due/unspcf occlusn or sten/cerebrl artrs |
| G341300 | Acquired atrioventricular fistula of heart                   |
| Gyu6600 | [X]Occlusion and stenosis of other cerebral arteries         |
| C10EG00 | Type 1 diabetes mellitus with peripheral angiopathy          |
| G720z00 | Aneurysm of arm artery NOS                                   |
| Gyu6G00 | [X]Cerebr infarct due unsp occlus/stenos precerebr arteries  |
| G580400 | Congestive heart failure due to valvular disease             |
| Gyu6F00 | [X]Intracerebral haemorrhage in hemisphere, unspecified      |



|         |                                                              |
|---------|--------------------------------------------------------------|
| G5y4z00 | Post cardiac operation heart failure NOS                     |
| Gyu3400 | [X]Acute transmural myocardial infarction of unspecif site   |
| G673300 | Vertebral artery dissection                                  |
| G733.00 | Ischaemic foot                                               |
| G679.00 | Small vessel cerebrovascular disease                         |
| G633.00 | Multiple and bilateral precerebral arterial occlusion        |
| Gyu3600 | [X]Subsequent myocardial infarction of unspecified site      |
| G583.11 | HFNEF - heart failure with normal ejection fraction          |
| G583.00 | Heart failure with normal ejection fraction                  |
| G714300 | Aneurysm of suprarenal aorta                                 |
| G714200 | Infrarenal abdominal aortic aneurysm                         |
| G67A.00 | Cerebral vein thrombosis                                     |
| G73z012 | Vascular claudication                                        |
| C10E611 | Type I diabetes mellitus with gangrene                       |
| C10F511 | Type II diabetes mellitus with gangrene                      |
| C10FF11 | Type II diabetes mellitus with peripheral angiopathy         |
| 679W100 | Education about deteriorating heart failure                  |
| G341111 | Mural cardiac aneurysm                                       |
| G734.00 | Peripheral arterial disease                                  |
| G39..00 | Coronary microvascular disease                               |
| G657.00 | Carotid territory transient ischaemic attack                 |
| 661M500 | Heart failure self-management plan agreed                    |
| 8HTL000 | Referral to rapid access heart failure clinic                |
| G383.00 | Postoperative transmural myocardial infarction unspec site   |
| G583.12 | Heart failure with preserved ejection fraction               |
| G619.00 | Lobar cerebral haemorrhage                                   |
| G67B.00 | Reversible cerebral vasoconstriction syndrome                |
| G67B.11 | Call-Fleming syndrome                                        |
| Gyu6E00 | [X]Subarachnoid haemorrh from intracranial artery, unspecif  |
| Gyu6000 | [X]Subarachnoid haemorrhage from other intracranial arteries |
| Gyu3500 | [X]Subsequent myocardial infarction of other sites           |
| C10E612 | Insulin dependent diabetes mellitus with gangrene            |
| Gyu6C00 | [X]Sequelae of stroke,not specfd as h'morrhage or infarction |
| Gyu6700 | [X]Other specified cerebrovascular diseases                  |
| 2JZ..00 | On optimal heart failure therapy                             |
| C107y00 | Other specified diabetes mellitus with periph circ comps     |
| Gyu3100 | [X]Other current complicatns following acute myocard infarct |
| G721000 | Acquired renal artery aneurysm                               |
| 661N500 | Heart failure self-management plan review                    |
| C108612 | Type 1 diabetes mellitus with gangrene                       |
